# Supplementary material for: Prediction of Drug-Induced Liver Injury: From Molecular Physicochemical Properties and Scaffold Architectures to Machine Learning Approaches
Source: Research Square preprint supplement (doi:10.21203/rs.3.rs-4268191/v1), 2024-04-18
Supplement: Supplementary file 1 [file 1de7290a12656ede45c88e96.xlsx]

## Sheet: DILI_negative_compounds_Total_1
mol	Binary_Characterization	index
Brc1[nH]c2c3c(ccc2)C=2[C@H](N(C)C[C@@H](C(=O)N[C@]4(C(C)C)C(=O)N5[C@H](CC(C)C)C(=O)N6[C@H]([C@@]5(O)O4)CCC6)C=2)Cc13	0	1
Brc1c(NC2=NCCN2)ccc2nccnc12	0	2
Brc1cc(Cl)c(Nc2c(F)c3ncn(C)c3cc2C(=O)NOCCO)cc1	0	3
Brc1ccc([C@H](CCN(C)C)c2ncccc2)cc1	0	4
ClC(Cl)(P(=O)(O)O)P(=O)(O)O	0	5
ClC1=NO[C@@H]([C@H](N)C(=O)O)C1	0	6
ClC1C(Cl)C(Cl)C(Cl)C(Cl)C1Cl	0	7
ClC1=C(C(=O)O)N2C(=O)[C@H](NC(=O)[C@@H](N)c3ccccc3)[C@@H]2CC1	0	8
ClCC(=O)[C@]12[C@]3(C)[C@H]([C@H]4[C@](F)([C@@H](O)C3)[C@]3(C)C(=CC(=O)CC3)CC4)C[C@H]1OC(C)(C)O2	0	9
ClCC(=O)[C@@]1(O)[C@@H](C)C[C@H]2[C@]1(C)C[C@H](O)[C@]1(F)[C@]3(C)C(=CC(=O)C=C3)CC[C@H]21	0	10
ClCC(=O)[C@@]1(O)[C@@H](C)C[C@@H]2[C@]1(C)C[C@H](O)[C@]1(F)[C@]3(C)C([C@@H](F)C[C@@H]21)=CC(=O)C=C3	0	11
ClCCN(CCCl)C	0	12
ClCCN(C(=O)Oc1cc2c([C@@H]3[C@H]([C@H]4[C@@](C)([C@H](O)CC4)CC3)CC2)cc1)CCCl	0	13
ClCCN([C@H](COc1ccccc1)C)Cc1ccccc1	0	14
ClCC(=O)[C@@]1(O)[C@@H](C)C[C@@H]2[C@]1(C)C[C@H](O)[C@]1(Cl)[C@]3(C)C(=CC(=O)C=C3)CC[C@@H]21	0	15
Cl[C@]12[C@@H](O)C[C@]3(C)[C@@](O)(C(=O)CO)[C@@H](C)C[C@H]3[C@@H]1CCC=1[C@]2(C)C=CC(=O)C=1	0	16
Cl[C@]12[C@@H](O)C[C@]3(C)[C@@](OC(=O)CC)(C(=O)COC(=O)CC)[C@@H](C)C[C@H]3[C@@H]1CCC=1[C@]2(C)C=CC(=O)C=1	0	17
ClCC(=O)[C@@]1(OC(=O)c2occc2)[C@@H](C)C[C@@H]2[C@]1(C)C[C@H](O)[C@]1(Cl)[C@]3(C)C(=CC(=O)C=C3)CC[C@@H]21	0	18
Cl[C@H]1[C@@H]2[C@H]([C@@H](O)C[C@@]3(C)[C@@](O)(C(=O)CO)[C@@H](C)C[C@H]23)[C@@]2(C)C(=CC(=O)C=C2)C1	0	19
Cl/C(/Cl)=C\[C@H]1[C@@H](C(=O)OCc2cc(Oc3ccccc3)ccc2)C1(C)C	0	20
Clc1c(Cl)c(C(=O)C(=C)CC)ccc1OCC(=O)O	0	21
Clc1c(Cl)cccc1N1CCN(CCCCOc2cc3NC(=O)CCc3cc2)CC1	0	22
Clc1c(NC(=O)C(=O)O)cc(C#N)cc1NC(=O)C(=O)O	0	23
Clc1c(Nc2c(C(=O)O)cccc2)c(Cl)ccc1C	0	24
Clc1c(Cl)cccc1[C@H]1C(C(=O)OCC)=C(C)NC(C)=C1C(=O)OC	0	25
Clc1c(Cl)ccc2N=C3N(CC(=O)N3)Cc12	0	26
Clc1c(O)c(O)cc2[C@@H](c3ccc(O)cc3)CNCCc12	0	27
Clc1c(N)cc(OC)c(C(=O)N[C@H]2[C@@H](OC)CN(CCCOc3ccc(F)cc3)CC2)c1	0	28
Clc1c([C@@H](OCc2ccc(Cl)cc2)Cn2cncc2)ccc(Cl)c1	0	29
Clc1c([C@@H](OCc2c(Cl)cc(Cl)cc2)Cn2cncc2)ccc(Cl)c1	0	30
Clc1c([C@@H](SCc2ccc(Cl)cc2)Cn2cncc2)ccc(Cl)c1	0	31
Clc1c(/C(=N\OCc2c(Cl)cc(Cl)cc2)/Cn2cncc2)ccc(Cl)c1	0	32
Clc1c([C@]2(Cn3ncnc3)O[C@@H](COc3ccc(N4CCN(C(C)C)CC4)cc3)CO2)ccc(Cl)c1	0	33
Clc1c(CO[C@H](Cn2cncc2)c2c(Cl)cc(Cl)cc2)ccs1	0	34
Clc1c(/N=C/2\NCCN\2)c(Cl)cc(N)c1	0	35
Clc1c(C(=O)OCCN(CC)CC)ccc(N)c1	0	36
Clc1c(S(=O)(=O)N)cc2S(=O)(=O)NC=Nc2c1	0	37
Clc1c(CCN2CCN(c3nsc4c3cccc4)CC2)cc2c(NC(=O)C2)c1	0	38
ClC[C@H]1N(C)S(=O)(=O)c2c(N1)cc(Cl)c(S(=O)(=O)N)c2	0	39
Clc1c(S(=O)(=O)N)cc2S(=O)(=O)N(C)[C@H](CSCC(F)(F)F)Nc2c1	0	40
Clc1cc2C(c3c(F)cccc3)=NCc3n(c(C)nc3)-c2cc1	0	41
Clc1cc2C(c3ccccc3)=NCc3n(-c2cc1)cnn3	0	42
Clc1cc2C(c3ccccc3)=N[C@H](O)C(=O)N(C)c2cc1	0	43
Clc1cc2C(c3ccccc3)=NCC(=O)N(CC(F)(F)F)c2cc1	0	44
Clc1cc2C(c3c(F)cccc3)=NCC(=S)N(CC(F)(F)F)c2cc1	0	45
Clc1cc2C(c3c(F)cccc3)=NCC(=O)N(CCN(CC)CC)c2cc1	0	46
Clc1cc2C(N3CCNCC3)=Nc3c(Oc2cc1)cccc3	0	47
Clc1cc2nccc(N[C@H](CCCN(CCO)CC)C)c2cc1	0	48
Clc1ccc(NC(NC(=N)NCCCCCCNC(=N)NC(=N)Nc2ccc(Cl)cc2)=N)cc1	0	49
Clc1ccc(SC(P(=O)(O)O)P(=O)(O)O)cc1	0	50
Clc1ccc(C(=O)c2n(C)c(CC(=O)O)cc2C)cc1	0	51
Clc1ccc([C@H](CN)CC(=O)O)cc1	0	52
Clc1ccc([C@H](N2CCN(CCOCCO)CC2)c2ccccc2)cc1	0	53
Clc1ccc([C@@H](N2CCN(Cc3cc(C)ccc3)CC2)c2ccccc2)cc1	0	54
Clc1ccc([C@@H](OCCN(C)C)c2ncccc2)cc1	0	55
Clc1ccc(C2(O)CCN(CCC(C(=O)N(C)C)(c3ccccc3)c3ccccc3)CC2)cc1	0	56
Clc1ccc(CC2=NN([C@@H]3CCN(C)CCC3)C(=O)c3c2cccc3)cc1	0	57
Clc1ccc([C@@](OCC[C@H]2N(C)CCC2)(C)c2ccccc2)cc1	0	58
Clc1c(CC(=O)/N=C(\N)/N)c(Cl)ccc1	0	59
Clc1c(S[C@@H](CCc2ccc(Cl)cc2)Cn2cncc2)c(Cl)ccc1	0	60
Clc1c(/C=N/NC(=N)N)c(Cl)ccc1	0	61
Clc1c(C(n2cncc2)(c2ccccc2)c2ccccc2)cccc1	0	62
Clc1c([C@@]2(NC)C(=O)CCCC2)cccc1	0	63
Clc1c(C2=N[C@H](O)C(=O)Nc3c2cc(Cl)cc3)cccc1	0	64
Clc1c(C2=NCC(=O)Nc3c2cc([N+](=O)[O-])cc3)cccc1	0	65
Clc1c([C@H]2C(C(=O)OCC)=C(COCCN)NC(C)=C2C(=O)OC)cccc1	0	66
Clc1c(C=2Oc3c([C@H]4[C@@H](O)CN(C)CC4)c(O)cc(O)c3C(=O)C=2)cccc1	0	67
Clc1nc(N)c2ncn([C@@H]3O[C@H](CO)[C@H](O)C3)c2n1	0	68
FC(F)(F)C(=O)N[C@@H]1[C@H](O)[C@@H](C)O[C@H](O[C@@H]2c3c(O)c4C(=O)c5c(OC)cccc5C(=O)c4c(O)c3C[C@@](O)(C(=O)COC(=O)CCCC)C2)C1	0	69
FC(F)(F)C=1C(=O)NC(=O)N([C@H]2O[C@H](CO)[C@@H](O)C2)C=1	0	70
FC(F)(F)c1cc(OC[C@H](O)/C=C/[C@H]2[C@@H](C/C=C\CCCC(=O)OC(C)C)[C@@H](O)C[C@H]2O)ccc1	0	71
FC(F)(F)c1cc(CCCN[C@H](C)c2c3c(ccc2)cccc3)ccc1	0	72
FC(F)(F)c1cc(C[C@@H](NCC)C)ccc1	0	73
FC(F)(F)c1c(NC(=O)[C@H]2[C@]3(C)[C@H]([C@@H]4[C@H]([C@]5(C)[C@H](NC(=O)C=C5)CC4)CC3)CC2)cc(C(F)(F)F)cc1	0	74
F[C@H](OC(F)F)C(F)(F)F	0	75
F[C@H]1C=2[C@@](C)([C@H]3[C@@H](O)C[C@]4(C)[C@]5(C(=O)CO)OC(C)(C)O[C@@H]5C[C@H]4[C@@H]3C1)C=CC(=O)C=2	0	76
F[C@H]1C=2[C@@](C)([C@@]3(F)[C@@H](O)C[C@]4(C)[C@]5(C(=O)COC(=O)C)OC(C)(C)O[C@@H]5C[C@H]4[C@@H]3C1)C=CC(=O)C=2	0	77
F[C@]12[C@H](O)C[C@]3(C)[C@@](O)(C(=O)CO)[C@H](C)C[C@H]3[C@@H]1CCC=1[C@]2(C)C=CC(=O)C=1	0	78
F[C@]12[C@H](O)C[C@]3(C)[C@@](O)(C(=O)CO)[C@H](O)C[C@H]3[C@@H]1CCC=1[C@]2(C)C=CC(=O)C=1	0	79
F[C@]12[C@@H](O)C[C@]3(C)[C@]4(C(=O)COC(=O)C)OC5(O[C@@H]4C[C@H]3[C@@H]1CCC=1[C@]2(C)C=CC(=O)C=1)CCCC5	0	80
F[C@]12[C@H](O)C[C@]3(C)[C@@](O)(C(=O)CO)CC[C@H]3[C@@H]1CCC=1[C@]2(C)CCC(=O)C=1	0	81
F[C@]12[C@@H](O)C[C@]3(C)[C@@](O)(C(=O)COC(=O)C)CC[C@H]3[C@@H]1CCC=1[C@]2(C)CCC(=O)C=1	0	82
F[C@]12[C@@H](O)C[C@]3(C)[C@@H](C(=O)CO)[C@H](C)C[C@H]3[C@@H]1CCC=1[C@]2(C)C=CC(=O)C=1	0	83
F[C@]12[C@H](O)C[C@]3(C)[C@@](O)(C(=O)C)CC[C@H]3[C@@H]1C[C@H](C)C=1[C@]2(C)C=CC(=O)C=1	0	84
Fc1c(N2C[C@H](C)NCC2)c(F)cc2C(=O)C(C(=O)O)=CN(CC)c12	0	85
Fc1cc2c(O[C@@H]([C@@H](O)CNC[C@@H](O)[C@@H]3Oc4c(cc(F)cc4)CC3)CC2)cc1	0	86
Fc1cc2C(=O)N(C)Cc3c(C(=O)OCC)ncn3-c2cc1	0	87
Fc1cc2c([C@@H](C(C)C)[C@@](OC(=O)COC)(CCN(CCCc3[nH]c4c(n3)cccc4)C)CC2)cc1	0	88
Fc1ccc(C(=O)CCCN2CC=C(N3C(=O)Nc4c3cccc4)CC2)cc1	0	89
Fc1ccc(C(CCCN2CCC(N3C(=O)Nc4c3cccc4)CC2)c2ccc(F)cc2)cc1	0	90
Fc1ccc(C2(C#N)CCC(N3C[C@H](C)[C@@](C(=O)O)(c4ccccc4)CC3)CC2)cc1	0	91
Fc1ccc(Cn2c(NC3CCN(CCc4ccc(OC)cc4)CC3)nc3c2cccc3)cc1	0	92
Ic1c(NC(=O)COC)c(I)c(C(=O)NC[C@@H](O)CO)c(I)c1C(=O)N(C[C@@H](O)CO)C	0	93
Ic1c(NC(=O)[C@H](O)C)c(I)c(C(=O)NC(CO)CO)c(I)c1C(=O)NC(CO)CO	0	94
Ic1c(N(C(=O)C)C)c(I)c(C(=O)NC)c(I)c1C(=O)NCC(=O)Nc1c(I)c(C(=O)O)c(I)c(C(=O)NCCO)c1I	0	95
Ic1c(N(C(=O)C)CC(O)CN(C(=O)C)c2c(I)c(C(=O)NC[C@@H](O)CO)c(I)c(C(=O)NC[C@@H](O)CO)c2I)c(I)c(C(=O)NC[C@@H](O)CO)c(I)c1C(=O)NC[C@@H](O)CO	0	96
Ic1c(N(C(=O)C)C[C@@H](O)CO)c(I)c(C(=O)NC[C@@H](O)CO)c(I)c1C(=O)NC[C@@H](O)CO	0	97
Ic1c(N(C(=O)CO)CCO)c(I)c(C(=O)NC[C@@H](O)CO)c(I)c1C(=O)NC[C@@H](O)CO	0	98
Ic1c(NC(=O)C)c(I)c(C(=O)O)c(I)c1NC(=O)C	0	99
Ic1c(NC(=O)C)c(I)cc(I)c1C(=O)O	0	100
Ic1c(NC(=O)CCCCC(=O)Nc2c(I)c(C(=O)O)c(I)cc2I)c(I)cc(I)c1C(=O)O	0	101
Ic1c(Oc2cc(I)c(O)c(I)c2)c(I)cc(C[C@H](N)C(=O)O)c1	0	102
Ic1c(Oc2cc(I)c(O)cc2)c(I)cc(C[C@H](N)C(=O)O)c1	0	103
N(CC#C)[C@H]1c2c(cccc2)CC1	0	104
N(C[C@@H](CN1c2c(cccc2)CCc2c1cccc2)C)(C)C	0	105
N(CCCC12c3c(cccc3)C(c3c1cccc3)CC2)C	0	106
N(CCCC1c2c(cccc2)C=Cc2c1cccc2)C	0	107
N=C(NCCN1CCCCCCC1)N	0	108
N(CC/C=C/1\c2c(cccc2)C=Cc2c\1cccc2)(C)C	0	109
N(C/C=C/c1ccccc1)(Cc1c2c(ccc1)cccc2)C	0	110
N(Cc1c2c(ccc1)cccc2)(Cc1ccc(C(C)(C)C)cc1)C	0	111
N(CC#C)(Cc1ccccc1)C	0	112
N12CN3CN(C1)CN(C3)C2	0	113
[C@@H]1(C2=NCCN2)c2c(cccc2)CCC1	0	114
C(c1c2c(ccc1)cccc2)C1=NCCN1	0	115
C(c1ccccc1)C1=NCCN1	0	116
N[C@@H](C)C12CC3CC(C1)CC(C2)C3	0	117
NC(Cc1ccccc1)(C)C	0	118
NC12C[C@]3(C)C[C@](C)(C1)CC(C2)C3	0	119
NC12CC3CC(C1)CC(C2)C3	0	120
O=C(Oc1c(OC(=O)C(C)(C)C)ccc([C@H](O)CNC)c1)C(C)(C)C	0	121
O=C(OCC)[C@@H](N[C@@H](C(=O)N1[C@@H](C(=O)O)C[C@@H]2[C@@H]1CCCC2)C)CCc1ccccc1	0	122
O=C(OCC#CCN(CC)CC)[C@](O)(c1ccccc1)C1CCCCC1	0	123
O=C(Oc1c(C)c(C)c(OC[C@H](O)CNC(C)C)cc1C)C	0	124
O=C(Oc1ccc(C(c2ncccc2)c2ccc(OC(=O)C)cc2)cc1)C	0	125
O=C(OCCN(CC)CC)C1(C2CCCCC2)CCCCC1	0	126
O=C(OCC)C1(c2ccccc2)CCN(C)CC1	0	127
O=C(OCC)C1(c2ccccc2)CCN(CCC(C#N)(c2ccccc2)c2ccccc2)CC1	0	128
O=C(OCC)C1(c2ccccc2)CCN(CCc2ccc(N)cc2)CC1	0	129
O=[N+]([O-])c1c([C@@H]2C(C(=O)OCC(C)C)=C(C)NC(C)=C2C(=O)OC)cccc1	0	130
O=C(O[C@H]1[C@]2(C)[C@H]([C@H]3[C@@H]([C@]4(C)C(=CC(=O)CC4)CC3)CC2)CC1)CC	0	131
O=C(OC)CCC(=O)CN	0	132
O=C(O[C@@H]1[C@]2(C)[C@H]([C@@H]3[C@H](c4c(cc(O)cc4)CC3)CC2)CC1)CCCC	0	133
O=C(O[C@@H]1[C@@]2(C)[C@@H]([C@H]3[C@@H]([C@@]4(C)C(=CC(=O)CC4)CC3)CC2)CC1)CCCCCC	0	134
O=C(Oc1cc([C@@H](N(C)C)C)ccc1)N(CC)C	0	135
O=C(O[C@@H]1C2CCN(C1)CC2)N1[C@H](c2ccccc2)c2c(cccc2)CC1	0	136
O=C(Oc1cc2[C@@]3(C)[C@@H](N(C)c2cc1)N(C)CC3)NC	0	137
O=C(OC1C[C@@H]2N3[C@H](C1)CC(C(=O)C3)C2)c1c2c([nH]c1)cccc2	0	138
O=C(OCCN(CC)CC)c1ccc(N)cc1	0	139
O=C(OCCN(C)C)c1ccc(NCCCC)cc1	0	140
O=C(OCCOCCOCCOCCOCCOCCOCCOCCOCCOC)c1ccc(NCCCC)cc1	0	141
O=C(Oc1c(OC(=O)c2ccc(C)cc2)ccc([C@@H](O)CNC(C)(C)C)c1)c1ccc(C)cc1	0	142
O=C(O)[C@H](Oc1nc(C)cc(C)n1)C(OC)(c1ccccc1)c1ccccc1	0	143
O([C@@](C)(c1ncccc1)c1ccccc1)CCN(C)C	0	144
O([C@H](C[N+](C)(C)C)C)C([O-])=N	0	145
O=C(OCC)O[C@]1(C(=O)COC(=O)CC)[C@@]2(C)[C@@H]([C@H]3[C@H]([C@@H](O)C2)[C@]2(C)C(=CC(=O)C=C2)CC3)CC1	0	146
O(C(c1ccccc1)c1ccccc1)C1C[C@@H]2N(C)[C@H](C1)CC2	0	147
O(C(c1ccccc1)c1ccccc1)CCN(C)C	0	148
O([C@@H](c1c(C)cccc1)c1ccccc1)CCN(C)C	0	149
O=C(OC)[C@H]1[C@@H](OC)[C@H](OC(=O)c2cc(OC)c(OC)c(OC)c2)C[C@@H]2[C@@H]1C[C@@H]1N(C2)CCc2c3c([nH]c12)cc(OC)cc3	0	150
O(C)c1c(OC)cc(NCc2c(C)c3c(N)nc(N)nc3cc2)cc1OC	0	151
O(C)c1cc(N[C@H](CCCN)C)c2ncccc2c1	0	152
O(C)c1cc([C@]2(O)[C@H](CN(C)C)CCCC2)ccc1	0	153
O=C(NCc1cc(OC)c(O)cc1)CCCC/C=C/C(C)C	0	154
O=C(OCC)[C@H](N[C@@H](C(=O)N1[C@H](C(=O)O)Cc2c(cc(OC)c(OC)c2)C1)C)CCc1ccccc1	0	155
O=C(O[C@@H]1[C@](O)(C(=O)OC)[C@@H]2N(C)c3c(cc(c(OC)c3)[C@]3(C(=O)OC)c4[nH]c5c(c4CN4CC(CC)=C[C@H](C3)C4)cccc5)[C@@]32[C@@H]2[C@@]1(CC)C=CCN2CC3)C	0	156
O=C(O[C@@H]1[C@](O)(C(=O)OC)[C@@H]2N(C)c3c(cc(c(OC)c3)[C@]3(C(=O)OC)c4[nH]c5c(c4CCN4C[C@](O)(CC)C[C@H](C3)C4)cccc5)[C@@]32[C@@H]2[C@@]1(CC)C=CCN2CC3)C	0	157
O(C)c1cc2c(cc1)C[C@H]1N(C)CC[C@@]32[C@H]1CCCC3	0	158
O=C(NCCc1c2c([nH]c1)ccc(OC)c2)C	0	159
O(C)c1c([C@@H](O)[C@H](N)C)cc(OC)cc1	0	160
O=C(NC[C@H](O)c1c(OC)ccc(OC)c1)CN	0	161
O=C(O)c1cc2c(cc(-c3cc(c(OC)cc3)C34CC5CC(C3)CC(C4)C5)cc2)cc1	0	162
O(C[C@@H](N[C@H]([C@@H](O)c1ccc(O)cc1)C)C)c1ccccc1	0	163
O=C(O)COc1c2c(ccc1)C[C@H]1[C@@H](CC[C@H](O)CCCCC)[C@@H](O)C[C@@H]1C2	0	164
O(C[C@H](O)CNC(C)(C)C)c1c2c(ccc1)C[C@@H](O)[C@H](O)C2	0	165
O(C[C@H](O)CNC(C)(C)C)c1c2c(NC(=O)CC2)ccc1	0	166
O(C[C@H](O)CNC(C)(C)C)c1c2c(C(=O)CCC2)ccc1	0	167
O(C[C@H](O)CNC(C)(C)C)c1c(C2CCCC2)cccc1	0	168
O(C[C@H](O)CNC(C)C)c1c2c([nH]cc2)ccc1	0	169
O(C[C@H](O)CNC(C)C)c1c2c(ccc1)cccc2	0	170
O=C(N)Cc1ccc(OC[C@H](O)CNC(C)C)cc1	0	171
O=C(OC)CCc1ccc(OC[C@H](O)CNC(C)C)cc1	0	172
O(CCc1ccc(OC[C@H](O)CNC(C)C)cc1)CC1CC1	0	173
O(C(C)C)CCOCc1ccc(OC[C@@H](O)CNC(C)C)cc1	0	174
O=C(OC[C@@H](O)COc1c(OC)cccc1)N	0	175
O=C(OCCN(CC)CC)c1cc(N)c(OCCC)cc1	0	176
O=C(N[C@@H]1C(=O)N[C@@H]([C@H](O)C)C(=O)N2[C@H](C(=O)N[C@@H]([C@H](O)[C@H](O)c3ccc(O)cc3)C(=O)N[C@@H]([C@H](O)C)C(=O)N3[C@@H]([C@@H](O)[C@H](C)C3)C(=O)N[C@H](O)[C@H](O)C1)C[C@H](O)C2)c1ccc(-c2ccc(-c3ccc(OCCCCC)cc3)cc2)cc1	0	177
O(CCCCCOc1ccc(C(=N)N)cc1)c1ccc(C(=N)N)cc1	0	178
O=C(NCC(C(=O)N)(C)C)[C@@H](C(C)C)C[C@@H](O)[C@H](N)C[C@@H](C(C)C)Cc1cc(OCCCOC)c(OC)cc1	0	179
O(CCN(C)C)c1c(Cc2ccccc2)cccc1	0	180
O(CCN(CC)CC)c1c(OCCN(CC)CC)cccc1OCCN(CC)CC	0	181
O(CCOc1c(OCCOC)cc2ncnc(Nc3cc(C#C)ccc3)c2c1)C	0	182
O(C([O-])=N)CC[N+](C)(C)C	0	183
O=C(OC[C@](COC(=O)N)(CCC)C)NC(C)C	0	184
O(OC(=O)c1ccccc1)C(=O)c1ccccc1	0	185
O=C(N[C@@H]1[C@H]([C@@H](O)[C@@H](O)CO)OC(C(=O)O)=C[C@H]1/N=C(\N)/N)C	0	186
O=C1[C@@H]([C@H](O)CO)OC(O)=C1O	0	187
O=C(C)[C@@]1(O)C[C@@H](O[C@H]2O[C@H](C)[C@@H](O)[C@@H](N)C2)c2c(O)c3C(=O)c4c(C(=O)c3c(O)c2C1)cccc4	0	188
O([C@@H]1[C@H](C)O[C@H](O[C@@H]2C[C@H]3[C@@](C)([C@H]4[C@@H]([C@]5(O)[C@](C)([C@H](O)C4)[C@H](C4=CC(=O)OC4)CC5)CC3)CC2)C[C@@H]1O)[C@H]1O[C@@H](C)[C@@H](O[C@H]2O[C@H](C)[C@H](O)[C@H](O)C2)[C@@H](O)C1	0	189
O=C(OCCCCCCCCC(=O)O)/C=C(/C[C@H]1[C@@H](O)[C@@H](O)[C@@H](C[C@H]2[C@@H]([C@@H]([C@H](O)C)C)O2)CO1)\C	0	190
O([C@@H]1[C@H](O[C@@H]2[C@H](N)[C@H](O)[C@H](O)[C@H](CN)O2)[C@H](N)C[C@H](N)[C@@H]1O)[C@H]1[C@@H](O)[C@@H](O[C@H]2[C@@H](N)[C@@H](O)[C@@H](O)[C@@H](CN)O2)[C@@H](CO)O1	0	191
O([C@@H]1[C@H](O[C@@H]2[C@H](N)[C@H](O)[C@H](O)[C@H](CO)O2)[C@H](N)C[C@H](N)[C@@H]1O)[C@H]1[C@@H](O)[C@@H](O[C@H]2[C@@H](N)[C@@H](O)[C@@H](O)[C@@H](CN)O2)[C@@H](CO)O1	0	192
O([C@@H]1[C@H](O)[C@H](O[C@@H]2[C@H](O)[C@H](N)[C@H](O)[C@H](CO)O2)[C@H](N)C[C@@H]1N)[C@H]1[C@@H](O)[C@@H](O)[C@@H](O)[C@@H](CN)O1	0	193
O([C@H]1[C@@H](O)[C@@H](O[C@H]2[C@@H](N)C[C@@H](O)[C@@H](CN)O2)[C@@H](N)C[C@H]1N)[C@@H]1[C@H](O)[C@H](N)[C@H](O)[C@H](CO)O1	0	194
OC[C@@H]1[C@H](O)[C@H](O)[C@@H](N)[C@@H](O)O1	0	195
O=NN(C(=O)N[C@@H]1[C@H](O)[C@H](O)[C@H](CO)O[C@@H]1O)C	0	196
O=C[C@]1(O)[C@@H](O[C@H]2[C@@H](NC)[C@@H](O)[C@@H](O)[C@@H](CO)O2)[C@@H](O[C@H]2[C@@H](O)[C@@H](O)[C@@H](NC(=N)N)[C@@H](O)[C@H]2NC(=N)N)O[C@H]1C	0	197
O([C@H]1[C@@H](O)[C@@H](O)[C@@H](O)O[C@H]1CO)[C@H]1[C@@H](O)[C@@H](O)[C@@H](O)[C@@H](CO)O1	0	198
O=C1N([C@@H]2O[C@@H](CO)[C@@H](O)C2)C=C(C)C(=O)N1	0	199
OC[C@@H]1[C@@H](O)C[C@H](n2c3N=CNC[C@@H](O)c3nc2)O1	0	200
O=C(OCC1=C(C)OC(=O)O1)c1c2n(Cc3ccc(-c4c(C5=NOC(=O)N5)cccc4)cc3)c(OCC)nc2ccc1	0	201
O([C@@H]1[C@H](O)[C@H](O[C@@H]2[C@H](O)[C@H](NC)[C@@](O)(C)CO2)[C@H](N)C[C@@H]1N)[C@@H]1[C@H](N)CC[C@H]([C@@H](NC)C)O1	0	202
O=C1OC2(c3c1cccc3)c1c(Oc3c2ccc(O)c3)cc(O)cc1	0	203
O=[N+](O[C@H]1[C@@H]2OC[C@H](O)[C@@H]2OC1)[O-]	0	204
O=[N+](O[C@@H]1[C@@H]2OC[C@H](O[N+](=O)[O-])[C@@H]2OC1)[O-]	0	205
O=C(OC1C[C@@H]2N(C)[C@@H]([C@@H]3O[C@H]23)C1)[C@@H](CO)c1ccccc1	0	206
O=C1[C@@H]2Oc3c(O)ccc4c3[C@@]32[C@H]([C@H](N(C)CC3)C4)CC1	0	207
Oc1c2O[C@H]3C(=C)CC[C@@]4(O)[C@@H]5N(CC6CC6)CC[C@]34c2c(cc1)C5	0	208
O=C1[C@@H]2Oc3c(O)ccc4c3[C@@]32[C@](O)([C@H](N(CC=C)CC3)C4)CC1	0	209
O[C@@H]1[C@@H]2Oc3c(O)ccc4c3[C@@]32[C@](O)([C@H](N(CC2CCC2)CC3)C4)CC1	0	210
O(C)c1c2O[C@H]3C(=O)CC[C@@]4(O)[C@@H]5N(C)CC[C@]34c2c(cc1)C5	0	211
O([C@@H]1[C@@H](C)O[C@@H](O[C@@H]2C[C@@H]3[C@@](C)([C@@H]4[C@H]([C@]5(O)[C@@](C)([C@@H](C6=CC(=O)OC6)CC5)CC4)CC3)CC2)C[C@@H]1O)[C@@H]1O[C@H](C)[C@@H](O[C@@H]2O[C@H](C)[C@@H](O)[C@@H](O)C2)[C@@H](O)C1	0	212
O=C1[C@@H](CC)[C@@H](Cc2n(C)cnc2)CO1	0	213
O=C1OC[C@@H](Cc2cc3c(CCN(C)C)c[nH]c3cc2)N1	0	214
O=C1[C@](O)(CC)C2=C(C(=O)N3C(c4nc5c(c(CN(C)C)c(O)cc5)cc4C3)=C2)CO1	0	215
O(C)c1c(OC)cc([C@H]2[C@@H]3C(=O)OC[C@H]3[C@@H](O)c3c2cc2OCOc2c3)cc1OC	0	216
O=C(N1CCN(c2nc(N)c3c(n2)cc(OC)c(OC)c3)CC1)[C@@H]1OCCC1	0	217
CN1[C@@H](C)[C@@H](c2ccccc2)OCC1	0	218
O=C1N(CC)C[C@@H](CCN2CCOCC2)C1(c1ccccc1)c1ccccc1	0	219
O=C(NCC[C@H]1c2c3c(OCC3)ccc2CC1)CC	0	220
O=C(N)C([C@@H]1CN(CCc2cc3c(OCC3)cc2)CC1)(c1ccccc1)c1ccccc1	0	221
O=C(O)Cc1cc2/C(=C\CCN(C)C)/c3c(cccc3)COc2cc1	0	222
O=C1[C@H](N)CON1	0	223
O=C(OC)[C@H]1[C@@](O)(CC)C[C@H](O[C@@H]2O[C@@H](C)[C@@H](O[C@@H]3O[C@@H](C)[C@@H](O[C@@H]4O[C@@H](C)C(=O)CC4)[C@@H](O)C3)[C@@H](N(C)C)C2)c2c(O)c3C(=O)c4c(O)cccc4C(=O)c3cc12	0	224
O=C(C)[C@@]1(O)C[C@H](O[C@@H]2O[C@@H](C)[C@@H](O)[C@@H](N)C2)c2c(O)c3C(=O)c4c(OC)cccc4C(=O)c3c(O)c2C1	0	225
O=C(O)[C@@H]1[C@H](O)C[C@]2(O)O[C@@H]1C[C@@H](O[C@@H]1[C@@H](O)[C@@H](N)[C@H](O)[C@@H](C)O1)/C=C/C=C/C=C/C=C/CC/C=C/C=C/[C@H](C)[C@@H](O)[C@@H](C)[C@H](C)OC(=O)C[C@H](O)C[C@H](O)C[C@H](O)CC[C@@H](O)[C@H](O)C2	0	226
O=C(OC)[C@@H]1[C@@H]2[C@H]3[C@@](C)([C@@]4(OC(=O)CC4)CC3)C[C@H]3O[C@@]23[C@]2(C)C(=CC(=O)CC2)C1	0	227
O=C(CO)[C@]12[C@@]3(C)[C@@H]([C@@H]4[C@@H]([C@H](O)C3)[C@@]3(C)C(=CC(=O)C=C3)CC4)C[C@H]1OC(C)(C)O2	0	228
O=C(CO)[C@]12[C@]3(C)[C@H]([C@H]4[C@H]([C@@H](O)C3)[C@]3(C)C(=CC(=O)C=C3)CC4)C[C@H]1O[C@@H](CCC)O2	0	229
O(C[C@@H]1OC(=O)NC1)c1cc(C)cc(C)c1	0	230
N=C(NC[C@@H]1OC2(OC1)CCCCC2)N	0	231
O=C(N[C@@]1(C)C(=O)N2[C@H](Cc3ccccc3)C(=O)N3[C@H]([C@]2(O)O1)CCC3)[C@@H]1C=C2[C@H](N(C)C1)Cc1c3c([nH]c1)cccc23	0	232
O=C(O[C@@]12O[C@](NC(=O)[C@@H]3C=C4[C@H](N(C)C3)Cc3c5c([nH]c3)cccc45)(C)C(=O)N1[C@H](Cc1ccccc1)C(=O)N1[C@H]2CCC1)[C@@H](O)[C@@H](O)C(=O)O[C@@]12O[C@](NC(=O)[C@@H]3C=C4[C@H](N(C)C3)Cc3c5c([nH]c3)cccc45)(C)C(=O)N1[C@H](Cc1ccccc1)C(=O)N1[C@H]2CCC1	0	233
O=C(N[C@@]1(C)C(=O)N2[C@H](Cc3ccccc3)C(=O)N3[C@H]([C@]2(O)O1)CCC3)[C@H]1CN(C)[C@H]2[C@@H](c3c4c([nH]cc4C2)ccc3)C1	0	234
O=C(O)C=1Oc2c(c(OC[C@@H](O)COc3cc4C(=O)C=C(C(=O)O)Oc4cc3)ccc2)C(=O)C=1	0	235
O=C1C[C@@H]2[C@H](C(C)(C)Oc3c2c(O)cc(C(CCCCCC)(C)C)c3)CC1	0	236
O=C(O)[C@H](OCC)Cc1ccc(OCCN2c3c(Oc4c2cccc4)cccc3)cc1	0	237
O=C(N1CCN(c2nc(N)c3c(n2)cc(OC)c(OC)c3)CC1)[C@@H]1Oc2c(OC1)cccc2	0	238
Oc1c2[C@H]3[C@H](C(C)(C)Oc2cc(CCCCC)c1)CCC(C)=C3	0	239
O=C(O)C=1N(CC)c2c(CCC)c3OC(C(=O)O)=CC(=O)c3cc2C(=O)C=1	0	240
O=C(OCCN1CCCCC1)c1c2OC(c3ccccc3)=C(C)C(=O)c2ccc1	0	241
O(C)c1c2O[C@@H]3[C@]4(c2c(cc1)CN(C)CC4)C=C[C@H](O)C3	0	242
O(C)[C@]12[C@@H]([C@](O)(C(C)(C)C)C)C[C@@]3([C@@H]4N(CC5CC5)CC[C@@]53[C@H]1Oc1c(O)ccc(c51)C4)CC2	0	243
O=C(O[C@@H]1[C@H](C)[C@H](O)[C@H](C)[C@H](O)[C@H](C)/C=C\C=C(\C)/C(=O)Nc2c(O)c3c(O)c(C)c4O[C@@](C)(C(=O)c4c3c3nc4n(c23)C=CC(C)=C4)O/C=C\[C@@H](OC)[C@H]1C)C	0	244
O=C(O[C@H]1[C@H](C)[C@H](O)[C@H](C)[C@@H](O)[C@@H](C)/C=C/C=C(/C)\C(=O)Nc2c(O)c3c(O)c(C)c4O[C@@](C)(C(=O)c4c3c(O)c2)O/C=C/[C@H](OC)[C@H]1C)C	0	245
O(CCOCCCC)CCOCc1c(CCC)cc2OCOc2c1	0	246
O=C1N(C)CC(=O)N2[C@@H](c3cc4OCOc4cc3)c3[nH]c4c(c3C[C@@H]12)cccc4	0	247
O=C(C(C)(C)c1cnccc1)c1cnccc1	0	248
O=C([C@@H](N(CC)CC)C)c1ccccc1	0	249
O=C(N(C)C)Cc1c(-c2ccc(C)cc2)nc2n1C=C(C)C=C2	0	250
O=C(N(c1ccccc1)C1CCN(CCc2ccccc2)CC1)CC	0	251
O=C(N(CC)c1cc(C=2n3ncc(C#N)c3N=CC=2)ccc1)C	0	252
O=C(N(C(=O)[C@@H]1CN(CC=C)[C@H]2[C@@H](c3c4c([nH]cc4C2)ccc3)C1)CCCN(C)C)NCC	0	253
O=C(NO)C	0	254
O=C(Nc1c(C)cccc1C)[C@H]1N(C)CCCC1	0	255
O=C(Nc1c(C)cccc1C)[C@H]1N(CCC)CCCC1	0	256
O=C(Nc1c(C)cccc1C)[C@H]1N(CCCC)CCCC1	0	257
O=C(Nc1c(C)cccc1C)CN(CC)CC	0	258
O=C([O-])C[N+](C)(C)C	0	259
O=C1C(=O)NC(=O)NC1=O	0	260
O=C(CO)[C@]1(O)[C@]2(C)[C@H]([C@@H]3[C@@H](C(=O)C2)[C@]2(C)C(=CC(=O)CC2)CC3)CC1	0	261
O=C(OC[C@H]1[C@]2(OC)N(C=3C(=O)C(C)=C(N)C(=O)C1=3)C[C@@H]1N[C@H]21)N	0	262
O=C1C=C2C(=C3[C@H](c4ccc(N(C)C)cc4)C[C@]4(C)[C@](O)(C#CC)CC[C@H]4[C@H]3CC2)CC1	0	263
O=C1C=C2[C@@H]([C@@H]3C(=C)C[C@]4(CC)[C@](O)(C#C)CC[C@@H]4[C@H]3CC2)CC1	0	264
O=C(C)[C@]1(O)[C@]2(C)[C@H]([C@@H]3[C@H]([C@]4(C)C(C(C)=C3)=CC(=O)CC4)CC2)CC1	0	265
O=C(O[C@@]1(C(=O)C)[C@]2(C)[C@H]([C@@H]3[C@H]([C@]4(C)C([C@@H](C)C3)=CC(=O)CC4)CC2)CC1)C	0	266
O=C1N(C)C(=O)C[C@]1(C)c1ccccc1	0	267
O=C1N(C)C(=O)c2[nH]cnc2N1C	0	268
O=C1N(C)C(=O)NC(=O)[C@]1([C@@H](C#CCC)C)CC=C	0	269
O=C1N(C)C(=O)N[C@@]1(CC)c1ccccc1	0	270
O=C1N(CC)C(=O)N[C@@H]1c1ccccc1	0	271
O=C1N([C@@H]2C3CCN(C2)CC3)C[C@@H]2c3c1cccc3CCC2	0	272
O=C(N(c1ccccc1)C1(COC)CCN(CCN2C(=O)N(CC)N=N2)CC1)CC	0	273
O=C1N(O)C(C2CCCCC2)=CC(C)=C1	0	274
O=C(OCC)[C@@H](N[C@@H]1C(=O)N(CC(=O)O)c2c(cccc2)CC1)CCc1ccccc1	0	275
O=C1N(c2c(C)cccc2)C(C)=Nc2c1cccc2	0	276
O=C(N1CC(=O)N2[C@H](c3c(cccc3)CC2)C1)C1CCCCC1	0	277
O=C(O)[C@@H](NC(=O)c1ccc(NC[C@H]2N(C=O)C=3C(=O)NC(N)=NC=3NC2)cc1)CCC(=O)O	0	278
O=C1NC(N)=NC=2NC[C@H]([C@H](O)[C@H](O)C)NC1=2	0	279
O=C(O)[C@@H](NC(=O)c1ccc(CCc2c3C(=O)NC(N)=Nc3[nH]c2)cc1)CCC(=O)O	0	280
O=C1NC(N)=Nc2n(CCC(CO)CO)cnc12	0	281
O=C(OC[C@H](OCn1c2N=C(N)NC(=O)c2nc1)CO)[C@H](N)C(C)C	0	282
O=C(O)[C@@H](NC(=O)c1ccc(NCc2nc3C(=O)NC(N)=Nc3nc2)cc1)CCC(=O)O	0	283
O=C1[C@](CC)(c2ccc(N)cc2)CCC(=O)N1	0	284
O=C1NC(=O)CN([C@H](CN2CC(=O)NC(=O)C2)C)C1	0	285
O=C1C([C@@H](CCC)C)(CC=C)C(=O)NC(=O)N1	0	286
O=C1C(CCC(C)C)(CC)C(=O)NC(=O)N1	0	287
O=C1C(C#N)=CC(c2ccncc2)=C(C)N1	0	288
O=C(NC(C)(C)C)[C@H]1[C@]2(C)[C@H]([C@H]3[C@@H]([C@]4(C)[C@H](NC(=O)C=C4)CC3)CC2)CC1	0	289
O=C(N/C=C/1\C(=O)N[C@@H]([C@@H]2NC(N)=NCC2)C(=O)NC[C@H](N)C(=O)N[C@H](CO)C(=O)N[C@H](CNC(=O)C[C@H](N)CCCN)C(=O)N\1)N	0	290
O=C1C(CC)(c2ccccc2)C(=O)NCN1	0	291
O=[N+]([O-])c1cc2C(c3ccccc3)=NCC(=O)Nc2cc1	0	292
O=C(O[C@H]1C(C)(C)[C@@H]2[C@](C)([C@@H]3C(=O)C=C4[C@](C)([C@]3(C)CC2)CC[C@@]2(C)[C@H]4C[C@@](C(=O)O)(C)CC2)CC1)CCC(=O)O	0	293
O=C1C(C/C=C(/CCC[C@@H](CCC[C@@H](CCCC(C)C)C)C)\C)=C(C)C(=O)c2c1cccc2	0	294
O=C(O)[C@@H](N)CCCNC(=N)N	0	295
O=C(O)[C@@H](N)Cc1c2c([nH]c1)cccc2	0	296
O=C(O)C1CCC(CN)CC1	0	297
O=C(O)CC[C@H](N)C=C	0	298
O=C(O)CCCCCCCC(=O)O	0	299
O=C(O)CCCCCN	0	300
O=C(O)CCN(C(=O)c1cc2nc(CNc3ccc(C(=N)N)cc3)n(C)c2cc1)c1ncccc1	0	301
O=C(O)[C@@H](N)CCC(=O)O	0	302
O=C(O)CN	0	303
O=C(O)CN(CC(=O)O)CCN(CC(=O)O)CC(=O)O	0	304
O=C(O)/C=C/c1nc(/C(=C/CN2CCCC2)/c2ccc(C)cc2)ccc1	0	305
O=C(O)c1ccc(N)cc1	0	306
O=C(O)c1ccc(C(=C)c2c(C)cc3C(C)(C)CCC(C)(C)c3c2)cc1	0	307
O=C(O)c1c(-c2ccc(Cn3c(CCC)nc4c(C)cc(-c5n(C)c6c(n5)cccc6)cc34)cc2)cccc1	0	308
O=C(O)[C@@H](O)C	0	309
O[C@@H]([C@@H](O)[C@@H](O)CO)[C@H](O)CO	0	310
O=C(O)c1n(Cc2ccc(-c3c(-c4[nH]nnn4)cccc3)cc2)c(CCC)nc1C(O)(C)C	0	311
OC(C)C	0	312
O=C(O)C(C)(C)c1ccc([C@@H](O)CCCN2CCC(C(O)(c3ccccc3)c3ccccc3)CC2)cc1	0	313
O[C@@H](CCCN1CCC(C(O)(c2ccccc2)c2ccccc2)CC1)c1ccc(C(C)(C)C)cc1	0	314
O=C([O-])C[C@H](O)C[N+](C)(C)C	0	315
O=C(O)C(O)(CC(=O)O)CC(=O)O	0	316
O[C@](CCN1CCCC1)(c1ccccc1)C1CCCCC1	0	317
O[C@](CCN1CCCCC1)([C@H]1[C@@H]2C=C[C@H](C1)C2)c1ccccc1	0	318
O[C@](CCN1CCCCC1)(c1ccccc1)C1CCCCC1	0	319
O[C@@H](N)CCc1ccccc1	0	320
O=C(O)O	0	321
O=C(OCCN(C)C)[C@@H](c1ccccc1)C1(O)CCCC1	0	322
O=C(N)C=1C(=O)[C@@]2(O)C(O)=C3C(=O)c4c(O)cccc4[C@](O)(C)[C@H]3[C@H](O)[C@@H]2[C@H](N(C)C)C=1O	0	323
OC1C(O)C(O)C(O)C(O)C1O	0	324
OC[C@H]1N(CCCC)C[C@@H](O)[C@@H](O)[C@H]1O	0	325
OCCN1[C@H](CO)[C@H](O)[C@H](O)[C@H](O)C1	0	326
O=C(CC)[C@@]1(C)[C@@H](C)C[C@@H]2[C@]1(C)C[C@H](O)[C@@H]1[C@]3(C)C(=CC(=O)C=C3)CC[C@@H]21	0	327
O=C(O)CCCCCC[C@H]1[C@@H](/C=C/[C@H](O)CCCCC)[C@@H](O)CC1=O	0	328
O=C(OC)CCCCCC[C@H]1[C@@H](/C=C/C[C@](O)(CCCC)C)[C@@H](O)CC1=O	0	329
O=C(O)CCC/C=C\C[C@H]1[C@@H](/C=C/[C@H](O)CCCCC)[C@@H](O)CC1=O	0	330
O=C(O)CCC/C=C\C[C@H]1[C@@H](CCC(=O)CCCCCCC)[C@@H](O)C[C@H]1O	0	331
O=C(OC(C)C)CCC/C=C\C[C@@H]1[C@H](CC[C@@H](O)CCc2ccccc2)[C@H](O)C[C@@H]1O	0	332
O=C(NCC)CCC/C=C\C[C@@H]1[C@H](/C=C/[C@@H](O)CCc2ccccc2)[C@H](O)C[C@@H]1O	0	333
O=C(O)CCC/C=C\C[C@H]1[C@@H](/C=C/[C@@](O)(CCCCC)C)[C@H](O)C[C@H]1O	0	334
OC([C@@H](/C=C/[C@H](C)[C@@H]1[C@]2(C)[C@H](/C(=C/C=C\3/C[C@@H](O)C[C@@H](O)C/3)/CCC2)CC1)C)(C)C	0	335
O[C@H](/C=C/[C@H](C)[C@@H]1[C@]2(C)[C@H](/C(=C/C=C\3/C(=C)[C@H](O)C[C@H](O)C/3)/CCC2)CC1)C1CC1	0	336
O=C(OC)[C@H]1[C@@H](O)CC[C@@H]2[C@@H]1C[C@@H]1N(C2)CCc2c3c([nH]c12)cccc3	0	337
O[C@@H]1C/C(=C\C=C/2\[C@H]3[C@@](C)([C@@H]([C@@H](CCCC(C)C)C)CC3)CCC\2)/C(=C)CC1	0	338
O[C@@H]1C/C(=C\C=C/2\[C@H]3[C@@](C)([C@@H]([C@@H](/C=C/[C@@H](C(C)C)C)C)CC3)CCC\2)/C(=C)CC1	0	339
O=C(C)[C@H]1[C@]2(C)[C@H]([C@H]3[C@H]([C@H](O)C2)[C@]2(C)C([C@@H](C)C3)=CC(=O)CC2)CC1	0	340
O=C(N(CC)Cc1ccncc1)[C@@H](CO)c1ccccc1	0	341
OCC(N)(CO)CO	0	342
O=C(N[C@H](CO)C)[C@@H]1C=C2[C@@H](N(C)C1)Cc1c3c([nH]c1)cccc23	0	343
O=C(N[C@H](CO)CC)[C@@H]1C=C2[C@@H](N(C)C1)Cc1c3c([nH]c1)cccc23	0	344
O=C(N[C@H](CO)CC)[C@@H]1C=C2[C@@H](N(C)C1)Cc1c3c(n(C)c1)cccc23	0	345
OCCCCCCCCCCCCCCCCCCCCCC	0	346
OCCN	0	347
OCCN(CCO)c1nc(N2CCCCC2)c2nc(N(CCO)CCO)nc(N3CCCCC3)c2n1	0	348
O=C(O)CCC/C=C\1/C[C@@H]2[C@@H](/C=C/[C@@H](O)[C@@H](CC#CC)C)[C@H](O)C[C@@H]2C/1	0	349
O[C@H]([C@@H](N)C)c1ccccc1	0	350
O=C(O)CCC/C=C/1\O[C@H]2[C@H]([C@@H](/C=C/[C@H](O)CCCCC)[C@@H](O)C2)C\1	0	351
OCc1c(O)c(C)ncc1CO	0	352
Oc1c(C(C)C)cccc1C(C)C	0	353
Oc1c(O)ccc2c1-c1c3[C@H](N(C)CCc3ccc1)C2	0	354
Oc1cc(N(CC2=NCCN2)c2ccc(C)cc2)ccc1	0	355
O[C@H](CNC(C)(C)C)c1cc(O)cc(O)c1	0	356
O[C@H](CNC(C)C)c1cc(O)cc(O)c1	0	357
O[C@H](CN)c1cc(O)c(O)cc1	0	358
O[C@H](CNC)c1cc(O)c(O)cc1	0	359
O[C@H](CNC(C)C)c1cc(O)c(O)cc1	0	360
Oc1c(O)ccc(C[C@@H]([C@H](Cc2cc(O)c(O)cc2)C)C)c1	0	361
O=C(O)[C@@H](N)Cc1cc(O)c(O)cc1	0	362
Oc1c(O)ccc(CCN)c1	0	363
Oc1c(O)ccc(CCN[C@H](CCc2ccc(O)cc2)C)c1	0	364
O=C(O)[C@@](NN)(Cc1cc(O)c(O)cc1)C	0	365
Oc1cc2c(cc1)C[C@H]1N(CC3CCC3)CC[C@@]32[C@@]1(O)CCCC3	0	366
Oc1cc2[C@@]3(C)[C@@H](C)[C@H](N(C/C=C(\C)/C)CC3)Cc2cc1	0	367
Oc1cc2[C@]3(C)[C@@H](N)[C@@H](Cc2cc1)CCCCC3	0	368
O=C(O)[C@@](N)(Cc1ccc(O)cc1)C	0	369
Oc1c([C@@H](CCN(C(C)C)C(C)C)c2ccccc2)cc(C)cc1	0	370
O[C@@H](CNC(C)(C)C)c1cc(CO)c(O)cc1	0	371
O(CCCCCCNC[C@@H](O)c1cc(CO)c(O)cc1)CCCCc1ccccc1	0	372
O[C@H](CNC(C)(C)C)c1nc(CO)c(O)cc1	0	373
O=C(OC)c1c(O)cccc1	0	374
P(=O)(O)(O)C(=O)O	0	375
P(=O)(O)(O)C(P(=O)(O)O)(O)CCN(CCCCC)C	0	376
P(=O)(OCN1C(=O)C(c2ccccc2)(c2ccccc2)NC1=O)(O)O	0	377
S(=O)(=O)(CCc1cc2c(C[C@H]3N(C)CCC3)c[nH]c2cc1)c1ccccc1	0	378
S(=O)(=O)(CCn1c(C)ncc1[N+](=O)[O-])CC	0	379
S(=O)(=O)(N(CCC)CCC)c1ccc(C(=O)O)cc1	0	380
S(=O)(=O)(N)c1c(Oc2ccccc2)c(NCCCC)cc(C(=O)O)c1	0	381
S(=O)(=O)(N)c1c(OC)ccc(C[C@@H](NCCOc2c(OCC)cccc2)C)c1	0	382
S(=O)(=O)(N)c1ccc(CN)cc1	0	383
S(=O)(=O)(Cc1cc2c(CCN(C)C)c[nH]c2cc1)N1CCCC1	0	384
S(=O)(=O)(N1CCN(CC)CC1)c1cc(c(OCC)cc1)C1=Nn2c(CCC)nc(C)c2C(=O)N1	0	385
S(=O)(=O)(NC(=O)C)c1ccc(N)cc1	0	386
S(=O)(=O)(NC(=O)NC(C)C)c1c(Nc2cc(C)ccc2)ccnc1	0	387
S(=O)(=O)(NC(=O)c1ccccc1)c1ccc(N)cc1	0	388
S(=O)(=O)(N[C@H](C(=O)O)Cc1ccc(OCCCCC2CCNCC2)cc1)CCCC	0	389
S(=O)(=O)(NC)Cc1cc2c(CCN(C)C)c[nH]c2cc1	0	390
S(=O)(=O)(Nc1ccc([C@H](O)CCCN(CCCCCCC)CC)cc1)C	0	391
S(=O)(=O)(Nc1ccc([C@@H](O)CNC(C)C)cc1)C	0	392
S(=O)(=O)(Nc1ccc(OCCN(CCc2ccc(NS(=O)(=O)C)cc2)C)cc1)C	0	393
S(=O)(=O)(Nc1c(OC)c(OC)ncn1)c1ccc(N)cc1	0	394
S(=O)(=O)(Nc1c(C)c(C)no1)c1ccc(N)cc1	0	395
S(C(=O)[C@@]1(O)[C@@H](C)C[C@@H]2[C@]1(C)C[C@H](O)[C@]1(F)[C@]3(C)C([C@H](F)C[C@@H]21)=CC(=O)C=C3)CF	0	396
S(C(Sc1cc(C(C)(C)C)c(O)c(C(C)(C)C)c1)(C)C)c1cc(C(C)(C)C)c(O)c(C(C)(C)C)c1	0	397
S(C)[C@H]1[C@@H](O)[C@@H](O)[C@@H](O)[C@@H]([C@@H](NC(=O)[C@@H]2N(C)C[C@@H](CCC)C2)[C@H](O)C)O1	0	398
S(CC1=C(C(=O)O)N2C(=O)[C@@](OC)(NC(=O)[C@@H](C(=O)O)c3ccc(O)cc3)[C@H]2OC1)c1n(C)nnn1	0	399
S(=O)(=O)(Oc1ccc(C[C@@H](NC(=O)[C@@H](N)CC(=O)O)C(=O)N[C@@H](C(=O)NCC(=O)N[C@H](C(=O)N[C@H](C(=O)N[C@H](C(=O)N[C@H](C(=O)N)Cc2ccccc2)CC(=O)O)CCSC)Cc2c3c([nH]c2)cccc3)CCSC)cc1)O	0	400
S(=O)(=O)(O)CCCNC(=O)C	0	401
S(=O)(=O)(O)CCS	0	402
S(=O)(=O)(OC[C@@H]1[C@@H](O[C@H]2[C@H](O)[C@@H](O)[C@H](O[C@@H]3[C@H](NS(=O)(=O)O)[C@@H](O)[C@H](O)[C@@H](COS(=O)(=O)O)O3)[C@@H](C(=O)O)O2)[C@H](OS(=O)(=O)O)[C@@H](NS(=O)(=O)O)[C@@H](O[C@H]2[C@H](O)[C@@H](OS(=O)(=O)O)[C@H](O[C@H]3[C@H](O)[C@@H](NS(=O)(=O)O)[C@@H](OC)O[C@@H]3COS(=O)(=O)O)O[C@H]2C(=O)O)O1)O	0	403
S=P(S[C@@H](C(=O)OCC)CC(=O)OCC)(OC)OC	0	404
S(P(=O)(O)O)CCNCCCN	0	405
O=C(Nc1noc(C)c1)C=1N(C)S(=O)(=O)c2c(C=1O)cccc2	0	406
O=C(N[C@@H]1C(=O)N[C@H](CCCN)C(=O)N[C@@H]([C@H](CC)C)C(=O)N[C@H](Cc2ccccc2)C(=O)N[C@H](Cc2[nH]cnc2)C(=O)N[C@H](CC(=O)O)C(=O)N[C@H](CC(=O)N)C(=O)NCCCC1)[C@@H](NC(=O)[C@@H](NC(=O)[C@@H](NC(=O)[C@@H]1SC([C@H](N)[C@@H](CC)C)=NC1)CC(C)C)CCC(=O)O)[C@H](CC)C	0	407
O=C(N[C@H]1C(=O)N2C(C(=O)O)=C(C)CS[C@@H]12)[C@@H](N)C1=CCC=CC1	0	408
S(CC(=O)N[C@H]1C(=O)N2C(C(=O)O)=C(COC(=O)C)CS[C@@H]12)c1ccncc1	0	409
O=C(O)[C@H](C(=O)N[C@H]1C(=O)N2[C@@H](C(=O)O)C(C)(C)S[C@@H]12)c1ccccc1	0	410
O=C(N[C@@H]1C(=O)N2[C@H](C(=O)O)C(C)(C)S[C@@H]12)[C@H](N)c1ccccc1	0	411
O=C(N[C@H]1C(=O)N2[C@@H](C(=O)O)C(C)(C)S[C@@H]12)[C@@H](NC(=O)N1C(=O)NCC1)c1ccccc1	0	412
O=C(N[C@@H]1C(=O)N2[C@@H](C(=O)O)C(C)(C)S[C@@H]12)COc1ccccc1	0	413
O=C(N[C@@H]1C(=O)N2[C@@H](C(=O)O)C(C)(C)S[C@@H]12)Cc1ccccc1	0	414
O=C(O)[C@@H]1C(C)(C)S[C@@H]2[C@H](NC(=O)c3c(OCC)ccc4c3cccc4)C(=O)N12	0	415
FC=1C(N)=NC(=O)N([C@@H]2O[C@@H](CO)SC2)C=1	0	416
O=C(OCC)c1cnc(C#Cc2cc3C(C)(C)CCSc3cc2)cc1	0	417
O=C(NCC(=O)N)[C@@H](NC(=O)[C@H]1N(C(=O)[C@@H]2NC(=O)[C@@H](CC(=O)N)NC(=O)[C@@H](CCC(=O)N)NC(=O)[C@@H]([C@@H](CC)C)NC(=O)[C@@H](Cc3ccc(O)cc3)NC(=O)[C@@H](N)CSSC2)CCC1)CC(C)C	0	418
O=C(O)C[C@@H]1C(=O)N[C@H](Cc2c3c([nH]c2)cccc3)C(=O)N2[C@H](C(=O)N[C@@H](C(=O)N)CSSCCC(=O)N[C@H](CCCCNC(=N)N)C(=O)NCC(=O)N1)CCC2	0	419
O=C(OCC1=C(C(=O)O)N2C(=O)[C@@H](NC(=O)/C(=N/OC)/c3occc3)[C@H]2SC1)N	0	420
S(CC1=C(C(=O)O)N2C(=O)[C@@H](NC(=O)[C@H](NC(=O)N3C(=O)C(=O)N(CC)CC3)c3ccc(O)cc3)[C@H]2SC1)c1n(C)nnn1	0	421
S(=O)(=O)(O)Cn1c(SCC2=C(C(=O)O)N3C(=O)[C@@H](NC(=O)[C@H](O)c4ccccc4)[C@H]3SC2)nnn1	0	422
O=C(N[C@@H]1C(=O)N2C(C(=O)O)=C(/C=C/C)CS[C@H]12)[C@H](N)c1ccc(O)cc1	0	423
S(=O)(=O)(N)C=1S/C(=N\C(=O)C)/N(C)N=1	0	424
S(CC1=C(C(=O)O)N2C(=O)[C@@](OC)(NC(=O)C3S/C(=C(/C(=O)O)\C(=O)N)/S3)[C@H]2SC1)c1n(C)nnn1	0	425
O=C(OCC)Nc1cc2N(C(=O)CCN3CCOCC3)c3c(Sc2cc1)cccc3	0	426
N([C@H](CN1c2c(Sc3c1cccc3)cccc2)C)(C)C	0	427
N(CCCN1c2c(Sc3c1cccc3)cccc2)(C)C	0	428
FC(F)(F)c1cc2N(CCCN3CCN(CCO)CC3)c3c(Sc2cc1)cccc3	0	429
S(=O)(=O)(N(C)C)c1cc2/C(=C\CCN3CCN(C)CC3)/c3c(Sc2cc1)cccc3	0	430
FC(F)(F)c1cc2/C(=C\CCN3CCN(CCO)CC3)/c3c(Sc2cc1)cccc3	0	431
SC[C@H](NC(=O)C)C(=O)O	0	432
SCCN	0	433
[O-][n+]1c(N)nc(N2CCCCC2)cc1N	0	434
N(CCc1c2c([nH]c1)ccc(Cn1ncnc1)c2)(C)C	0	435
[C@@H](C)(c1c(C)c(C)ccc1)c1[nH]cnc1	0	436
C(Cc1n2c(nn1)CCCC2)N1CCN(c2c(C)cccc2)CC1	0	437
Nc1c(-c2ccccc2)nc2c(N)nc(N)nc2n1	0	438
N(C)(C)c1nc(N(C)C)nc(N(C)C)n1	0	439
Nc1nc2c(c3n(CC(C)C)cnc13)cccc2	0	440
CN1[C@H](c2cnccc2)CCC1	0	441
N(\[C@@H](C(C)(C)C)C)=C(\NC#N)/Nc1ccncc1	0	442
O=C(N1CCN(c2nc(N)c3c(n2)cc(OC)c(OC)c3)CC1)c1occc1	0	443
O=C(NNCc1ccccc1)c1noc(C)c1	0	444
O=C(OC(C)C)C=1[C@@H](c2c3nonc3ccc2)C(C(=O)OC)=C(C)NC=1C	0	445
O=[N+]([O-])c1sc(NC(=O)c2c(OC(=O)C)cccc2)nc1	0	446
N(CCC)[C@H]1Cc2sc(N)nc2CC1	0	447
S(=O)(=O)(N)c1sc2S(=O)(=O)[C@H](C)C[C@@H](NCC)c2c1	0	448
S(=O)(=O)(N)c1sc2S(=O)(=O)N(CCCOC)C[C@H](NCC)c2c1	0	449
CN1CC/C(=C\2/c3c(scc3)CCc3c/2cccc3)/CC1	0	450
O=C1c2sccc2/C(=C\2/CCN(C)CC/2)/c2c(cccc2)C1	0	451
O=C(c1c(-c2ccc(O)cc2)sc2c1ccc(O)c2)c1ccc(OCCN2CCCCC2)cc1	0	452
O=C(Nc1c(C(=O)OC)scc1C)[C@@H](NCCC)C	0	453
O=C(N[C@@H]1C(=O)N2C(C(=O)O)=CCS[C@H]12)/C(=C/CC(=O)O)/c1nc(N)sc1	0	454
S(=O)(=O)(O)N1[C@@H](C)[C@H](NC(=O)/C(=N\OC(C(=O)O)(C)C)/c2nc(N)sc2)C1=O	0	455
O(/N=C(\C(=O)N[C@@H]1C(=O)N2C(C(=O)[O-])=C(C[n+]3ccccc3)CS[C@H]12)/c1nc(N)sc1)C(C(=O)O)(C)C	0	456
O=C(N[C@@H]1C(=O)N2C(C(=O)O)=C(COC)CS[C@H]12)/C(=N\OC)/c1nc(N)sc1	0	457
O=C(N[C@@H]1C(=O)N2C(C(=O)[O-])=C(C[N+]3(C)CCCC3)CS[C@H]12)/C(=N\OC)/c1nc(N)sc1	0	458
O=C(O)[C@@H]1CN(CC/C=C(\c2c(C)ccs2)/c2c(C)ccs2)CCC1	0	459
O=C(OC)Nc1[nH]c2c(n1)ccc(C(=O)c1sccc1)c2	0	460
O=C(O)[C@@H](C)c1ccc(C(=O)c2sccc2)cc1	0	461
O([C@H]1[C@H](O)[C@H](O)[C@H]2O[C@@H](c3sccc3)OC[C@@H]2O1)[C@H]1[C@H]2[C@H]([C@H](c3cc(OC)c(O)c(OC)c3)c3c1cc1OCOc1c3)C(=O)OC2	0	462
O=C(OCC1=C(C(=O)O)N2C(=O)[C@@](OC)(NC(=O)Cc3sccc3)[C@H]2SC1)N	0	463
O=C(N(c1ccccc1)C1(COC)CCN(CCc2sccc2)CC1)CC	0	464
O=C(O)/C(=C/c1n(Cc2ccc(C(=O)O)cc2)c(CCCC)nc1)/Cc1sccc1	0	465
C(=C/C=1N(C)CCCN=1)\c1sccc1	0	466
O=C1N(C)C(=O)CC1c1ccccc1	0	467
O=C1C2(C)C(C3C(C4C(=CC(=O)CC4)CC3)CC2)CC1	0	468
FC(F)(CCC)C	0	469
Clc1c(Cl)cc2Oc3c(Oc2c1)cc(Cl)c(Cl)c3	0	470
Clc1c(Cl)ccc(N2C(=O)CCC2=O)c1	0	471
Clc1c(O)c(Cl)cc(N)c1	0	472
O=C(C)c1cc2N(CCCN(C)C)c3c(Sc2cc1)cccc3	0	473
O=C(C)c1cc2N(CC(N(C)C)C)c3c(Sc2cc1)cccc3	0	474
O=C(O)C	0	475
P(=O)(OCC1C(O)C(O)C(n2c3ncnc(N)c3nc2)O1)(O)O	0	476
Clc1cc2C(c3ccccc3)=NCc3n(c(CN(C)C)nn3)-c2cc1	0	477
OC1C(=C)/C(=C\C=C\2/C3C(C)(C(C(CCCC(C)C)C)CC3)CCC/2)/CC(O)C1	0	478
OC1(CC=C)C2(C)C(C3C(C4C(=CCCC4)CC3)CC2)CC1	0	479
O(CC(O)CNC(C)C)c1c(CC=C)cccc1	0	480
Brc1c(N)c(CNC2CCC(O)CC2)cc(Br)c1	0	481
O=NOCCCCC	0	482
OC(CNCCCCc1ccc(O)cc1)c1cc(O)c(O)cc1	0	483
O=C1C(O)=C(O)C([C@@H](O)CO)O1	0	484
O=C(NC1C(=O)N2C(C(=O)O)C(C)(C)SC12)C(N=[N+]=[N-])c1ccccc1	0	485
O=C(c1ccccc1)c1ccccc1	0	486
O=C(O)C(N)CCCCNC(=O)C(NC(=O)Cc1ccccc1)C1SC(C)(C)C(C(=O)O)N1	0	487
NCCc1n[nH]cc1	0	488
N(=C(/NCc1ccccc1)\NC)\C	0	489
O(CC(O)CNCCc1cc(OC)c(OC)cc1)c1cc(C)ccc1	0	490
O=C(OC(COc1c2c([nH]c(C)c2)ccc1)CNC(C)(C)C)c1ccccc1	0	491
Brc1ccc(C(OCCN(C)C)c2ccccc2)cc1	0	492
Clc1ccc(C(N2CCN(Cc3ccc(C(C)(C)C)cc3)CC2)c2ccccc2)cc1	0	493
Clc1c(OCC(O)CNC(C)(C)C)cc(C)cc1	0	494
O[C@@H](/C=C/[C@@H](C)C1[C@]2(C)[C@@H](/C(=C/C=C\3/C(=C)[C@H](O)C[C@H](O)C/3)/CCC2)CC1)C1CC1	0	495
O=C(O)C(O)C(O)C(O)C(O)C(O)CO	0	496
O=C(Oc1cc2c(cc1)CCC2)C(COCCOC)CC1(C(=O)NC2CCC(C(=O)O)CC2)CCCC1	0	497
O=C(O)CCCCCCC	0	498
O=C(O)CCC/C=C/CC1C(/C=C/C(O)(CCCCC)C)C(O)CC1O	0	499
O=C(CC)c1cc2N(CCN3CCN(CCO)CC3)c3c(Sc2cc1)cccc3	0	500
O=C(NC1C(=O)N2C(C(=O)O)=C(COC(=O)C)CSC12)CC#N	0	501
O=C(NC1C(=O)N2C(C(=O)O)=C(COC(=O)C)CSC12)C(N)c1ccccc1	0	502
O=C(N)C1C(C(=O)CC/C=C/C/C=C/C)O1	0	503
ClC(Cl)C(=O)N[C@@H]([C@H](O)c1ccc([N+](=O)[O-])cc1)COC(=O)CCC(=O)O	0	504
Clc1ccc(C(N2CCN(C)CC2)c2ccccc2)cc1	0	505
ClC(N)C	0	506
Clc1ccc(CN(CCN(C)C)c2ncccc2)cc1	0	507
Clc1ccc(CC(N)(C)C)cc1	0	508
S(CC(N)C(=O)O)CCCC/C=C(/NC(=O)C1C(C)(C)C1)\C(=O)O	0	509
O=C(O)C(CC(=O)Nc1cc(/C=C/c2scc(C3CCC3)n2)ccc1)(CC)CC	0	510
O=[N+]([O-])c1c(N)cc(OCC)c(C(=O)NC2CCN(CC3CC=CCC3)CC2)c1	0	511
Clc1cc2C(c3c(F)cccc3)=NC(O)C(=O)N(CCC#N)c2cc1	0	512
ClC12C3(C)C(C(F)CC1C1C(C)(C(C(=O)CO)C(C)C1)CC2O)=CC(=O)C=C3	0	513
Clc1c2C(O)(C)C3C(C(=O)c2c(O)cc1)=C(O)C1(O)C(O)=C(C(=O)NCO)C(=O)C(N(C)C)C1C3	0	514
OC(CCN1CCCCC1)(c1ccccc1)C1CCCC1	0	515
S(=O)(=O)(CCN(CC)CC)C1C2C(=O)OC(C(C)C)C(C)/C=C\C(=O)NC/C=C\C(\C)=C\C(O)CC(=O)Cc3occ(C(=O)N2CC1)n3	0	516
N=C(N)N1Cc2c(cccc2)CC1	0	517
O=C(OC1C(OC)C(C(=O)OC)C2C(C1)CN1C(c3[nH]c4c(c3CC1)cccc4)C2)c1cc(OC)c(OC)c(OC)c1	0	518
O=C(O)CC[C@@H](C)[C@@H]1[C@]2(C)[C@@H](O)C[C@@H]3[C@@]4(C)[C@@H](C[C@H](O)CC4)CC[C@H]3[C@@H]2CC1	0	519
ClC(Cl)C(=O)O	0	520
Cl/C(/SCC(N)C(=O)O)=C\Cl	0	521
O=C1C(CC2=C(O)Oc3c(C2=O)cccc3)=C(O)Oc2c1cccc2	0	522
FC12C3(C)C(C(F)CC1C1C(C)(C(OC(=O)C)(C(=O)COC(=O)C)C(C)C1)CC2O)=CC(=O)C=C3	0	523
OC1C/C(=C/C=C/2\C3C(C)(C(C(/C=C/C(C(C)C)C)C)CC3)CCC\2)/C(C)CC1	0	524
ClC(Cl)C(=O)N(C)c1ccc(OC(=O)c2occc2)cc1	0	525
O=C(O)CCC/C=C\C[C@@H]1[C@@H](/C=C/[C@@H](O)CCCCC)[C@H](O)C[C@@H]1O	0	526
O[C@@H]1C(=C)/C(=C\C=C\2/[C@H]3[C@@](C)(C([C@@H](/C=C/[C@@H](C(C)C)C)C)CC3)CCC/2)/C[C@@H](O)C1	0	527
O=C(O[C@@H]1[C@]2(C)[C@H]([C@H]3[C@@H]([C@]4(C)[C@H](CC(=O)[C@H](C)C4)CC3)CC2)CC1)CC	0	528
O=C1OC2(C3(C)C(C4C(C5(C)C(=CC(=O)CC5)C5C4C5)CC3)C3C2C3)CC1	0	529
O=C1C(C)CC2(C)C3C(C4C(C)(C(O)CC4)CC3)CCC2C1	0	530
O(CC)c1c(OCC)ccc(/C=C\2/NCCc3c/2cc(OCC)c(OCC)c3)c1	0	531
O[C@@H]1C/C(=C/C=C/2\[C@H]3[C@@](C)([C@@H]([C@@H](/C=C/[C@@H](C(C)C)C)C)CC3)CCC\2)/C(=C)CC1	0	532
O=[N+](OC(C(O[N+](=O)[O-])CO[N+](=O)[O-])CO[N+](=O)[O-])[O-]	0	533
O=C(O)CCCCCCC/C=C\CCCCCCCC	0	534
O=C(OC1(C#C)CCCCC1)N	0	535
O1CC1	0	536
O(CC)c1c2OC3C(O)C=CC4C53c2c(cc1)CC4N(C)CC5	0	537
N(CC)C1C(c2ccccc2)C2CC1CC2	0	538
O=C(O)/C=C/C(=O)O	0	539
Clc1cc2C(c3c(F)cccc3)=NCC(=O)N(C)c2cc1	0	540
FC12C3(C)C(C(F)CC1C1C(C)(C(O)(C(=O)COC(=O)C(C)(C)C)C(C)C1)CC2O)=CC(=O)C=C3	0	541
FC(F)(F)c1cc2/C(=C/CCN3CCN(CCO)CC3)/c3c(Sc2cc1)cccc3	0	542
S(C(=O)[C@@]1(OC(=O)c2occc2)[C@H](C)C[C@@H]2[C@]1(C)C[C@H](O)[C@]1(F)[C@]3(C)C([C@@H](F)C[C@@H]21)=CC(=O)C=C3)CF	0	543
C(CC)Cc1n(Cc2cnc(-c3c(-c4n[nH]nn4)cccc3)cc2)nc(CCCC)n1	0	544
O=C1C(O)=C2C(C)(C3C(C4C(C)(C(=O)CC4)CC3)CC2)CC1	0	545
P(=O)(OCOc1c(C(C)C)cccc1C(C)C)(O)O	0	546
O=C(O)C(N(CC(=O)O)CCN(CC(=O)O)CCN(CC(=O)O)CC(=O)O)COCc1ccccc1	0	547
O=C(O)CN1CCN(C(C(O)CO)CO)CCN(CC(=O)O)CCN(CC(=O)O)CC1	0	548
O=C(O)CN1CCN(CC(=O)O)CCN(CC(O)C)CCN(CC(=O)O)CC1	0	549
O=C(O)CCCCCC/C=C/C/C=C/C/C=C/CCCCC	0	550
O=C1C(C)C2(O)C34C(=O)OC5C3(C3(C(O)C(=O)OC3O4)C(C(C)(C)C)C5)CC2O1	0	551
O=C1C(C)C2(O)C34C(=O)OC5C3(C(O)C2O1)C1(C(O)C(=O)OC1O4)C(C(C)(C)C)C5	0	552
O=C1C(C)C2(O)C34C(=O)OC5C(O)C(C(C)(C)C)C6(C(O)C(=O)OC6O3)C45C(O)C2O1	0	553
O=C1C(C)C2(O)C34C(=O)OC5C(O)C(C(C)(C)C)C6(C(O)C(=O)OC6O3)C45CC2O1	0	554
O=C1C(O)C23C(C(C)(C)C)C(O)C4OC(=O)C5(OC2O1)C34C(O)C1OC(=O)C(C)C51	0	555
S(=O)(=O)(NC(=O)NC1CCCCC1)c1ccc(CCN2C(=O)C(C)(C)c3c(C2=O)cc(OC)cc3)cc1	0	556
S(=O)(=O)(NC(=O)NN1CCCCCC1)c1ccc(CCNC(=O)c2noc(C)c2)cc1	0	557
S(=O)(=O)(Nc1ncc(OCCOC)cn1)c1ccccc1	0	558
O=C(NCCCCNCCCN)C(O)NC(=O)CCCCCC/N=C(\N)/N	0	559
ClCC(=O)[C@@]1(OC(=O)CC)[C@@H](C)C[C@@H]2[C@]1(C)C[C@H](O)[C@]1(F)[C@]3(C)C([C@@H](F)C[C@@H]21)=CC(=O)C=C3	0	560
O=C1C(CC)(C(=O)NC(=O)N1)C1=CCCCCC1	0	561
O(C)c1c(O)cc(C2Oc3c(c(O)cc(O)c3)C(=O)C2)cc1	0	562
O(CCO)C1C(O)C(OC)C(CO)OC1OC1C(O)C(O)C(OC2C(O)C(O)C(C)OC2CO)OC1COC1C(O)C(O)C(OC)C(CO)O1	0	563
Cl/C(/Cl)=C(/Cl)\C(\Cl)=C(/Cl)\Cl	0	564
Clc1c(Cc2c(Cl)c(Cl)cc(Cl)c2O)c(O)c(Cl)cc1Cl	0	565
O=C(OCCCCCC)CCC(=O)CN	0	566
O=C(OC(CNC1CCCCC1)C)c1ccccc1	0	567
O=C(O)CNC(=O)c1ccccc1	0	568
NCCc1nc[nH]c1	0	569
O=C(OCC(=O)C1(O)C2(C)C(C3C(C4(C)C(=CC(=O)CC4)CC3)C(O)C2)CC1)CN(CC)CC	0	570
O=C(O[C@@]1(C(=O)C)[C@]2(C)[C@H]([C@H]3[C@@H]([C@]4(C)C(=CC(=O)CC4)CC3)CC2)CC1)CCCCC	0	571
O=C(C(C)C)C12C(=O)C(C/C=C(\C)/C)(C(=O)C(C/C=C(\C)/C)=C1O)CC(C/C=C(\C)/C)C2(CC/C=C(\C)/C)C	0	572
O=C(O)CCC/C=C/C/C=C/C/C=C/C/C=C/C/C=C/CC	0	573
O=C(N)C1(CCCNC(C)C)c2c(-c3c1cccc3)cccc2	0	574
S(=O)(=O)(O)c1cc2c(O)c(C=3C(=O)c4c(N=3)ccc(S(=O)(=O)O)c4)[nH]c2cc1	0	575
Ic1ccc(CC(NC(C)C)C)cc1	0	576
Ic1c(C(CCCCCCCCC(=O)OCC)C)cccc1	0	577
P(F)(=O)(OC(C)C)OC(C)C	0	578
N(C(CN1c2ncccc2Sc2c1cccc2)C)(C)C	0	579
O=C(O)C(N)C	0	580
O=C(O)[C@@H](N)CCC/N=C(\N)/N	0	581
O=C(O)C(N)CC(=O)N	0	582
O=C(OC(C)C)CCC/C=C/C[C@@H]1[C@@H](CC[C@@H](O)CCc2ccccc2)[C@H](O)C[C@@H]1O	0	583
O=C(NCCCC(N)C(=O)O)N	0	584
S(SCC(N)C(=O)O)CC(N)C(=O)O	0	585
Oc1cc2c(cc1)CC1N(CC=C)CCC32C1CCCC3	0	586
OC(C(N)C)c1cc(O)c(O)cc1	0	587
O=C(O)[C@@H](N)Cc1nc[nH]c1	0	588
O=C(O)C(N)C(CC)C	0	589
O=C(O)C(N)CC(C)C	0	590
O=C(O)C(N)Cc1ccccc1	0	591
O=C(O)C1NCCC1	0	592
O=C(O)C(N)CO	0	593
O=C(O)C(N)C(O)C	0	594
O=C1c2c(NCCN(CC)CC)ccc(C)c2Sc2c1cccc2	0	595
Clc1cc(C(O)CN(CCCC)CCCC)c-2c(/C(=C/c3ccc(Cl)cc3)/c3c-2ccc(Cl)c3)c1	0	596
O=C(O)C(N)C(C)C	0	597
O=C(O)C(N)CCCCNCNC(=O)C1=C(O)C2(O)C(O)=C3C(=O)c4c(O)cccc4C(O)(C)C3CC2C(N(C)C)C1=O	0	598
O=C(O)c1c(O)cccc1	0	599
P(=O)(OCc1c(CN(CC(=O)O)CCN(CC(=O)O)Cc2c(O)c(C)ncc2COP(=O)(O)O)c(O)c(C)nc1)(O)O	0	600
Clc1ccc(C2(O)N3C(=NCC3)c3c2cccc3)cc1	0	601
O(C)c1ccc(CN(CCN(C)C)c2ncccc2)cc1	0	602
O(C)c1c(OC)cc(CCN)cc1OC	0	603
O=C(N)C=1C(=O)[C@@H](N(C)C)[C@@H]2[C@@H](O)[C@@H]3C(=C)c4c(c(O)ccc4)C(O)=C3C(=O)[C@]2(O)C=1O	0	604
O=C1N(C)C(=O)NC(=O)C1(CC)CC	0	605
O(C[C@@H]1[C@@H](OC)[C@H](OC)[C@@H](OC)[C@H](O[C@H]2[C@H](OC)[C@@H](OC)[C@H](O[C@H]3[C@H](OC)[C@@H](OC)[C@H](OC)O[C@@H]3COC)O[C@@H]2COC)O1)C	0	606
O=C(N[C@@]1(C)C(=O)N2[C@@H](Cc3ccccc3)C(=O)N3[C@H]([C@]2(O)O1)CCC3)[C@@H]1C=C2[C@H](N(C)C1)Cc1c3c(n(C)c1)cccc23	0	607
O=C(O)C(N)CN1C=C(O)C(=O)C=C1	0	608
N(CCN1CCOCC1)c1c(C)cc(-c2ccccc2)nn1	0	609
O=C(O)C(CC(=O)N1CC2C(C1)CCCC2)Cc1ccccc1	0	610
O=C(NC(C=O)C(O)C(O)C(O)CO)C	0	611
P(=O)(OP(=O)(OCC1C(O)C(O)C(N2C=C(C(=O)N)CC=C2)O1)O)(OCC1C(O)C(O)C(n2c3ncnc(N)c3nc2)O1)O	0	612
O=C(O)[C@@H]1[C@@H](O)C[C@]2(O)O[C@H]1C[C@@H](O[C@H]1[C@@H](O)[C@@H](N)[C@H](O)[C@@H](C)O1)/C=C\C=C\C=C/C=C\C[C@@H](C)OC(=O)/C=C\[C@H]1O[C@@H]1C[C@H](O)C2	0	613
Brc1cc(C(=O)OCC2CN(C)C3C(OC)(c4c5c(n(C)cc5C3)ccc4)C2)cnc1	0	614
O=[N+]([O-])c1c2c(c(O)cc1)nccc2	0	615
O/N=C/1\C=C2C(C3C(C4C(CC)(C(O)(C#C)CC4)CC3)CC2)CC\1	0	616
O=C(OC1(C#C)C2(CC)C(C3C(C4C(=C/C(=N\O)/CC4)CC3)CC2)CC1)C	0	617
O=C1OCC(C2C3(C)C(O)(C4C(C5(CO)C(O)(CC(OC6C(O)C(O)C(O)C(C)O6)CC5O)CC4)C(O)C3)CC2)=C1	0	618
Clc1c(/C(=N/OCc2c(Cl)cc(Cl)cc2)/Cn2cncc2)ccc(Cl)c1	0	619
O=C(OCCN(CC)CC)c1cc(OCCCC)c(N)cc1	0	620
O=C(OCC=1N(C)CCCN=1)C(O)(c1ccccc1)C1CCCCC1	0	621
Oc1ccc(N)cc1	0	622
FC1C=2C(C)(C3C(O)CC4(C)C(O)(C(=O)CO)C(C)CC4C3C1)C=CC(=O)C=2	0	623
P(=O)(OCCCCCNC(=O)C(NC(=O)OCCOC)CCCCNC(=O)OCCOC)(O)C	0	624
S(CC[C@H](NC(=O)[C@@H](NC(=O)CCNC(=O)OC(C)(C)C)Cc1c2c([nH]c1)cccc2)C(=O)N[C@H](C(=O)N[C@H](C(=O)N)Cc1ccccc1)CC(=O)O)C	0	625
O=C1[C@@H]2Oc3c(O)ccc4c3[C@@]32[C@](NCCCCC)([C@H](N(C)CC3)C4)C=C1	0	626
S(=O)(=O)(OC1C(OS(=O)(=O)O)C(O)COC1OC1C(OS(=O)(=O)O)C(OS(=O)(=O)O)C(O)OC1)O	0	627
FC(F)(F)C(F)(F)C(F)(F)C(F)(F)C(F)(F)C(F)(F)F	0	628
FC(F)(F)C(F)(F)C(F)(F)F	0	629
O=C(NC1C(=O)N2C(C(=O)O)=C(OC)CSC12)C(N)C1=CCC=CC1	0	630
N(=C(/NCCc1ccccc1)\N)\C(=N)N	0	631
P(=O)(OCC(N)C(=O)O)(OCC(OC(=O)CCC)COC(=O)CC)O	0	632
O=C1O[C@H]2[C@@H](C(O)(C)C)[C@@H]1[C@@]1(O)[C@@]3(C)[C@@H]2OC(=O)[C@@]23O[C@@H]2C1	0	633
O=C(OCCOCCN1CCCCC1)N1c2ncccc2Sc2c1cccc2	0	634
O=C(OCOC(=O)C1C(C)(C)SC2C(NC(=O)C(N)c3ccccc3)C(=O)N12)C(C)(C)C	0	635
O=C(OCOC(=O)C1C(C)(C)SC2C(/N=C/N3CCCCCC3)C(=O)N12)C(C)(C)C	0	636
O(CCOCCOCCOCCOCCO)CCOCCOCCOCCOCCCCCCCCCCCC	0	637
S(=O)(=O)(O)c1c(C=C)cccc1	0	638
O=C(C)[C@H]1[C@H](C#N)C[C@@H]2[C@@]1(C)CC[C@@H]1[C@@]3(C)C(=CC[C@@H]21)C[C@@H](O)CC3	0	639
Nc1cc2nc3c(cc2cc1)ccc(N)c3	0	640
IC=1C(=O)C(I)=CN(CC(=O)OCCC)C=1	0	641
O=Cc1c(O)c(C)ncc1CO	0	642
O=C(O)C(=O)C	0	643
O=C(NC)c1cn(-c2nc(N)c3ncn(CC[C@H]4C(O)C(O)[C@@H](CC)O4)c3n2)nc1	0	644
S(=O)(=O)(C(C)(C)C)CC(C(=O)NC(C(=O)NC(C(O)C(O)C1CC1)CC1CCCCC1)Cc1nc[nH]c1)Cc1ccccc1	0	645
Brc1c(OC)c(C(=O)NCC2N(CC)CCC2)c(OC)cc1	0	646
O=C(O[C@H]1[C@H](OC)[C@@H](C(=O)OC)[C@@H]2[C@H](C1)CN1[C@@H](c3[nH]c4c(c3CC1)ccc(OC)c4)C2)/C=C/c1cc(OC)c(OC)c(OC)c1	0	647
FC(F)(F)c1cc(/C(=N\OCCCCC(=O)O)/c2cnccc2)ccc1	0	648
O=C(NCN1CCCC1)C=1C(=O)[C@@H](N(C)C)[C@H]2[C@@](O)(C=1O)C(O)=C1C(=O)c3c(O)cccc3[C@](O)(C)[C@H]1C2	0	649
O=C(O)C=1C(=O)c2c(N(CC)C=1)cc(-c1ccncc1)cc2	0	650
C(C)(C)(C)c1cc2OC(C)Oc2cc1	0	651
Brc1c(-c2c(NS(=O)(=O)C(F)(F)F)cccc2)oc2c1cc(Cn1c(C(=O)N)c(C3CC3)nc1CC)cc2	0	652
N(CCCN)CCCCNCCCN	0	653
O=C(O)CCC(=O)O	0	654
S(=O)(=O)(Nc1nc(C)cc(C)n1)c1ccc(N)cc1	0	655
S(=O)(=O)(Nc1c(OC)nccn1)c1ccc(N)cc1	0	656
S(=O)(=O)(Nc1oc(C)c(C)n1)c1ccc(N)cc1	0	657
O=C1N(C)C(=O)C(C(CC)C)(CC=C)C(=O)N1C	0	658
O=C(O)c1ccc(C(=O)Nc2cc3C(C)(C)CCC(C)(C)c3cc2)cc1	0	659
O=C(O)C(C(=O)NC1(OC)C(=O)N2C(C(=O)O)C(C)(C)SC12)c1cscc1	0	660
O(CC(O)CNC(C)(C)C)c1c2SCCCc2ccc1	0	661
P(CCP(CCOCC)CCOCC)(CCOCC)CCOCC	0	662
S(=O)(=O)(N(C)C)c1cc2N(CCCN3CCN(C)CC3)c3c(Sc2cc1)cccc3	0	663
O=C1CC2=C(C3C(C(C)C2)C2C(C)(C(O)(C#C)CC2)CC3)CC1	0	664
F[C@]12[C@@H](O)C[C@]3(C)[C@@](O)(C(=O)COC(=O)C)[C@H](OC(=O)C)C[C@H]3[C@@H]1CCC=1[C@]2(C)C=CC(=O)C=1	0	665
O(CC1=NCCN1)c1c(C(C)C)ccc(C)c1	0	666
Ic1c(NC(=O)CCC)c(I)cc(I)c1CC(C(=O)O)CC	0	667
S(=O)(=O)(NCCC1N(C)CCC1)c1cc(c(OCCC)cc1)C1=Nc2c(CCC)nn(C)c2C(=O)N1	0	668
O=C(O)CCC/C=C/C[C@@H]1[C@@H](CCC(=O)CCCCCCC)[C@H](O)C[C@@H]1O	0	669
O[C@@H]1C/C(=C/C=C/2\[C@H]3[C@@](C)(C([C@@H](CCCC(C)C)C)CC3)CCC\2)/C(=C)CC1	0	670
O=C(OC)C12c3[nH]c4c(c3CCN3C1C(CC)CC(C2)C3)cc(OC)c(C1c2[nH]c3c(c2CC2N(C)C/C(=C/C)/C(C2C(=O)OC)C1)cccc3)c4	0	671
Clc1nc(SCC(=O)O)nc(Nc2c(C)c(C)ccc2)c1	0	672
OC1C=C(C)C(/C=C/C(=C/C=C/C(=C/C=C/C=C(/C=C/C=C(/C=C/C=2C(C)(C)CC(O)CC=2C)\C)\C)/C)/C)C(C)(C)C1	0	673
O[C@@H]1[C@@H](O)C(O)OC[C@H]1O	0	674
Clc1cc2/C(=C/CCN3CCN(CCO)CC3)/c3c(Sc2cc1)cccc3	0	675
O=C1c2c(O)cc(CO)cc2C(C2C(O)C(O)C(O)C(CO)O2)c2c1c(O)ccc2	0	676
Clc1cc2N(CCCN3CCN(CCOC(=O)C)CC3)c3c(Sc2cc1)cccc3	0	677
Clc1cc2/C(=C/CCCN3CCN(CCOC(=O)C)CC3)/c3c(Sc2cc1)cccc3	0	678
O(C)c1c(OC)cc2c(c1)C1N(CC(CC)C(CC3NCCc4c3cc(OC)c(O)c4)C1)CC2	0	679
S(=O)(=O)(O)c1ccc(N=NC=2C(=O)N(c3ccc(S(=O)(=O)O)cc3)NC=2C(=O)O)cc1	0	680
O(C)c1c(OC)cc2c(C(CC3C(CC)CN4C(c5c(cc(OC)c(OC)c5)CC4)C3)NCC2)c1	0	681
O=CNC	0	682
NCCN	0	683
[nH]1ncnc1	0	684
N1CCCC1	0	685
O=C(CC)C	0	686
O(CC)CC	0	687
O=C(O)CO	0	688
[SH0](=O)(C)C	0	689
O=C(OCC)C	0	690
OCCN(C)C	0	691
O=C(CO)CO	0	692
Cc1ccccc1	0	693
S=C(S)N	0	694
ClCC(=O)O	0	695
O=C(OC)C(=C)C	0	696
O=NOCCCC	0	697
O=C1N(C)SC=C1	0	698
C(C)N1CCOCC1	0	699
NC(CCCCC)C	0	700
ClC(Cl)(F)F	0	701
O(C)c1c(O)cccc1	0	702
S=C1N(O)C=CC=C1	0	703
c12c(cccc1)cccc2	0	704
Clc1ccc(O)cc1	0	705
c12c(cccc1)CCCC2	0	706
ClC(Cl)(Cl)F	0	707
O=C(O)CCCCCCN	0	708
O=C1Oc2c(cccc2)C=C1	0	709
ClC(Cl)(Cl)C=O	0	710
ClC(Cl)(Cl)CO	0	711
ClC=1SN(C)C(=O)C=1	0	712
O=C(O)C(O)C(O)C(=O)O	0	713
O=C(Oc1cc(C)ccc1)C	0	714
Oc1c(C(C)C)ccc(C)c1	0	715
Oc1ccc(CC(N)C)cc1	0	716
O=C(OC)c1ccc(O)cc1	0	717
N#CN/C(=N/C(CC)(C)C)/N	0	718
O=[N+]([O-])c1oc(/C=N/O)cc1	0	719
OCCC(CCCC(=C)C)C	0	720
NC=1OC(c2ccccc2)CN=1	0	721
O(C)c1c(O)ccc(CC=C)c1	0	722
O=C(N(C)C)Nc1ccccc1	0	723
O=C(N)c1c(OCC)cccc1	0	724
OC(C)(C)C1CCC(O)(C)CC1	0	725
Oc1c(C)cc(N)c2c1cccc2	0	726
Oc1c(C)cc(O)c2c1cccc2	0	727
Oc1cc2c(CCN)c[nH]c2cc1	0	728
ClC(Cl)(Cl)C(O)(C)C	0	729
S(=O)(=O)(O)NC1CCCCC1	0	730
O(C)c1c(CC(NC)C)cccc1	0	731
O(C)C1C(O)C(O)C(O)C(O)O1	0	732
OCC1(O)C(O)C(O)C(O)CO1	0	733
O=C(OCCC)c1ccc(O)cc1	0	734
O(C)c1cc(C(C)(C)C)c(O)cc1	0	735
O(CC(O)CO)c1c(C)cccc1	0	736
O=S1(=O)NC(=O)c2c1cccc2	0	737
Clc1c(CC(N)(C)C)cccc1	0	738
O=C(NC(=O)C(C(CC)C)CC)N	0	739
O=C(O)C(NC(=O)C)CCC(=O)N	0	740
NC(CC)Cc1c2c([nH]c1)cccc2	0	741
P(=O)(O)(O)C(P(=O)(O)O)O	0	742
O=C(OCC(C)C)c1ccc(N)cc1	0	743
Nc1c2c(nc3c1cccc3)cccc2	0	744
Oc1c(CCCCCC)ccc(O)c1	0	745
O=C1C2(C)C(C)(C(=O)O1)C1OC2CC1	0	746
N1(c2nc(N3CC3)nc(N3CC3)n2)CC1	0	747
Clc1c(OC)cc(Cl)c(OC)c1	0	748
C(c1cc2c(cc1)cccc2)C1=NCCN1	0	749
Clc1ccc(C(O)(C(O)(C)C)C)cc1	0	750
O=C(OC(COC(=O)C)COC(=O)C)C	0	751
Clc1c(OC)c(C(=O)O)c(Cl)cc1	0	752
O=C(N(CC)CC)c1cc(OC)c(O)cc1	0	753
O=C1C(C(CC)C)(CC=C)C(=O)NC(=O)N1	0	754
O=C1C(/C(=C/CC)/C)(CC)C(=O)NC(=O)N1	0	755
Clc1c(O)c2nc(C)ccc2c(Cl)c1	0	756
S=C1N(CC=C)C(=S)NC1CC(C)C	0	757
ClC(Cl)(Cl)COP(=O)(O)O	0	758
O=C1C(CC=C)(C(=O)NC(=O)N1)C1C=CCC1	0	759
N12C(C3CN4C(C(C1)C3)CCCC4)CCCC2	0	760
Fc1cc2C3(C(=O)NC(=O)N3)CCOc2cc1	0	761
BrC(C(=O)NC(=O)N)(CC)CC	0	762
O=C1N(C)C(=O)c2n(CC(O)C)cnc2N1C	0	763
S(SC(=S)N(C)C)C(=S)N(C)C	0	764
OCCCCCCCCCCCCCCCC	0	765
O=C(Oc1c2ncccc2ccc1)c1ccccc1	0	766
N(CC12c3c(cccc3)C(c3c1cccc3)CC2)C	0	767
O=C(O)C=1C(=O)c2c(N(CC)C=1)cc1OCOc1c2	0	768
O=C(OCCCN1C(C)CCCC1)c1ccccc1	0	769
O=C(OCC)C1(c2ccccc2)CCN(C)CCC1	0	770
N(CCN(Cc1cscc1)c1ncccc1)(C)C	0	771
O=C(OC1CC(C)(C)CC(C)C1)c1c(O)cccc1	0	772
Clc1c(Cl)c(Cl)c(O)c(Cl)c1Cl	0	773
OC(c1ccccc1)(c1ccccc1)C1NCCCC1	0	774
OCC1C(O)C(O)C(Nc2c(N=C)c(N)ncn2)O1	0	775
O=C(O)c1c(N=Nc2ccc(N(C)C)cc2)cccc1	0	776
S(P(=O)(OCC)OCC)CCN(CC)CC	0	777
O=C(OCC(COC(=O)N)(CCC)C)NCCCC	0	778
Ic1cc(CNC(=N)N)ccc1	0	779
OC(C(N(C/C=C/c1ccccc1)C)C)c1ccccc1	0	780
FCC=1N(c2c(C)cccc2)C(=O)c2c(N=1)ccc(N)c2	0	781
O=[N+](OCCN(CCO[N+](=O)[O-])CCO[N+](=O)[O-])[O-]	0	782
O=C(O)CCCCCCCCCCCCCCCCC	0	783
O=C(O)C(C(CC)c1cc2c(cc(OC)cc2)cc1)(C)C	0	784
O=C1C=C2C(C3C(C4C(C)([C@@](O)(C)CC4)CC3)CC2)CC1	0	785
O=C(OCCN(CC)CC)C1(c2ccccc2)CCCC1	0	786
O(CCCC)c1ccc(OCCCN2CCOCC2)cc1	0	787
O=C(O)CN(CC(=O)O)CC(=O)Nc1c(C)cccc1C	0	788
O=C(OCCN(CC)CC)c1c(OCCC)cc(N)cc1	0	789
O=C(Nc1sc2c(n1)ccc(OC)c2)Nc1ccccc1	0	790
S(=O)(=O)(O)C1N(C)c2c(cc(N=NC(=O)N)c(O)c2)C1	0	791
OC1(C#C)C2(C)C(C3C(C4C(=CC(O)CC4)CC3)CC2)CC1	0	792
N=C1C(C)=C/C(=C(/c2ccc(N)cc2)\c2ccc(N)cc2)/C=C1	0	793
OCc1cc2c(/C=N/N/C(=N/CCCCC)/N)c[nH]c2cc1	0	794
O=C(O)CCC(=O)c1cc2-c3c4c(ccc3)cccc4-c2cc1	0	795
OC1(C)C2(C)C(C3C(C4(C)C(=CC3)CC(O)CC4)CC2)CC1	0	796
Ic1c(C(=O)NCC(=O)O)cccc1	0	797
O=C(OCCCN(CCCC)CCCC)c1ccc(N)cc1	0	798
O=C(O)CN(CC(=O)O)CC(=O)Nc1ccc(C(C)C)cc1	0	799
O=C(O)C1C(O)C(O)C(O)C(OC(C#N)c2ccccc2)O1	0	800
ClC(Cl)(Cl)C1OC2C(O)C(C(O)CO)OC2O1	0	801
O=C(OCCN(CC)CC)C(c1ccccc1)c1ccccc1	0	802
Clc1ccc(C/C(=C\CN2CCCC2)/c2ccccc2)cc1	0	803
O=C1C=C2C(C)(C3C(C4C(C)(C(O)(C#C)CC4)CC3)CC2)CC1	0	804
Clc1n(C(C)C)nc(OP(=S)(OCC)OCC)n1	0	805
N=C1C(C)=C/C(=C(/c2cc(C)c(N)cc2)\c2ccc(N)cc2)/C=C1	0	806
O=[N+](OCC(CO[N+](=O)[O-])(CO[N+](=O)[O-])CO[N+](=O)[O-])[O-]	0	807
Br/C=C/C=C(\C=C)/C(CCN(C)C)c1ncccc1	0	808
O=C(O)CCCCCNC(=O)c1cc(OC)c(OC)c(OC)c1	0	809
O=C(OCCN)CCCCCCC/C=C/CCCCCCCC	0	810
O=C(OCCN(CC)CC)C(O)(c1ccccc1)c1ccccc1	0	811
S(C(=O)C(c1ccccc1)c1ccccc1)CCN(CC)CC	0	812
O=C(OC/C=C(/C=C/C=C(/C=C/C=1C(C)(C)CCCC=1C)\C)\C)C	0	813
O=C(OCCOCCN(CC)CC)C1(c2ccccc2)CCCC1	0	814
O=C(N(CCC)CCC)C(NC(=O)c1ccccc1)CCC(=O)O	0	815
O=C1N2c3c(cccc3)C34C2C2C(OCC=C5C2CC3N(C5)CC4)C1	0	816
FC(F)(F)c1cc([N+](=O)[O-])c(N(CCC)CCC)c([N+](=O)[O-])c1	0	817
O=C(CC1N(C)C(CC(O)c2ccccc2)CCC1)c1ccccc1	0	818
O(C)C1C(OC2C(O)C(O)C(O)C(OC)O2)C(O)C(O)C(O)O1	0	819
O=C(C)C1(O)C2(C)C(C3C(C4(C)C(=CC(=O)C=C4)CC3)C(O)C2)CC1	0	820
Clc1c(S(=O)(=O)N)cc(C(=O)NN2C(C)CCCC2C)cc1	0	821
ClC(Cl)(Cl)SN1C(=O)C(C(CCCC)CC)NC1=O	0	822
O=C(OCC1C2(OC)N(C=3C(O)=C(C)C(=N)C(=O)C1=3)CC1N(C)C21)N	0	823
O=C(O)CN(CC(=O)O)CC(=O)Nc1c(C(C)C)cccc1C(C)C	0	824
O=C(Nc1ccc(CCC2N(C)CCCC2)cc1)c1ccc(OC)cc1	0	825
S(=O)(=O)(Nc1sccn1)c1ccc(NC(=O)CCC(=O)O)cc1	0	826
O=C1N(C)C(=O)c2n(CCNC(C(O)c3ccccc3)C)cnc2N1C	0	827
O=C(OCC(O)CO)CCCCCCCCCCCCCCCCC	0	828
O=C(OCCCN1C(C)CCCC1)c1ccc(OC2CCCCC2)cc1	0	829
O=C(N(C(Cc1ccccc1)C)C)CN1C(=O)C=CC(c2ccccc2)=N1	0	830
O=C(NC1C(=O)N2C(C(=O)O)C(C)(C)SC12)C(Oc1ccccc1)C	0	831
O(CC)c1c(OC)cc(Cc2nc(C)cc3c2cc(OC)c(OC)c3)cc1	0	832
Clc1ccc(N(C(=O)Cc2ccccc2)C2CCN(C(C)C)CC2)cc1	0	833
O=C(OCC(=O)C1C2(C)C(C3C(C4(C)C(=CC(=O)CC4)CC3)CC2)CC1)C	0	834
FC12C3(C)C(=CC(=O)C=C3)CCC1C1C(C)(C(CC(=O)CO)C(C)C1)CC2O	0	835
Ic1c(O)c2ncccc2c(I)c1	0	836
O=C(OC(COC(=O)Nc1ccccc1)CN1CCCCC1)Nc1ccccc1	0	837
ClC(Cl)C(=O)N(CCO)Cc1ccc(Oc2ccc([N+](=O)[O-])cc2)cc1	0	838
O=C(Oc1ccc(C2(c3ccc(OC(=O)C)cc3)C(=O)Nc3c2cccc3)cc1)C	0	839
IC=1C(=O)C(I)=CN(CC(=O)O)C=1	0	840
S(=O)(=O)(O)c1cc2c(c(N=Nc3ccc(S(=O)(=O)O)cc3)c(O)cc2)cc1	0	841
O=C(CCC)c1cc2N(CCCN3CCN(C)CC3)c3c(Sc2cc1)cccc3	0	842
O=C(OCC(O)C1C(O)C(O)CO1)CCCCCCC/C=C/CCCCCCC	0	843
Clc1ccc(C(Oc2ccc(C(F)(F)F)cc2)C(=O)OCCNC(=O)C)cc1	0	844
C(CC)(CC)(CC)N1CCN(CCCN2c3c(Sc4c2cccc4)cccc3)CC1	0	845
O=C(CC)c1cc2N(CCCN3CCN(CCO)CC3)c3c(Sc2cc1)cccc3	0	846
P(=O)(Oc1ccc(/C(=C(\CC)/c2ccc(OP(=O)(O)O)cc2)/CC)cc1)(O)O	0	847
O=C(OCC(O)C(O)C(O)C(O)C(=O)O)C(N(C(C)C)C(C)C)N(C(C)C)C(C)C	0	848
Clc1c(C(F)(F)F)cc(C2(O)CCN(CCCC(=O)c3ccc(F)cc3)CC2)cc1	0	849
O(C1C(O)C(OC2C(O)C(NC)C(O)(C)CO2)C(N)CC1N)C1C(N)CC=C(CN)O1	0	850
Clc1c2C(O)C3C(C(=O)C4(O)C(O)=C(C(=O)O)C(=O)C(N(C)C)C4C3)=C(O)c2c(O)cc1	0	851
O([C@@H](COCc1ccccc1)[C@@H]1[C@H](OCc2ccccc2)[C@@H](O)C(OCC)O1)Cc1ccccc1	0	852
ClC12C3(C)C(C(F)CC1C1C(C)(C(C(=O)COC(=O)C(C)(C)C)C(C)C1)CC2O)=CC(=C)C=C3	0	853
O(C1C(O)C(O)C(O)OC1CO)C1C(O)C(O)C(OC2C(O)C(O)C(O)C(CO)O2)C(CO)O1	0	854
O=C1OC=C(C2C3(C)C(O)(C4C(C5(C)C(=CC(OC6C(O)C(O)C(O)C(C)O6)CC5)CC4)CC3)CC2)C=C1	0	855
O=C(Oc1c(C)c(C)c2OC(CCCC(CCCC(CCCC(C)C)C)C)(C)CCc2c1C)CCC(=O)O	0	856
S(=O)(=O)(O)c1c(O)c(N=Nc2c3c(c(S(=O)(=O)O)cc2)cccc3)c2c(c1)cc(S(=O)(=O)O)cc2	0	857
FC(F)(F)c1c(NC(=O)C2C3(C)C(C4(C)C(C5(C)C=CC(=O)NC5CC4)CC3)CC2)cc(C(F)(F)F)cc1	0	858
O=C(CO)C1(O)CC(OC2OC(C)C(O)C(O)C2)c2c(O)c3C(=O)c4c(OC)cccc4C(=O)c3c(O)c2C1	0	859
O=C1C(C)=C(/C=C/C(=C/C=C/C(=C/C=C/C=C(/C=C/C=C(/C=C/C2=C(C)C(=O)CCC2(C)C)\C)\C)/C)/C)C(C)(C)CC1	0	860
O=C(OCC1(O)C(OC(=O)c2cnccc2)C(OC(=O)c2cnccc2)C(COC(=O)c2cnccc2)O1)c1cnccc1	0	861
[SH0](=O)(CCCC(F)(F)C(F)(F)F)CCCCCCCCC[C@H]1[C@H]2[C@H]3[C@](C)([C@@H](O)CC3)CC[C@@H]2c2c(cc(O)cc2)C1	0	862
O=C(OC1C(O)C(OC(=O)c2cc(O)c(O)c(O)c2)OC(OC(=O)c2cc(O)c(O)c(O)c2)C1O)c1cc(O)c(O)c(O)c1	0	863
O=C(N/N=C(\C)/C1(O)CC(OC2OC(C)C(O)C(N)C2)c2c(O)c3C(=O)c4c(OC)cccc4C(=O)c3c(O)c2C1)c1ccccc1	0	864
O=C(OCC)Oc1c(OC)cc(C(=O)OC2C(OC)C(C(=O)OC)C3C(C2)CN2C(c4[nH]c5c(c4CC2)ccc(OC)c5)C3)cc1OC	0	865
O=C(N/C=C/1\C(=O)NC(C(=O)NCC(NC(=O)CC(N)CCCN)C(=O)NC(CO)C(=O)NC(CO)C(=O)N\1)C1NC(N)=NC(O)C1)N	0	866
O(C)[C@@H]1[C@@H](O)[C@H](C)O[C@@H](O[C@H]2[C@H](C)[C@@H](O[C@H]3[C@H](O)[C@@H](N(C)C)C[C@@H](C)O3)[C@@H](C)C[C@]3(C(=O)[C@H](C)[C@@H](O)[C@@H](C)[C@@H](C)OC(=O)[C@@H]2C)OC3)C1	0	867
O=C(O)CCc1c(C)[cH0]=2[nH][cH0]1=CC=1C(CCC(=O)O)=C(C)C(N=1)=CC=1C3(C)C(C(=O)OC)C(C(=O)OC)=CC=C3C(N=1)=Cc1c(C)c(C=C)c([nH]1)C=2	0	868
O=C1N(Cc2c(C)[nH]cn2)CCc2n(C)c3c(c12)cccc3	0	869
O(C)c1ccc(C2C(=O)c3c(C2=O)cccc3)cc1	0	870
O[C@@H](CNCCCCc1ccc(O)cc1)c1cc(O)c(O)cc1	0	871
O([C@H](OC(=O)[C@H]1C(C)(C)S[C@@H]2[C@H](NC(=O)[C@H](N)c3ccccc3)C(=O)N12)C)C(=O)OCC	0	872
O=C(N[C@H]1C(=O)N[C@@H](CCCN)C(=O)NC([C@@H](CC)C)C(=O)N[C@@H](Cc2ccccc2)C(=O)N[C@H](Cc2[nH]cnc2)C(=O)N[C@H](CC(=O)O)C(=O)N[C@H](CC(=O)N)C(=O)NCCCC1)[C@@H](NC(=O)[C@H](NC(=O)[C@@H](NC(=O)[C@@H]1N=C([C@@H](N)[C@@H](CC)C)SC1)CC(C)C)CCC(=O)O)[C@@H](CC)C	0	873
O=C(O)CCNC(=O)c1ccc(N/N=C\2/C=C(C(=O)O)C(=O)C=C/2)cc1	0	874
O=C(Nc1ccc(C(=O)O)cc1)[C@@H](NC(=O)c1ccccc1)Cc1ccc(O)cc1	0	875
N([C@@H](Cc1ccccc1)C)(Cc1ccccc1)C	0	876
Clc1c(S(=O)(=O)N)cc2S(=O)(=O)N=C(CSCc3ccccc3)Nc2c1	0	877
O=C(O)[C@@H](NC(=O)[C@@H](NC(=O)[C@@H](NC(=O)[C@@H](NC(=O)[C@H]1N(C(=O)[C@@H](NC(=O)[C@@H](NC(=O)[C@@H](NC(=O)[C@@H](NC(=O)[C@@H](NC(=O)CNC(=O)[C@@H](NC(=O)CNC(=O)CNC(=O)CNC(=O)CNC(=O)[C@H]2N(C(=O)[C@@H](NC(=O)[C@H]3N(C(=O)[C@H](N)Cc4ccccc4)CCC3)CCCNC(=N)N)CCC2)CC(=O)N)CC(=O)O)Cc2ccccc2)CCC(=O)O)CCC(=O)O)[C@H](CC)C)CCC1)CCC(=O)O)CCC(=O)O)Cc1ccc(O)cc1)CC(C)C	0	878
Clc1ccc([C@H](N2CCN(Cc3ccc(C(C)(C)C)cc3)CC2)c2ccccc2)cc1	0	879
O=C1N(C)C(=O)c2n(C)cnc2N1C	0	880
OC(CCC[C@@H](C)[C@@H]1[C@]2(C)[C@H](/C(=C/C=C/3\C(=C)CC[C@H](O)C\3)/CCC2)CC1)(C)C	0	881
O[C@H](/C=C/[C@@H](C)C1[C@]2(C)[C@H](/C(=C/C=C/3\C(=C)[C@@H](O)C[C@H](O)C\3)/CCC2)CC1)C1CC1	0	882
OC(CCC[C@@H](C)C1[C@]2(C)[C@H](/C(=C/C=C/3\C(=C)[C@@H](O)C[C@H](O)C\3)/CCC2)CC1)(C)C	0	883
O([C@H](OC(=O)C1=C(COC)CS[C@@H]2[C@H](NC(=O)/C(=N\OC)/c3nc(N)sc3)C(=O)N12)C)C(=O)OC(C)C	0	884
S(=O)(=O)(Oc1ccc(C[C@H](N)C(=O)N[C@@H]([C@H](O)C)C(=O)NCC(=O)N[C@H](C(=O)N[C@@H](C(=O)N[C@H](C(=O)N[C@H](C(=O)N)Cc2ccccc2)CC(=O)O)CCCC)Cc2c3c([nH]c2)cccc3)cc1)O	0	885
Clc1ccc(C(=O)c2ccc(OC(C(=O)NCCS(=O)(=O)O)(C)C)cc2)cc1	0	886
P(=O)(O)(O)CO[C@H](CO)CN1C(=O)N=C(N)C=C1	0	887
Clc1c(Cl)cccc1[C@H]1C(C(=O)OCOC(=O)CCC)=C(C)NC(C)=C1C(=O)OC	0	888
Cl[C@]12[C@@H](O)C[C@]3(C)[C@@H](C(=O)CO)[C@H](C)C[C@H]3[C@@H]1C[C@H](F)C=1[C@]2(C)C=CC(=O)C=1	0	889
O=C(Nc1ccc(C(=O)N2c3c(-c4nc(C)[nH]c4CC2)cccc3)cc1)c1c(-c2ccccc2)cccc1	0	890
S(CC[C@H](NC(=O)[C@@H](NC(=O)[C@@H](NC(=O)[C@@H](N)CO)Cc1ccc(O)cc1)CO)C(=O)N[C@H](C(=O)N[C@H](C(=O)N[C@H](C(=O)N[C@H](C(=O)N[C@H](C(=O)NCC(=O)N[C@H](C(=O)N1[C@H](C(=O)N[C@H](C(=O)NCC(=O)N[C@H](C(=O)N[C@H](C(=O)N[C@H](C(=O)N[C@H](C(=O)N2[C@H](C(=O)N[C@H](C(=O)N[C@H](C(=O)N[C@H](C(=O)N[C@H](C(=O)N3[C@H](C(=O)N[C@H](C(=O)NCC(=O)N[C@H](C(=O)N[C@H](C(=O)N[C@H](C(=O)N[C@H](C(=O)N[C@H](C(=O)N[C@H](C(=O)…	0	891
S(CC[C@H](NC(=O)[C@@H](NC(=O)[C@@H](NC(=O)[C@H](N)CO)Cc1ccc(O)cc1)CO)C(=O)N[C@H](C(=O)N[C@H](C(=O)N[C@H](C(=O)N[C@H](C(=O)N[C@H](C(=O)NCC(=O)N[C@H](C(=O)N1[C@H](C(=O)N[C@H](C(=O)NCC(=O)N[C@@H](C(=O)N[C@@H](C(=O)N[C@@H](C(=O)N[C@@H](C(=O)N2[C@H](C(=O)N[C@H](C(=O)N[C@H](C(=O)N[C@H](C(=O)N[C@H](C(=O)N3[C@H](C(=O)O)CCC3)Cc3ccc(O)cc3)C(C)C)CCCCN)C(C)C)CCC2)CCCNC(=N)N)CCCNC(=N)N)CCCCN)CCCCN)C(C)C)CCC1)…	0	892
O=C(O)C=1Oc2c(c(OCC(O)COc3c4C(=O)C=C(C(=O)O)Oc4ccc3)ccc2)C(=O)C=1	0	893
P(=O)(O[C@@H](CNC(=O)CC[C@]\1(C)[C@@H](CC(=O)N)C=2[C@]3(C)[C@@](CC(=O)N)(C)[C@H](CCC(=O)N)C(/C(/C)=C\4/[C@@](CC(=O)N)(C)[C@@H](CCC(=O)N)C(=N/4)/C=C\4/C(C)(C)[C@@H](CCC(=O)N)C(/C(/C)=C/1\N=2)=N/4)=N3)C)(O[C@H]1[C@@H](O)[C@@H](n2c3c(nc2)cc(C)c(C)c3)O[C@@H]1CO)O	0	894
O=C(OC)[C@@H]1[C@@H](OC)[C@H](OC(=O)c2cc(OC)c(OC)c(OC)c2)C[C@H]2[C@@H]1C[C@H]1N(C2)CCc2c3c([nH]c12)cccc3	0	895
O([C@@H]1[C@@H](C)O[C@@H](O[C@@H]2[C@@H](C)O[C@@H](O[C@@H]3[C@@H](C)O[C@@H](O[C@@H]4C[C@@H]5[C@@](C)([C@@H]6[C@H]([C@]7(O)[C@](C)([C@H](O)C6)[C@@H](C6=CC(=O)OC6)CC7)CC5)CC4)C[C@@H]3O)C[C@@H]2O)C[C@@H]1O)[C@H]1[C@H](O)[C@@H](O)[C@H](O)[C@@H](CO)O1	0	896
OC[C@@H]1[C@@H](O)[C@H](O)[C@H](O)[C@H](O)O1	0	897
O(C)c1c(OC)cc2c(C(=O)[C@@H](CC3CCN(Cc4ccccc4)CC3)C2)c1	0	898
NC=1N2[C@@H](c3c(cccc3)Cc3c2cccc3)CN=1	0	899
O=C(O)C[C@H]1C(=O)N[C@@H](Cc2c3c([nH]c2)cccc3)C(=O)N2[C@H](C(=O)N[C@H](C(=O)N)CSSCCC(=O)N[C@@H](CCCC/N=C(\N)/N)C(=O)NCC(=O)N1)CCC2	0	900
O=C(N[C@@]1(C(C)C)C(=O)N2[C@@H](C(CC)(C)C)C(=O)N3[C@@H]([C@@]2(O)O1)CCC3)[C@@H]1CN(C)[C@@H]2[C@H](c3c4c([nH]cc4C2)ccc3)C1	0	901
P(=O)(O)(O)C(P(=O)(O)O)(O)C	0	902
O=C(OCC)c1n([C@H](C)c2ccccc2)cnc1	0	903
O=C1C(O)=C2[C@@](C)([C@@H]3[C@H]([C@H]4[C@@](C)(C(=O)CC4)CC3)CC2)CC1	0	904
O=CNc1c(O)ccc([C@@H](O)CN[C@@H](Cc2ccc(OC)cc2)C)c1	0	905
O=C(N)c1cc2c([nH]c3c2C[C@H](NC)CC3)cc1	0	906
[SH0](=O)(CCCC(F)(F)C(F)(F)F)CCCCCCCCC[C@H]1[C@H]2[C@H]3[C@@](C)([C@@H](O)CC3)CC[C@@H]2c2c(cc(O)cc2)C1	0	907
O=C(O)CN(CC(=O)NC)CCN(CC(=O)O)CCN(CC(=O)O)CC(=O)NC	0	908
O=C(O)CN1CCN(C[C@H](O)C)CCN(CC(=O)O)CCN(CC(=O)O)CC1	0	909
O=C(O)CN(CC(=O)NCCOC)CCN(CC(=O)O)CCN(CC(=O)O)CC(=O)NCCOC	0	910
Clc1ccc(C[C@H](NC(=O)[C@H](NC(=O)C)Cc2cc3c(cc2)cccc3)C(=O)N[C@H](C(=O)N[C@@H](C(=O)N[C@@H](C(=O)N[C@@H](C(=O)N[C@H](C(=O)N[C@H](C(=O)N2[C@H](C(=O)N[C@@H](C(=O)N)C)CCC2)CCCC/N=C(\NCC)/NCC)CC(C)C)CCCC/N=C(\NCC)/NCC)Cc2ccc(O)cc2)CO)Cc2cnccc2)cc1	0	911
O([C@H]1[C@H](O)[C@@H](O[C@@H]2[C@H](O)[C@@H](NC)[C@](O)(C)CO2)[C@H](N)C[C@@H]1N)[C@@H]1[C@H](N)CC[C@@H](CN)O1	0	912
S(CC[C@H](NC(=O)[C@@H](NC(=O)[C@@H](NC(=O)[C@@H](NC(=O)[C@@H](NC(=O)[C@@H](NC(=O)[C@@H](NC(=O)[C@@H](NC(=O)[C@@H](NC(=O)[C@@H](NC(=O)[C@@H](NC(=O)[C@@H](NC(=O)[C@@H](NC(=O)[C@@H](NC(=O)[C@@H](NC(=O)[C@@H](NC(=O)[C@@H](NC(=O)[C@@H](NC(=O)[C@@H](NC(=O)[C@@H](NC(=O)[C@@H](NC(=O)[C@@H](NC(=O)[C@@H](NC(=O)CNC(=O)[C@@H](NC(=O)[C@@H](NC(=O)[C@@H](N)Cc1[nH]cnc1)CO)CCC(=O)N)[C@H](O)C)Cc1ccccc1)[C@H](O)C)C…	0	913
O=C(N[C@@H](C(=O)NCC(=O)N[C@@H](C(=O)N[C@@H](C(=O)N1[C@H](C(=O)NCC(=O)N)CCC1)CCC/N=C(\N)/N)CC(C)C)Cc1ccc(O)cc1)[C@H](NC(=O)[C@@H](NC(=O)[C@@H](NC(=O)[C@H]1NC(=O)CC1)Cc1[nH]cnc1)Cc1c2c([nH]c1)cccc2)CO	0	914
O=C(NNC(=O)[C@H]1N(C(=O)[C@H](NC(=O)[C@H](NC(=O)[C@H](NC(=O)[C@H](NC(=O)[C@H](NC(=O)[C@@H](NC(=O)[C@@H](NC(=O)[C@H]2NC(=O)CC2)Cc2[nH]cnc2)Cc2c3c([nH]c2)cccc3)CO)Cc2ccc(O)cc2)COC(C)(C)C)CC(C)C)CCC/N=C(\N)/N)CCC1)N	0	915
N(=C(\N)/N)\C[C@H]1OC2(OC1)CCCCC2	0	916
ClCC(=O)[C@@]1(OC(=O)CC)[C@@H](C)C[C@H]2[C@@]1(C)C[C@@H](O)[C@]1(F)[C@]3(C)C([C@@H](F)C[C@@H]21)=CC(=O)C=C3	0	917
NCCc1[nH]cnc1	0	918
N(Cc1occc1)c1ncnc2nc[nH]c12	0	919
Ic1c([C@H](CCCCCCCCC(=O)OCC)C)cccc1	0	920
Ic1c(N(C(=O)CC(=O)N(C)c2c(I)c(C(=O)N[C@@H]([C@H](O)CO)CO)c(I)c(C(=O)N[C@@H]([C@H](O)CO)CO)c2I)C)c(I)c(C(=O)N[C@@H]([C@H](O)CO)CO)c(I)c1C(=O)N[C@@H]([C@H](O)CO)CO	0	921
O=C(NCc1ccccc1)[C@H](NC(=O)C)COC	0	922
O([C@H]1[C@H](O)[C@@](O)(CO)O[C@@H]1CO)[C@H]1[C@H](O)[C@@H](O)[C@@H](O)[C@@H](CO)O1	0	923
O=C(N[C@H](Cc1ccccc1)C)[C@@H](N)CCCCN	0	924
FC(F)(CCCC)[C@]1(O)O[C@H]2[C@@H]([C@@H](CCCCCCC(=O)O)C(=O)C2)CC1	0	925
Clc1ccc([C@]2(O)N3C(=NCC3)c3c2cccc3)cc1	0	926
ClCCC(N)CCCl	0	927
O=C(OCC(COC(=O)N)(CCC)C)N	0	928
[SH0](=O)(C)c1cc2N(CC[C@H]3N(C)CCCC3)c3c(Sc2cc1)cccc3	0	929
O=C(O[C@H]1[C@H](C)O[C@@H](O[C@H]2[C@H](N(C)C)[C@@H](O)[C@H](O[C@H]3[C@@H](CC=O)C[C@@H](C)[C@@H](OC(=O)C)/C=C/C=C/C[C@@H](C)OC(=O)C[C@@H](OC(=O)CC)C3OC)O[C@@H]2C)C[C@]1(OC(=O)C)C)CC	0	930
O=C(N[C@@H](C(=O)N[C@@H](C(=O)N[C@@H](C(=O)N[C@@H](C(=O)N1[C@H](C(=O)NCC(=O)N)CCC1)CCC/N=C(\N)/N)CC(C)C)Cc1cc2c(cc1)cccc2)Cc1ccc(O)cc1)[C@H](NC(=O)[C@@H](NC(=O)[C@@H](NC(=O)[C@H]1NC(=O)CC1)Cc1[nH]cnc1)Cc1c2c([nH]c1)cccc2)CO	0	931
O=[N+]([O-])c1cc([C@H]2C(C(=O)OCCN(Cc3ccccc3)C)=C(C)NC(C)=C2C(=O)OC)ccc1	0	932
Clc1c(NC(=O)c2c(O)ccc(Cl)c2)ccc([N+](=O)[O-])c1	0	933
FC(F)(F)c1cc([N+](=O)[O-])c(C(=O)C2C(=O)CCCC2=O)cc1	0	934
O(CCO)c1ccc(CCCCCCCCC)cc1	0	935
O=C(OCC=1N(C)CCCN=1)[C@@](O)(c1ccccc1)C1CCCCC1	0	936
P(=O)(O)(O)C(P(=O)(O)O)(O)CCN	0	937
P(=O)(OCCCCCNC(=O)[C@@H](NC(=O)OCCOC)CCCCNC(=O)OCCOC)(O)C	0	938
O=C1C([C@@H](CCC)C)(CC)C(=O)NC(=O)N1	0	939
S(C[C@H]1CN(CCC)[C@H]2[C@@H](c3c4c([nH]cc4C2)ccc3)C1)C	0	940
O=C1C([C@H](CC)c2ccccc2)=C(O)Oc2c1cccc2	0	941
Cl[C@@H]1[C@H](OC)C[C@H](/C=C(\C)/[C@@H]2[C@H](C)[C@@H](O)CC(=O)[C@@H](CC)/C=C(/C)\C[C@H](C)C[C@H](OC)[C@@H]3[C@@H](OC)C[C@@H](C)[C@](O)(C(=O)C(=O)N4[C@H](C(=O)O2)CCCC4)O3)CC1	0	942
SC[C@H](NC(=O)[C@@H](N)CCCCN)C(=O)N[C@H](C(=O)N[C@@H]([C@H](O)C)C(=O)N[C@H](C(=O)N[C@@H]([C@H](O)C)C(=O)N[C@H](C(=O)N[C@H](C(=O)N[C@@H]([C@H](O)C)C(=O)N[C@H](C(=O)N[C@H](C(=O)N[C@H](C(=O)N[C@H](C(=O)N[C@H](C(=O)N[C@H](C(=O)N[C@H](C(=O)N[C@H](C(=O)N[C@H](C(=O)N[C@H](C(=O)N[C@H](C(=O)N[C@H](C(=O)N[C@H](C(=O)N[C@H](C(=O)NCC(=O)N1[C@H](C(=O)N[C@@H]([C@H](CC)C)C(=O)N[C@H](C(=O)N2[C@H](C(=O)N3[C@H](C(=…	0	943
Clc1cc2C(c3ccccc3)=NCC(=O)N(CC3CC3)c2cc1	0	944
O=C(Nc1c(C)cccc1C)CN1CCN(C[C@H](O)COc2c(OC)cccc2)CC1	0	945
O=C(NC)c1cn(-c2nc(N)c3ncn([C@H]4[C@H](O)[C@H](O)[C@@H](CO)O4)c3n2)nc1	0	946
O=C(OC)CCN1CCC(N(C(=O)CC)c2ccccc2)(C(=O)OC)CC1	0	947
S(CC(=O)O[C@H]1[C@@]2(C)[C@H](C)CC[C@]3([C@@H](C)[C@H](O)[C@@](C=C)(C)C1)[C@H]2C(=O)CC3)C1C[C@@H]2N(C)[C@H](C1)CC2	0	948
Fc1c(Cn2nnc(C(=O)N)c2)c(F)ccc1	0	949
C(C)(C)(C)c1cc2O[C@H](C)Oc2cc1	0	950
P(=O)(O)(O)CN(CP(=O)(O)O)CCN(CP(=O)(O)O)CP(=O)(O)O	0	951
O=C(O)[C@@H](NC(=O)[C@@H](NC(=O)CNC(=O)[C@@H](NC(=O)[C@@H](NC(=O)[C@@H](NC(=O)[C@@H](NC(=O)[C@H](NC(=O)[C@@H](NC(=O)[C@H](NC(=O)[C@H](NC(=O)[C@H](NC(=O)[C@@H](NC(=O)[C@@H](NC(=O)[C@@H](NC(=O)[C@@H](NC(=O)[C@H](NC(=O)[C@@H](NC(=O)[C@H](NC(=O)[C@H](NC(=O)[C@H](NC(=O)[C@H](NC(=O)[C@H](NC(=O)CNC(=O)[C@H](NC(=O)[C@H](NC(=O)[C@H](N)Cc1[nH]ccn1)CO)CC(=O)O)[C@H](O)C)Cc1ccccc1)[C@H](O)C)CO)CCC(=O)O)CC(C)C…	0	952
N([C@@H](Cc1ccccc1)C)(CC#C)C	0	953
S(CC[C@H](NC(=O)[C@@H](NC(=O)[C@H](NC(=O)[C@@H](NC(=O)[C@@H](NC(=O)[C@@H](NC(=O)[C@@H](NC(=O)[C@H](NC(=O)[C@H](NC(=O)[C@H](NC(=O)[C@@H](NC(=O)[C@H](NC(=O)CNC(=O)[C@@H](NC(=O)[C@@H](NC(=O)[C@@H](NC(=O)[C@@H](NC(=O)[C@H](NC(=O)[C@H](NC(=O)[C@H](NC(=O)[C@@H](NC(=O)[C@@H](NC(=O)[C@@H](NC(=O)[C@H](NC(=O)[C@H](NC(=O)[C@H](NC(=O)[C@H](N)Cc1ccc(O)cc1)C)CC(=O)O)C)[C@@H](CC)C)Cc1ccccc1)[C@H](O)C)CC(=O)N)CO…	0	954
S(=O)(O)(=Nc1ncccn1)c1ccc(N)cc1	0	955
O=C[C@]1(O)[C@@H](O[C@H]2[C@@H](NC)[C@H](O)[C@@H](O)[C@H](CO)O2)[C@H](O[C@H]2[C@H](O)[C@@H](O)[C@H](/N=C(\N)/N)[C@@H](O)[C@@H]2/N=C(\N)/N)O[C@H]1C	0	956
O=C(O)[C@@H](C(=O)N[C@]1(OC)C(=O)N2[C@@H](C(=O)O)C(C)(C)S[C@H]12)c1cscc1	0	957
S(CC[C@H](NC(=O)[C@@H](NC(=O)[C@@H](NC(=O)[C@@H](NC(=O)[C@@H](NC(=O)[C@@H](NC(=O)CNC(=O)[C@@H](NC(=O)[C@@H](NC(=O)[C@@H](NC(=O)[C@@H](NC(=O)[C@@H](NC(=O)[C@@H](NC(=O)[C@@H](NC(=O)[C@@H](NC(=O)[C@@H](NC(=O)[C@@H](NC(=O)[C@@H](N)CO)C(C)C)CO)CCC(=O)O)[C@H](CC)C)CCC(=O)N)CC(C)C)CCSC)Cc1nc[nH]c1)CC(=O)N)CC(C)C)CCCCN)Cc1nc[nH]c1)CC(C)C)CC(=O)N)CO)C(=O)N[C@H](C(=O)N[C@H](C(=O)N[C@H](C(=O)N[C@H](C(=O)N[C…	0	958
O(C[C@@H](O)CNC(C)(C)C)c1c2SCCCc2ccc1	0	959
O=C([C@H](NC(=O)[C@H]1NC(=O)CC1)Cc1[nH]cnc1)N1[C@H](C(=O)N)CCC1	0	960
O=C1CC2=C([C@@H]3C([C@H](C)C2)[C@H]2[C@@](C)([C@](O)(C#C)CC2)CC3)CC1	0	961
O=C(O)[C@@H](C(=O)N[C@@H]1C(=O)N2[C@@H](C(=O)O)C(C)(C)S[C@H]12)c1cscc1	0	962
O(C[C@@H](O)CNC(C)(C)C)c1c(N2CCOCC2)nsn1	0	963
N(CCNCCN)CCN	0	964
O[C@@H]1[C@]2(C)[C@@H]([C@@H]3[C@H]([C@@]4(C)[C@]5(O[C@H]5C(O)=C(C#N)C4)CC3)CC2)CC1	0	965
O=C1Oc2c(C)c3oc(C)cc3cc2C(C)=C1	0	966
O=C(N[C@@H](C(=O)N[C@@H](C(=O)N[C@@H](C(=O)N[C@@H](C(=O)N1[C@H](C(=O)NCC(=O)N)CCC1)CCC/N=C(\N)/N)CC(C)C)Cc1c2c([nH]c1)cccc2)Cc1ccc(O)cc1)[C@H](NC(=O)[C@@H](NC(=O)[C@@H](NC(=O)[C@H]1NC(=O)CC1)Cc1[nH]cnc1)Cc1c2c([nH]c1)cccc2)CO	0	967
S(=O)(=O)(O)c1cc(N)c2C(=O)/C(=N\Nc3c(C)cc(-c4cc(C)c(N/N=C/5\C(=O)c6c(N)cc(S(=O)(=O)O)cc6C=C\5S(=O)(=O)O)cc4)cc3)/C(S(=O)(=O)O)=Cc2c1	0	968
Ic1c(NC(=O)CCC)c(I)cc(I)c1C[C@H](C(=O)O)CC	0	969
n1c2c(ncc1)cc1[C@H]3CNC[C@@H](c1c2)C3	0	970
O[C@@H]1C/C(=C/C=C\2/[C@H]3[C@@](C)([C@@H]([C@@H](CCCC(C)C)C)CC3)CCC/2)/C(=C)CC1	0	971
O=C(NO)CCCCCCC(=O)Nc1ccccc1	0	972
O[C@@H]1[C@@H](O)[C@H](O)CO[C@@H]1O	0	973
Clc1cnc(N2[C@H](OC(=O)N3CCN(C)CC3)c3nccnc3C2=O)cc1	0	974
O=C(O)C(N)CCCC	0	975
O[C@@H]1[C@@H]2Oc3c(O)ccc4c3[C@@]32[C@H]([C@H](N(C)CC3)C4)C=C1	0	976
Oc1cc([C@@H]([C@H](CN(C)C)C)CC)ccc1	0	977
N(C(Cc1ccccc1)C)(Cc1ccccc1)C	0	978
N=1N=NC=CC=NN=1	0	979
O=C(Nc1c(C)cccc1C)CN1CCN(CC(O)COc2c(OC)cccc2)CC1	0	980
O=C(NCC(=O)O)[C@H](CN1C[C@H](C)[C@](C)(c2cc(O)ccc2)CC1)Cc1ccccc1	0	981
FC(F)(CCCC)[C@]1(O)O[C@H]2[C@@H]([C@H](CCCCCCC(=O)O)C(=O)C2)CC1	0	982
O=C1N=C2N(CC(O)C(O)C(O)CO)c3c(N=C2C(=O)N1)cc(C)c(C)c3	0	983
Brc1[nH]c2C(=O)N(C)C(=O)N(C)c2n1	0	984
OC[C@@H]1[C@@H](O)[C@@H](O)[C@H](n2c3ncnc(N)c3nc2)O1	0	985
O=C(NCCCC[C@H]1C(=O)N[C@@H](CCCN)C(=O)NC([C@H](CC)C)C(=O)N[C@@H](Cc2ccccc2)C(=O)N[C@@H](Cc2[nH]cnc2)C(=O)N[C@H](CC(=O)O)C(=O)N[C@@H](CC(=O)N)C(=O)N1)[C@@H](NC(=O)[C@H](NC(=O)[C@@H](NC(=O)C1N=C(C(N)C(CC)C)SC1)CC(C)C)CCC(=O)O)[C@H](CC)C	0	986
Fc1nc(N)c2ncn([C@H]3[C@@H](O)[C@H](O)[C@@H](CO)O3)c2n1	0	987
Clc1cc2c(/C(=C/3\CCN(C(=O)OCC)CC\3)/c3ncccc3CC2)cc1	0	988
O(N)C(=O)CNC(=O)c1ccccc1	0	989
S(=O)(=O)(O)CCCC[N+]1=C(/C=C/C=C/C=C/C=C\2/N(CCCCS(=O)(=O)[O-])c3c(C/2(C)C)c2c(cc3)cccc2)C(C)(C)c2c3c(ccc12)cccc3	0	990
O=C[C@H](O)[C@@H](O)[C@H](O)[C@H](O)CO	0	991
O=C([C@@H](NC(=O)[C@H]1NC(=O)CC1)Cc1[nH]cnc1)N1[C@H](C(=O)N)CCC1	0	992
S(=S)(=O)(O)O	0	993
P(=O)(OC[C@H](N(CC(=O)O)CC(=O)O)CN(CC(=O)O)CCN(CC(=O)O)CC(=O)O)(OC1CCC(c2ccccc2)(c2ccccc2)CC1)O	0	994
O=C(O)CN(CC(=O)O)CCN(CC(=O)O)CCN(CC(=O)O)CC(=O)O	0	995
O=C(O)CCC/C=C/C[C@@H]1[C@H](O)C[C@H](O)C1/C=C\[C@@](O)(CCCCC)C	0	996
O=C(OCCN)CCCCCCC/C=C\CCCCCCCC	0	997
O=C(O)CCC1=C(C)C=2N=C1C=C1C(CCC(=O)O)=C(C)C(=N1)C=[cH0]1c(C)c(C(O)C)[cH0]([nH]1)=Cc1c(C)c(C(OC(C)c3c(C)c\4[nH]c3C=[cH0]3c(C)c(C(O)C)[cH0]([nH]3)=CC=3C(C)=C(CCC(=O)O)/C(/N=3)=C/C=3C(CCC(=O)O)=C(C)/C(/N=3)=C/4)C)c([nH]1)C=2	0	998
S(=O)(=O)(NC(C(=O)N1[C@@H](C(=O)O)C[C@H](C)CC1)CCC/N=C(\N)/N)c1c2NCC(C)Cc2ccc1	0	999
O=C(N[C@H]1[C@H](O[C@@H]2[C@H](O)[C@@H](N)[C@H](O)[C@@H](CO)O2)[C@@H](O)[C@H](O[C@@H]2[C@H](O)[C@@H](O)[C@H](O)[C@@H](CN)O2)[C@@H](N)C1)[C@@H](O)CCN	0	1000
O=C(OCC)c1n(C(C)c2ccccc2)cnc1	0	1001
O/N=C(/[C@H](NCC(CN[C@@H](/C(=N/O)/C)C)(C)C)C)\C	0	1002
O=C(NCC(=O)N)C(NC(=O)C1N(C(=O)C2NC(=O)C(CC(=O)N)NC(=O)C(CCC(=O)N)NC(=O)C(Cc3ccccc3)NC(=O)C(Cc3ccc(O)cc3)NC(=O)C(N)CSSC2)CCC1)CCC/N=C(\N)/N	0	1003
Oc1ccc(CCN)cc1	0	1004
