# Supplementary material for: Prediction of Drug-Induced Liver Injury: From Molecular Physicochemical Properties and Scaffold Architectures to Machine Learning Approaches
Source: Research Square preprint supplement (doi:10.21203/rs.3.rs-4268191/v1), 2024-04-18
Supplement: Supplementary file 2 [file dacf07a9f6ded1c67b8e38e8.xlsx]

## Sheet: DILI_positive_compounds_Total_1
mol	Binary_Characterization	index
Br[C@H](Cl)C(F)(F)F	1	1
Br[C@H](C(=O)NC(=O)N)C(C)C	1	2
Brc1c(Oc2c(C)cc(C#N)cc2C)nc(Nc2ccc(C#N)cc2)nc1N	1	3
Brc1c(O)c(Br)cc(C(=O)c2c(CC)oc3c2cccc3)c1	1	4
Brc1ccc(S(=O)(=O)N/C=N/CCSCc2nc(/N=C(\N)/N)sc2)cc1	1	5
Brc1ccc(C(=O)c2c(N)c(CC(=O)O)ccc2)cc1	1	6
Brc1ccccc1	1	7
Cl[C@@H]([C@@H](NC(=O)[C@@H]1N(C)C[C@@H](CCC)C1)[C@H]1[C@H](O)[C@H](O)[C@H](O)[C@H](SC)O1)C	1	8
ClC(Cl)C(=O)N[C@@H]([C@@H](O)c1ccc([N+](=O)[O-])cc1)CO	1	9
ClC(Cl)C(=O)N[C@@H]([C@@H](O)c1ccc([N+](=O)[O-])cc1)COC(=O)CCCCCCCCCCCCCCC	1	10
ClC(Cl)C(F)(F)OC	1	11
Cl[C@H](F)C(F)(F)OC(F)F	1	12
Cl[C@H](OC(F)F)C(F)(F)F	1	13
ClC1(Cl)[C@@H](c2ccc(OC(C(=O)O)(C)C)cc2)C1	1	14
ClC=1C=2[C@](C)([C@H]3[C@@H](C(=O)C=2)C3)[C@@H]2[C@H]([C@H]3[C@@](C)([C@@](O)(C(=O)C)CC3)CC2)C=1	1	15
ClC=1C=2[C@](C)([C@H]3[C@@H](C(=O)C=2)C3)[C@@H]2[C@H]([C@H]3[C@@](C)([C@@](OC(=O)C)(C(=O)C)CC3)CC2)C=1	1	16
Clc1ccc(-c2c(CC(=O)N(CCC)CCC)n3c(n2)C=CC(Cl)=C3)cc1	1	17
ClCCN(CCCl)C=1C(=O)NC(=O)NC=1	1	18
ClCCN(CCCl)c1ccc(C[C@H](N)C(=O)O)cc1	1	19
ClCCN(CCCl)c1ccc(CCCC(=O)O)cc1	1	20
ClCCN(N=O)C(=O)NC1CCCCC1	1	21
ClCCN(N=O)C(=O)NCCCl	1	22
ClCCN(CCCl)[P@]1(=O)OCCCN1	1	23
ClCCN[P@]1(=O)N(CCCl)CCCO1	1	24
ClCC/C(=C(/c1ccc(OCCN(C)C)cc1)\c1ccccc1)/c1ccccc1	1	25
Cl/C(/Cl)=C\Cl	1	26
Clc1c(Cl)c(C(=O)c2sccc2)ccc1OCC(=O)O	1	27
Clc1c(Cl)c2C(=O)[C@](C)(c3ccccc3)Cc2cc1OCC(=O)O	1	28
Clc1c(Cl)cccc1-c1c(N)nc(N)nn1	1	29
Clc1c(NS(=O)(=O)c2c(C(=O)Cc3c(C)cc4OCOc4c3)scc2)onc1C	1	30
Clc1c(OC)cc(OC)c2C(=O)[C@@]3([C@H](C)CC(=O)C=C3OC)Oc12	1	31
Clc1c2Oc3c(O[C@H]4[C@@H](O[C@H]5O[C@@H](C)[C@@H](O)[C@](N)(C)C5)[C@@H](O)[C@@H](O)[C@@H](CO)O4)c4Oc5c(Cl)cc([C@@H](O)[C@H]6C(=O)N[C@@H](C(=O)O)c7c(c(O)cc(O)c7)-c7c(O)ccc([C@H](C(=O)N6)NC(=O)[C@H](NC(=O)[C@H](CC(=O)N)NC(=O)[C@@H](NC(=O)[C@H](NC)CC(C)C)[C@H](O)c(c1)cc2)c(c3)c4)c7)cc5	1	32
Clc1c2[C@@H](O)[C@H]3C(C(=O)c2c(O)cc1)=C(O)[C@]1(O)C(=O)C(C(=O)N)=C(O)[C@@H](N(C)C)[C@H]1C3	1	33
Clc1c(N)cc(OC)c(C(=O)NCCN(CC)CC)c1	1	34
Clc1cc(C(=O)NCCc2ccc(S(=O)(=O)NC(=O)NC3CCCCC3)cc2)c(OC)cc1	1	35
Clc1c(O)c(Sc2c(O)c(Cl)cc(Cl)c2)cc(Cl)c1	1	36
Clc1c([C@]2(Cn3cncc3)O[C@@H](COc3ccc(N4CCN(C(=O)C)CC4)cc3)CO2)ccc(Cl)c1	1	37
Clc1c([C@]2(Cn3ncnc3)O[C@H](COc3ccc(N4CCN(c5ccc(N6C(=O)N([C@H](CC)C)N=C6)cc5)CC4)cc3)CO2)ccc(Cl)c1	1	38
Clc1cc(N2CCN(CCCN3C(=O)N(CCOc4ccccc4)C(CC)=N3)CC2)ccc1	1	39
Clc1cc(N2CCN(CCCN3C(=O)N4C(=N3)C=CC=C4)CC2)ccc1	1	40
Clc1c(S(=O)(=O)N)cc(C(=O)O)c(NCc2occc2)c1	1	41
Clc1c(F)ccc(Nc2ncnc3c2cc(OCCCN2CCOCC2)c(OC)c3)c1	1	42
Clc1c(OCc2cc(F)ccc2)ccc(Nc2ncnc3c2cc(-c2oc(CNCCS(=O)(=O)C)cc2)cc3)c1	1	43
Clc1cc(C(=O)[C@@H](NC(C)(C)C)C)ccc1	1	44
Clc1c(Cl)ccc([C@@H]2c3c([C@@H](NC)CC2)cccc3)c1	1	45
Clc1c(N2CC=CC2)ccc([C@H](C(=O)O)C)c1	1	46
Clc1c(OCC=C)ccc(CC(=O)O)c1	1	47
Clc1cc2N(c3ccccc3)C(=O)CC(=O)N(C)c2cc1	1	48
Clc1cc2N(CCCN(C)C)c3c(cccc3)CCc2cc1	1	49
Clc1cc2N(CCCN(C)C)c3c(Sc2cc1)cccc3	1	50
Clc1cc2N(CCCN3CCC(C(=O)N)CC3)c3c(Sc2cc1)cccc3	1	51
Clc1cc2N(CCCN3CCN(C)CC3)c3c(Sc2cc1)cccc3	1	52
Clc1cc2N=C(N3CCN(C)CC3)c3c(Nc2cc1)cccc3	1	53
Clc1c(S(=O)(=O)N)cc2C(=O)N([C@H](C)Nc2c1)c1c(C)cccc1	1	54
Clc1cc2NC(=O)Oc2cc1	1	55
Clc1c(S(=O)(=O)N)cc2S(=O)(=O)NCNc2c1	1	56
Clc1cc2S(=O)(=O)N(C)c3c([C@@H](NCCCCCCC(=O)O)c2cc1)cccc3	1	57
Clc1cc2[C@](C(F)(F)F)(C#CC3CC3)OC(=O)Nc2cc1	1	58
Clc1cc2C(N3CCN(C)CC3)=Nc3c(Oc2cc1)cccc3	1	59
Clc1cc2c(/C(=C/3\CCNCC\3)/c3ncccc3CC2)cc1	1	60
Clc1cc2nc(/C=C/c3cc([C@@H](SCC4(CC(=O)O)CC4)CCc4c(C(O)(C)C)cccc4)ccc3)ccc2cc1	1	61
Clc1cc2nc3c(c(N[C@H](CCCN(CC)CC)C)c2cc1)cc(OC)cc3	1	62
Clc1cc2nccc(N[C@@H](CCCN(CC)CC)C)c2cc1	1	63
Clc1cc2nccc(Nc3cc(CN(CC)CC)c(O)cc3)c2cc1	1	64
Clc1cc2nccc(Nc3c(C(=O)OC[C@H](O)CO)cccc3)c2cc1	1	65
Clc1ccc(NC=2/C(=N/C(C)C)/C=C3N(c4ccc(Cl)cc4)c4c(N=C3C=2)cccc4)cc1	1	66
Clc1c(C(F)(F)F)cc(NC(=O)Nc2ccc(Oc3cc(C(=O)NC)ncc3)cc2)cc1	1	67
Clc1ccc(NC(NC(=N)NC(C)C)=N)cc1	1	68
Clc1ccc(OC(C(=O)OCC)(C)C)cc1	1	69
Clc1ccc(OCC(=O)N2CCN(Cc3cc4OCOc4cc3)CC2)cc1	1	70
Clc1ccc(S(=O)(=O)NC(=O)NCCC)cc1	1	71
Clc1ccc(-c2c(N)nc(N)nc2CC)cc1	1	72
Clc1ccc(-c2oc3c(n2)cc([C@H](C(=O)O)C)cc3)cc1	1	73
Clc1ccc(-c2scc(CC(=O)O)n2)cc1	1	74
Clc1ccc(C(=O)NCCc2ccc(OC(C(=O)O)(C)C)cc2)cc1	1	75
Clc1ccc(C(=O)c2c(C)n(CC(=O)O)c3c2ccc(OC)c3)cc1	1	76
Clc1ccc(C(=O)c2ccc(OC(C(=O)OC(C)C)(C)C)cc2)cc1	1	77
Clc1ccc(C(=O)n2c(C)c(CC(=O)O)c3c2ccc(OC)c3)cc1	1	78
Clc1ccc([C@H](CCN(C)C)c2ncccc2)cc1	1	79
Clc1ccc([C@@H](N2CCN(CCOCC(=O)O)CC2)c2ccccc2)cc1	1	80
Clc1ccc(C2([C@H](N(C)C)CC(C)C)CCC2)cc1	1	81
Clc1ccc([C@H]2S(=O)(=O)CCC(=O)N2C)cc1	1	82
Clc1c(S(=O)(=O)N)cc(C(=O)NN2[C@@H](C)Cc3c2cccc3)cc1	1	83
Clc1c(S(=O)(=O)N)cc([C@]2(O)NC(=O)c3c2cccc3)cc1	1	84
Clc1c(NC2=NCCN2)c2nsnc2cc1	1	85
Clc1c(NC(=O)c2sc(Nc3nc(C)nc(N4CCN(CCO)CC4)c3)nc2)c(C)ccc1	1	86
Clc1c(-c2c(C(=O)N[C@@H]3C(=O)N4[C@H](C(=O)O)C(C)(C)S[C@@H]34)c(C)on2)c(Cl)ccc1	1	87
Clc1c(NC2=NCCN2)c(Cl)ccc1	1	88
Clc1c(Nc2c(CC(=O)O)cccc2)c(Cl)ccc1	1	89
Clc1c(Nc2c(CC(=O)O)cc(C)cc2)c(F)ccc1	1	90
Clc1c(-c2c(C(=O)N[C@@H]3C(=O)N4[C@@H](C(=O)O)C(C)(C)S[C@H]34)c(C)on2)cccc1	1	91
ClC(Cl)[C@H](c1c(Cl)cccc1)c1ccc(Cl)cc1	1	92
Clc1c(C2=NCC(=O)N(C)c3sc(CC)cc23)cccc1	1	93
Clc1c(CN2Cc3c(scc3)CC2)cccc1	1	94
Clc1c([C@@H](C(=O)OC)N2Cc3c(scc3)CC2)cccc1	1	95
Clc1nc(N)c2ncn([C@H]3[C@@H](F)[C@H](O)[C@@H](CO)O3)c2n1	1	96
Clc1c(CO)n(Cc2ccc(-c3c(-c4n[nH]nn4)cccc3)cc2)c(CCCC)n1	1	97
Clc1sc2C(O)=C(C(=O)Nc3ncccc3)N(C)S(=O)(=O)c2c1	1	98
FC(F)(F)C(OCF)C(F)(F)F	1	99
FC(F)(F)COc1c(C(=O)NC[C@@H]2NCCCC2)cc(OCC(F)(F)F)cc1	1	100
FC(F)(F)COc1c(OCCN[C@@H](Cc2cc(C(=O)N)c3N(CCCO)CCc3c2)C)cccc1	1	101
FC(F)(F)c1c([N+](=O)[O-])ccc(N2C(=O)C(C)(C)NC2=O)c1	1	102
FC(F)(F)c1c([N+](=O)[O-])ccc(NC(=O)C(C)C)c1	1	103
FC(F)(F)c1cc(NC(=O)c2cc(Nc3nc(-c4cnccc4)ccn3)c(C)cc2)cc(-n2cc(C)nc2)c1	1	104
FC(F)(F)c1ccc(NC(=O)c2c(C)onc2)cc1	1	105
FC(F)(F)c1ccc(O[C@@H](CCNC)c2ccccc2)cc1	1	106
FC(F)(F)c1ccc(/C(=N/OCCN)/CCCCOC)cc1	1	107
FC1(F)CCC(C(=O)N[C@@H](CCN2[C@H]3CC(n4c(C(C)C)nnc4C)C[C@@H]2CC3)c2ccccc2)CC1	1	108
FC=1C(NC(=O)OCCCCC)=NC(=O)N([C@H]2[C@H](O)[C@H](O)[C@H](C)O2)C=1	1	109
FC=1C(=O)NC(=O)N([C@H]2O[C@H](CO)[C@H](O)C2)C=1	1	110
FC=1C(=O)NC(=O)N([C@H]2[C@H](O)[C@H](O)[C@@H](C)O2)C=1	1	111
FC=1C(N)=NC(=O)NC=1	1	112
FC=1C(=O)NC(=O)NC=1	1	113
F[C@]12[C@H](O)C[C@]3(C)[C@](O)(C)CC[C@H]3[C@@H]1CCC=1[C@]2(C)CCC(=O)C=1	1	114
Fc1c(N2C[C@@H](C)N[C@@H](C)C2)c(F)c2N(C3CC3)C=C(C(=O)O)C(=O)c2c1N	1	115
Fc1c(C)c2C(=O)C(C(=O)O)=CN(C3CC3)c2cc1N1C[C@H](C)NCC1	1	116
Fc1c(-c2cc(C(=O)O)c(O)cc2)ccc(F)c1	1	117
Fc1c(C(O)(Cn2ncnc2)Cn2ncnc2)ccc(F)c1	1	118
Fc1c(N2c3c(C(=O)C(C(=O)O)=C2)cc(F)c(N2C[C@H](C)NCC2)c3)ccc(F)c1	1	119
Fc1c(N2c3nc(N4C[C@H]5C(N)[C@H]5C4)c(F)cc3C(=O)C(C(=O)O)=C2)ccc(F)c1	1	120
Fc1c(N2c3nc(N4C[C@H]5C(NC(=O)[C@@H](NC(=O)[C@@H](N)C)C)[C@H]5C4)c(F)cc3C(=O)C(C(=O)O)=C2)ccc(F)c1	1	121
Fc1c([C@]2(Cn3ncnc3)OC[C@@H](COc3ccc(N4CCN(c5ccc(N6C(=O)N([C@H]([C@@H](O)C)CC)N=C6)cc5)CC4)cc3)C2)ccc(F)c1	1	122
Fc1c([C@](O)([C@@H](C)c2c(F)cncn2)Cn2ncnc2)ccc(F)c1	1	123
Fc1c(N2CCOCC2)ccc(N2C(=O)O[C@@H](CNC(=O)C)C2)c1	1	124
Fc1c(-c2ccccc2)ccc([C@H](C(=O)O)C)c1	1	125
Fc1c(N2C[C@@H]3NCCC[C@H]3C2)c(OC)c2N(C3CC3)C=C(C(=O)O)C(=O)c2c1	1	126
Fc1c(N2CCNCC2)cc2N(C3CC3)C=C(C(=O)O)C(=O)c2c1	1	127
Fc1c(N2CCNCC2)cc2N(CC)C=C(C(=O)O)C(=O)c2c1	1	128
Fc1c(N2C[C@@H](CN)/C(=N/OC)/C2)nc2N(C3CC3)C=C(C(=O)O)C(=O)c2c1	1	129
Fc1c(N2CCN(C)CC2)c2OC[C@H](C)N3c2c(C(=O)C(C(=O)O)=C3)c1	1	130
Fc1cc2onc(C3CCN(CCC=4C(=O)N5C(=NC=4C)CCCC5)CC3)c2cc1	1	131
Fc1cc2/C(=C/c3c(C)c(C(=O)NCCN(CC)CC)c(C)[nH]3)/C(=O)Nc2cc1	1	132
Fc1ccc(-c2c(/C=C/[C@@H](O)C[C@@H](O)CC(=O)O)c(C(C)C)nc(C(C)C)c2COC)cc1	1	133
Fc1ccc(-c2c(/C=C/[C@H](O)C[C@H](O)CC(=O)O)n(C(C)C)c3c2cccc3)cc1	1	134
Fc1ccc(-c2c(/C=C/[C@@H](O)C[C@@H](O)CC(=O)O)c(C3CC3)nc3c2cccc3)cc1	1	135
Fc1ccc(-c2n(CC[C@H](O)C[C@H](O)CC(=O)O)c(C(C)C)c(C(=O)Nc3ccccc3)c2-c2ccccc2)cc1	1	136
Fc1ccc(C(CCCN2CCC3(N(c4ccccc4)CNC3=O)CC2)c2ccc(F)cc2)cc1	1	137
Fc1ccc([C@H](O)CC[C@@H]2[C@@H](N(c3ccc(F)cc3)C2=O)c2ccc(O)cc2)cc1	1	138
Fc1ccc([C@]2(CCCN(C)C)OCc3c2ccc(C#N)c3)cc1	1	139
Fc1ccc([C@H]2[C@@H](COc3cc4OCOc4cc3)CNCC2)cc1	1	140
IC=1C(=O)NC(=O)N([C@@H]2[C@@H](F)[C@H](O)[C@@H](CO)O2)C=1	1	141
Ic1c(O)c(I)cc(C(=O)c2c(CC)oc3c2cccc3)c1	1	142
Ic1c(OCCN(CC)CC)c(I)cc(C(=O)c2c(CCCC)oc3c2cccc3)c1	1	143
N(CCCN1c2c(cccc2)CCc2c1cccc2)(C)C	1	144
N(CCCN1c2c(cccc2)CCc2c1cccc2)C	1	145
N(CC/C=C/1\c2c(cccc2)CCc2c\1cccc2)(C)C	1	146
N(CC/C=C/1\c2c(cccc2)CCc2c\1cccc2)C	1	147
N(C/C=C/C#CC(C)(C)C)(Cc1c2c(ccc1)cccc2)C	1	148
N([C@H](Cc1ccccc1)C)C	1	149
CN1CCC(=C2c3c(cccc3)C=Cc3c2cccc3)CC1	1	150
C(N1CCN(C)CC1)(c1ccccc1)c1ccccc1	1	151
CN1C[C@@H]2N(c3c(cccc3)Cc3c2cccc3)CC1	1	152
C(C[C@@H]1NCCCC1)(C1CCCCC1)C1CCCCC1	1	153
N[C@H](Cc1ccccc1)C	1	154
Nc1c2c([C@H](c3ccccc3)CN(C)C2)ccc1	1	155
O=C(OC)[C@H]([C@@H]1NCCCC1)c1ccccc1	1	156
O=C(O[C@H]1[C@@H]2[C@@H](CC[C@H](O)C[C@H](O)CC(=O)O)[C@H](C)C=CC2=C[C@H](O)C1)[C@@H](CC)C	1	157
O=C(OC1C[C@@H]2N(C)[C@H](C1)CC2)[C@@H](CO)c1ccccc1	1	158
O=C(OCC)[C@@H](N[C@H](C(=O)N1[C@H](C(=O)O)C[C@H]2[C@@H]1CCC2)C)CCc1ccccc1	1	159
O=C(OCC)[C@H](N[C@H](C(=O)N1[C@H](C(=O)O)C[C@H]2[C@H]1CCCC2)C)CCC	1	160
O=C(OCC)[C@@H](N[C@H](C(=O)N1[C@H](C(=O)O)CCC1)C)CCc1ccccc1	1	161
O=C(OCC)[C@@H](N[C@H](C(=O)N1[C@H](C(=O)O)Cc2c(cccc2)C1)C)CCc1ccccc1	1	162
O=C(O[C@@H]1C=C2[C@H]([C@H]3[C@@H]([C@H]4[C@@](C)([C@](OC(=O)C)(C#C)CC4)CC3)CC2)CC1)C	1	163
O=C(OCC(COC(=O)C)CCn1c2nc(N)ncc2nc1)C	1	164
O=C(Oc1c(C)cc(OCCN(C)C)c(C(C)C)c1)C	1	165
O=C(Oc1c(C(=O)O)cccc1)C	1	166
O=[N+]([O-])c1c(C2C(C(=O)OC)=C(C)NC(C)=C2C(=O)OC)cccc1	1	167
O=[N+]([O-])c1cc([C@@H]2C(C(=O)OC(C)C)=C(C)NC(C)=C2C(=O)OCCOC)ccc1	1	168
O=[N+]([O-])c1cc([C@H]2C(C(=O)OCC)=C(C)NC(C)=C2C(=O)OC)ccc1	1	169
O=C(OCC)CN[C@H](C(=O)N1[C@H](C(=O)NCc2ccc(/C(=N/O)/N)cc2)CC1)C1CCCCC1	1	170
O=C(OC)N[C@H](C(=O)NN(C[C@H](O)[C@@H](NC(=O)[C@@H](NC(=O)OC)C(C)(C)C)Cc1ccccc1)Cc1ccc(-c2ncccc2)cc1)C(C)(C)C	1	171
O=C(OC)Nc1[nH]c2c(n1)ccc(C(=O)c1ccccc1)c2	1	172
O=C(OC)[C@H]1[C@@H](OC(=O)c2ccccc2)C[C@@H]2N(C)[C@H]1CC2	1	173
O=C(Oc1c(C(=O)O)cccc1)c1c(O)cccc1	1	174
O=C(N[C@@H]1[C@H](OC(CC)CC)C=C(C(=O)OCC)C[C@@H]1N)C	1	175
O([C@H](CCNC)c1ccccc1)c1c(C)cccc1	1	176
O=C(N[C@H]1C=2C(c3c(OC)c(OC)c(OC)cc3CC1)=CC=C(OC)C(=O)C=2)C	1	177
O(C)c1c(OC)c(CN2CCNCC2)ccc1OC	1	178
O=C(NCc1ccc(OCCN(C)C)cc1)c1cc(OC)c(OC)c(OC)c1	1	179
O(C)c1c(OC)cc(Cc2c(N)nc(N)nc2)cc1OC	1	180
O=C(O)/C=C(/C=C/C=C(/C=C/c1c(C)c(C)c(OC)cc1C)\C)\C	1	181
O=C(OCC)/C=C(/C=C/C=C(/C=C/c1c(C)c(C)c(OC)cc1C)\C)\C	1	182
O=C(/C=C/c1cc(OC)c(O)cc1)CC(=O)/C=C/c1cc(OC)c(O)cc1	1	183
O(C)c1c(OC)ccc([C@](C#N)(C(C)C)CCCN(CCc2cc(OC)c(OC)cc2)C)c1	1	184
O(C)c1cc2c([C@H]3[C@@H]([C@H]4[C@@](C)([C@](O)(C#C)CC4)CC3)CC2)cc1	1	185
O=C(O[C@@H]1[C@](O)(C(=O)OC)[C@@H]2N(C=O)c3c(cc(c(OC)c3)[C@]3(C(=O)OC)c4[nH]c5c(c4CCN4C[C@](O)(CC)C[C@@H](C3)C4)cccc5)[C@@]32[C@@H]2[C@@]1(CC)C=CCN2CC3)C	1	186
O=C(O)[C@@H](C)c1cc2c(cc(OC)cc2)cc1	1	187
O=C(CCc1cc2c(cc(OC)cc2)cc1)C	1	188
O(C)c1cc2c([C@H](O)[C@H]3N4C[C@H](C=C)[C@@H](C3)CC4)ccnc2cc1	1	189
O=C(Nc1c(CC[C@@H]2N(C)CCCC2)cccc1)c1ccc(OC)cc1	1	190
O(C)c1ccc([C@@H](CN(C)C)C2(O)CCCCC2)cc1	1	191
O=C(OC[C@@H](CCCC)CC)/C=C/c1ccc(OC)cc1	1	192
O=C(N[C@H](C[C@H](O)[C@@H](NC(=O)COc1c(C)cccc1C)Cc1ccccc1)Cc1ccccc1)[C@H](C(C)C)N1C(=O)NCCC1	1	193
O(C[C@H](CN(Cc1ccccc1)c1ccccc1)N1CCCC1)CC(C)C	1	194
O=C(OCC(COC(=O)N)c1ccccc1)N	1	195
O(C[C@@H](N)C)c1c(C)cccc1C	1	196
O=C(O)COc1nn(Cc2ccccc2)c2c1cccc2	1	197
O=C(Nc1cc(C(=O)C)c(OC[C@H](O)CNC(C)C)cc1)CCC	1	198
O(CCc1ccc(OC[C@@H](O)CNC(C)C)cc1)C	1	199
O=C(CCc1ccccc1)c1c(OC[C@H](O)CNCCC)cccc1	1	200
O=C(N[C@H](CC(C)C)c1c(N2CCCCC2)cccc1)Cc1cc(OCC)c(C(=O)O)cc1	1	201
O=C(Nc1ccc(OCC)cc1)C	1	202
O=C(O)c1c2n(Cc3ccc(-c4c(-c5n[nH]nn5)cccc4)cc3)c(OCC)nc2ccc1	1	203
O=COCC=C	1	204
O=C(O)C(CCCOc1c(C)ccc(C)c1)(C)C	1	205
O(CCN(C)C)c1ccc(/C(=C(/CC)\c2ccccc2)/c2ccccc2)cc1	1	206
O=C(O[C@]([C@H](CN(C)C)C)(Cc1ccccc1)c1ccccc1)CC	1	207
O=[N+](OC(CO[N+](=O)[O-])CO[N+](=O)[O-])[O-]	1	208
O=C(O)[C@H](C)c1cc(Oc2ccccc2)ccc1	1	209
O(C)[C@@H]1[C@H](O)CC[C@@H](/C=C(\C)/[C@@H]2[C@H](C)[C@H](O)CC(=O)[C@H](CC=C)/C=C(\C)/C[C@H](C)C[C@@H](OC)[C@H]3[C@H](OC)C[C@@H](C)[C@](O)(C(=O)C(=O)N4[C@H](C(=O)O2)CCCC4)O3)C1	1	210
O([C@@H]1[C@H](C)C(=O)[C@H](C)C(=O)O[C@H](CC)[C@@]2(C)OC(=O)N(CCCCn3cc(-c4cnccc4)nc3)[C@@H]2[C@H](C)C(=O)[C@H](C)C[C@@]1(OC)C)[C@@H]1[C@H](O)[C@@H](N(C)C)C[C@H](C)O1	1	211
O([C@@H]1[C@H](C)[C@H](O[C@@H]2O[C@@H](C)[C@@H](O)[C@@](OC)(C)C2)[C@H](C)C(=O)O[C@@H](CC)[C@](O)(C)[C@H](O)[C@H](C)N(C)C[C@H](C)C[C@]1(O)C)[C@H]1[C@H](O)[C@H](N(C)C)C[C@H](C)O1	1	212
O([C@@H]1[C@H](C)[C@H](O[C@@H]2O[C@H](C)[C@H](O)[C@@](OC)(C)C2)[C@H](C)C(=O)O[C@H](CC)[C@](O)(C)[C@H](O)[C@H](C)C(=O)[C@H](C)C[C@]1(OC)C)[C@@H]1[C@H](O)[C@@H](N(C)C)C[C@H](C)O1	1	213
O=C1N(C)C(=O)OC1(C)C	1	214
O=C(O[C@H]1[C@@H](O)[C@@H](Oc2c(C)c3OC(O)=C(NC(=O)c4cc(C/C=C(\C)/C)c(O)cc4)C(=O)c3cc2)OC(C)(C)[C@H]1OC)N	1	215
O=C(O[C@H]1[C@@H](C)[C@@H](C)OC(=O)[C@@H](C)[C@@H](O[C@H]2O[C@@H](C)[C@@H](OC(=O)C)[C@@H](OC)C2)[C@@H](C)[C@@H](O[C@@H]2[C@H](OC(=O)C)[C@@H](N(C)C)C[C@H](C)O2)[C@@H](C)C[C@@]2(C(=O)[C@H]1C)OC2)C	1	216
O=C(N[C@H]1[C@H](C)OC(=O)[C@@H](C(C)C)N(C)C(=O)CN(C)C(=O)[C@H]2N(C(=O)[C@@H](C(C)C)NC1=O)CCC2)c1c2N=C3C(C(=O)N[C@H]4[C@H](C)OC(=O)[C@H](C(C)C)N(C)C(=O)CN(C)C(=O)[C@@H]5N(C(=O)[C@H](C(C)C)NC4=O)CCC5)=C(N)C(=O)C(C)=C3Oc2c(C)cc1	1	217
O([C@@H]1[C@H](O)[C@@H](O)[C@H](O)O[C@H]1CO)[C@H]1[C@H](O)[C@@H](O)[C@H](O[C@H]2[C@H](O)[C@H](O)[C@@H](N[C@@H]3[C@H](O)[C@@H](O)[C@H](O)C(CO)=C3)[C@H](C)O2)[C@H](CO)O1	1	218
O=C(CO)[C@@]1(O)C[C@@H](O[C@@H]2O[C@H](C)[C@H](O)[C@H](N)C2)c2c(O)c3C(=O)c4c(OC)cccc4C(=O)c3c(O)c2C1	1	219
O=C1N([C@@H]2O[C@@H](CO)C=C2)C=C(C)C(=O)N1	1	220
O(C)[C@@H]1[C@H](O)/C(/C)=C/[C@H](C)C(=O)C[C@H]([C@@H](C[C@@H]2C[C@H](OC)[C@H](O)CC2)C)OC(=O)[C@H]2N(C(=O)C(=O)[C@@]3(O)[C@H](C)CC[C@@H](O3)C[C@@H](OC)/C(/C)=C/C=C/C=C/[C@H](C)C[C@H](C)C1=O)CCCC2	1	221
O=C(O[C@@H]1[C@H]2[C@H](CC[C@@H]3OC(=O)C[C@@H](O)C3)[C@H](C)C=CC2=C[C@H](C)C1)C(CC)(C)C	1	222
O=C(O[C@@H]1[C@H]2[C@H](CC[C@@H]3OC(=O)C[C@@H](O)C3)[C@H](C)C=CC2=C[C@H](C)C1)[C@@H](CC)C	1	223
O([C@@H](CCCCCCCCCCC)C[C@@H]1[C@H](CCCCCC)C(=O)O1)C(=O)[C@@H](NC=O)CC(C)C	1	224
O=C1N([C@@H]2O[C@H](CO)CC2)C=CC(N)=N1	1	225
O=C1NC=Nc2n([C@@H]3O[C@@H](CO)CC3)cnc12	1	226
O=C1N([C@@H]2O[C@@H](CO)[C@@H](N=[N+]=[N-])C2)C=C(C)C(=O)N1	1	227
O=C1N([C@@H]2[C@H](O)[C@@H](O)[C@H](CO)O2)C=CC(N)=N1	1	228
O=C1N([C@H]2[C@H](O)[C@H](O)[C@@H](CO)O2)C=NC(N)=N1	1	229
O=C(N)c1nn([C@@H]2[C@H](O)[C@@H](O)[C@H](CO)O2)cn1	1	230
O=C1[C@H](c2ccccc2)OC(N)=N1	1	231
O([C@H]1[C@@H](O)[C@@H](O)[C@@H]2O[C@@H](C)OC[C@H]2O1)[C@H]1[C@H]2[C@H]([C@H](c3cc(OC)c(O)c(OC)c3)c3c1cc1OCOc1c3)C(=O)OC2	1	232
O[C@@H]1[C@@H]2OC[C@H](O)[C@@H]2OC1	1	233
O=C(O[C@H]1C(C)=C2[C@H](OC(=O)C)C(=O)[C@]3(C)[C@@H](O)C[C@@H]4[C@](OC(=O)C)([C@H]3[C@@H](OC(=O)c3ccccc3)[C@@](O)(C2(C)C)C1)CO4)[C@@H](O)[C@@H](NC(=O)c1ccccc1)c1ccccc1	1	234
O=C(OC(C)(C)C)N[C@H]([C@@H](O)C(=O)O[C@H]1C(C)=C2[C@@H](O)C(=O)[C@]3(C)[C@H](O)C[C@@H]4[C@](OC(=O)C)([C@H]3[C@@H](OC(=O)c3ccccc3)[C@@](O)(C2(C)C)C1)CO4)c1ccccc1	1	235
O=C1[C@H](C)[C@H]2[C@@]34OO[C@@](C)(O[C@H]3O1)CC[C@H]4[C@@H](C)CC2	1	236
O=C1[C@@H]2Oc3c(O)ccc4c3[C@@]32[C@](O)([C@H](N(CC2CC2)CC3)C4)CC1	1	237
O=C(NCCCN(C)c1nc(N)c2c(n1)cc(OC)c(OC)c2)[C@@H]1OCCC1	1	238
O=C1[C@@H](CN2CCOCC2)CCc2[nH]c(C)c(CC)c12	1	239
O=[N+]([O-])c1oc(/C=N/N2C(=O)OCC2)cc1	1	240
O=C(O)C[C@@]1(CC)OCCc2c3c(c(CC)ccc3)[nH]c12	1	241
O=C1OC[C@]2(C)[C@@H]3[C@H]([C@H]4[C@@](C)([C@](O)(C)CC4)CC3)CC[C@H]2C1	1	242
O=C(O)CC/C(=C/Cc1c(OC)c(C)c2c(c1O)C(=O)OC2)/C	1	243
O=C(OCCN1CCOCC1)CC/C(=C/Cc1c(OC)c(C)c2c(c1O)C(=O)OC2)/C	1	244
N(CC/C=C\1/c2c(OCc3c/1cccc3)cccc2)(C)C	1	245
O=C(O)[C@@H]1[C@@H](O)C[C@]2(O)O[C@H]1C[C@@H](O[C@H]1[C@@H](O)[C@@H](N)[C@H](O)[C@@H](C)O1)/C=C/C=C/C=C/C=C/C=C/C=C/C=C/[C@H](C)[C@@H](O)[C@@H](C)[C@H](C)OC(=O)C[C@H](O)C[C@H](O)CC[C@@H](O)[C@H](O)C[C@H](O)C2	1	246
O([C@H]1[C@H](O)[C@@H](O[C@@H]2[C@H](O)[C@@H](NC)[C@](O)(C)CO2)[C@H](NCC)C[C@@H]1N)[C@H]1[C@H](N)CC=C(CN)O1	1	247
O=C1[C@@H]2Oc3c(O)ccc4c3[C@@]32[C@](O)([C@H](N(C)CC3)C4)CC1	1	248
O(C)c1c2O[C@H]3[C@@H](O)C=C[C@H]4[C@@H]5N(C)CC[C@]34c2c(cc1)C5	1	249
O=C([C@@H](O)[C@H](O)C)[C@@H](OC)[C@H]1[C@H](O[C@@H]2O[C@H](C)[C@@H](O)[C@H](O[C@@H]3O[C@H](C)[C@H](O)[C@H](O[C@@H]4O[C@H](C)[C@@H](O)[C@](O)(C)C4)C3)C2)C(=O)c2c(O)c3c(O)c(C)c(O[C@@H]4O[C@H](C)[C@@H](O)[C@H](O[C@@H]5O[C@H](C)[C@@H](O)[C@H](O)C5)C4)cc3cc2C1	1	250
O([C@@H]1[C@@H](C)[C@H](O[C@@H]2O[C@@H](C)[C@H](O)[C@@](OC)(C)C2)[C@@H](C)C(=O)O[C@H](CC)[C@](O)(C)[C@H](O)[C@@H](C)C(=O)[C@H](C)C[C@]1(O)C)[C@H]1[C@H](O)[C@@H](N(C)C)C[C@@H](C)O1	1	251
O(/N=C\1/[C@H](C)[C@@H](O)[C@@](O)(C)[C@@H](CC)OC(=O)[C@H](C)[C@@H](O[C@@H]2O[C@@H](C)[C@H](O)[C@@](OC)(C)C2)[C@H](C)[C@@H](O[C@H]2[C@H](O)[C@@H](N(C)C)C[C@@H](C)O2)[C@@](O)(C)C[C@H]/1C)COCCOC	1	252
O(C)c1c2c(OC(=O)C=3C(=O)CCC2=3)c2[C@@H]3[C@H](Oc2c1)OC=C3	1	253
O[C@@H]1[C@H](c2cc(O)c(O)cc2)Oc2c(c(O)cc(O)c2)C1	1	254
O=C(O)C=1C(=O)c2c(N(CC)N=1)cc1OCOc1c2	1	255
O=[N+]([O-])c1ccc([C@H](CC(=O)C)C=2C(=O)Oc3c(C=2O)cccc3)cc1	1	256
O=C(C[C@@H](c1ccccc1)C=1C(=O)Oc2c(C=1O)cccc2)C	1	257
O=C1C([C@H](CC)c2ccccc2)=C(O)c2c(O1)cccc2	1	258
O=C(O[C@H]1[C@H](C)[C@H](O)[C@H](C)[C@@H](O)[C@@H](C)/C=C/C=C(/C)\C(=O)NC=2C(=O)c3c(O)c(C)c4O[C@@](C)(C(=O)c4c3C3=NC4(NC=23)CCN(CC(C)C)CC4)O/C=C/[C@H](OC)[C@H]1C)C	1	259
O=C(O[C@H]1[C@H](C)[C@H](O)[C@H](C)[C@@H](O)[C@@H](C)/C=C/C=C(/C)\C(=O)Nc2c(/C=N/N3CCN(C)CC3)c(O)c3c(c(O)c(C)c4O[C@@](C)(C(=O)c34)O/C=C/[C@H](OC)[C@H]1C)c2O)C	1	260
O=C(N(CC)CC)N1CCN(C)CC1	1	261
O=C(N(O)CCCCCNC(=O)CCC(=O)N(O)CCCCCN)CCC(=O)NCCCCCN(O)C(=O)C	1	262
O=C(N)[C@@](CCN(C(C)C)C(C)C)(c1ncccc1)c1ccccc1	1	263
O=C(N)N1c2c(cccc2)C=Cc2c1cccc2	1	264
O=C(N)c1c(N=NN(C)C)[nH]cn1	1	265
O=C(N)c1nccnc1	1	266
O=C(NC(C)C)c1ccc(CNNC)cc1	1	267
O=C(NC1C[C@@H]2N(C)[C@H](C1)CCC2)c1nn(C)c2c1cccc2	1	268
O=C(NCCN(CC)CC)c1ccc(N)cc1	1	269
O=C(NN)c1ccncc1	1	270
O=C(NNC(C)C)c1ccncc1	1	271
O=C(NO)N	1	272
O=C(N[C@@H](C(C)(C)C)C(=O)N1[C@H](C(=O)N[C@H](C(=O)C(=O)NC2CC2)CCC)[C@@H]2[C@H](C1)CCC2)[C@@H](NC(=O)c1nccnc1)C1CCCCC1	1	273
O=C(Nc1cc(Nc2nc(-c3cnccc3)ccn2)c(C)cc1)c1ccc(CN2CCN(C)CC2)cc1	1	274
O=C1/C(=C\O)/C[C@]2(C)[C@@H]3[C@H]([C@H]4[C@@](C)([C@](O)(C)CC4)CC3)CC[C@H]2C1	1	275
O=C(O)c1cc(C=2C(=O)/C(=N/NC=3C(=O)N(c4cc(C)c(C)cc4)NC=3C)/C=CC=2)ccc1	1	276
O=C(CO)[C@]1(O)[C@]2(C)[C@H]([C@H]3[C@@H]([C@]4(C)C(=CC(=O)C=C4)CC3)C(=O)C2)CC1	1	277
O=C1C=C2[C@H]([C@@H]3[C@H]([C@H]4[C@@](C)([C@](O)(C#C)CC4)CC3)CC2)CC1	1	278
O=C1C=C2[C@H]([C@@H]3[C@H]([C@H]4[C@@](CC)([C@](O)(C#C)CC4)CC3)CC2)CC1	1	279
O=C1C=C2[C@@](C)([C@H]3[C@@H]([C@H]4[C@@](C)(C(=O)CC4)CC3)CC2=C)C=C1	1	280
O=C(C)[C@@H]1[C@]2(C)[C@H]([C@H]3[C@@H]([C@]4(C)C(=CC(=O)CC4)CC3)CC2)CC1	1	281
O=C1C=C2[C@@](C)([C@@H]3[C@H]([C@H]4[C@@](C)([C@](O)(C)CC4)CC3)CC2)CC1	1	282
O=C1[C@]2(C)[C@H]([C@H]3[C@@H]([C@]4(C)C(=CC3)C[C@@H](O)CC4)CC2)CC1	1	283
O=C(C)[C@@H]1[C@]2(C)[C@@H]([C@@H]3[C@H]([C@@]4(C)C(=CC(=O)CC4)C=C3)CC2)CC1	1	284
O=C(N)N1c2c(C(=O)Cc3c1cccc3)cccc2	1	285
O=C1N(C)C(=O)NC(=O)[C@@]1(CC)c1ccccc1	1	286
O=C1N(C)[C@H]([C@@H](O)[C@H](C/C=C/C)C)C(=O)N[C@H](CC)C(=O)N(C)CC(=O)N(C)[C@H](CC(C)C)C(=O)N[C@@H](C(C)C)C(=O)N(C)[C@H](CC(C)C)C(=O)N[C@H](C)C(=O)N[C@H](C)C(=O)N(C)[C@H](CC(C)C)C(=O)N(C)[C@H](CC(C)C)C(=O)N(C)[C@@H]1C(C)C	1	287
O=C(N)[C@@H](CC)N1C(=O)CCC1	1	288
O=C(CCCCN1C(=O)N(C)c2ncn(C)c2C1=O)C	1	289
O=C1N(CCCCN2CCN(c3ncccn3)CC2)C(=O)CC2(C1)CCCC2	1	290
O=C1N(Cc2ccc(-c3c(-c4n[nH]nn4)cccc3)cc2)C(CCCC)=NC21CCCC2	1	291
O=C1N(N(c2ccccc2)C(=O)C1CCCC)c1ccccc1	1	292
O=C1N(Cc2ccc(-c3c(-c4n[nH]nn4)cccc3)cc2)c2nc(C)nc(C)c2CC1	1	293
O(C(CO)CO)Cn1c2N=C(N)NC(=O)c2nc1	1	294
O(CCO)Cn1c2N=C(N)NC(=O)c2nc1	1	295
O=C(OCCOCn1c2N=C(N)NC(=O)c2nc1)[C@@H](N)C(C)C	1	296
O=C1[C@](CC)(C)CC(=O)N1	1	297
O=C1[C@](CC)(c2ccccc2)CCC(=O)N1	1	298
O=C1[C@@H](N2C(=O)c3c(C2=O)cccc3)CCC(=O)N1	1	299
O=C1[C@H](N2C(=O)c3c(c(N)ccc3)C2)CCC(=O)N1	1	300
O=C1C(CC=C)(CC(C)C)C(=O)NC(=O)N1	1	301
O=C1C(CC)(c2ccccc2)C(=O)NC(=O)N1	1	302
O=C1C(c2ccccc2)(c2ccccc2)NC(=O)N1	1	303
O=C1NC=Nc2[nH]ncc12	1	304
O=C1Nc2c(c(CCN(CCC)CCC)ccc2)C1	1	305
O=C1Nc2c(C)ccnc2N(C2CC2)c2ncccc12	1	306
O=C1C(C)=CC(=O)c2c1cccc2	1	307
O=C(O)C=1C(=O)c2c(N(CC)C=1)nc(C)cc2	1	308
O=C(N)c1ncn2C(=O)N(C)N=Nc12	1	309
O=C(O)[C@@H](C)c1ccc(CC(C)C)cc1	1	310
O=C(O)C(CCC)CCC	1	311
O=C(O)[C@@H](NC(=O)C1CCC(C(C)C)CC1)Cc1ccccc1	1	312
O=C(O)[C@@H](NC(=O)c1ccc(N(Cc2nc3c(N)nc(N)nc3nc2)C)cc1)CCC(=O)O	1	313
O=C(O)[C@@H]1c2n(c(C(=O)c3ccccc3)cc2)CC1	1	314
O=C(O)[C@@H](N[C@H](C(=O)N1[C@H](C(=O)O)CCC1)CCCCN)CCc1ccccc1	1	315
O=C(O)C[C@@H](CN)CC(C)C	1	316
O=C(O)CCCCCCNC1c2c(cccc2)CCc2c1cccc2	1	317
O=C(O)Cc1ccc(CC(C)C)cc1	1	318
O=C(O)Cc1n(C)c(C(=O)c2ccc(C)cc2)cc1	1	319
O=C(O)/C=C(\C=C\C=C(\C=C\C=1C(C)(C)CCCC=1C)/C)/C	1	320
O=C(O)c1c2c(nc(-c3ccccc3)c1)cccc2	1	321
O=C(O)c1c(Nc2c(C)c(C)ccc2)cccc1	1	322
O=C(O)c1cnccc1	1	323
O=C(N[C@@H]([C@@H](O)CN1[C@H](C(=O)NC(C)(C)C)C[C@H]2[C@H](C1)CCCC2)Cc1ccccc1)[C@@H](NC(=O)c1nc2c(cc1)cccc2)CC(=O)N	1	324
OC(CO)CO	1	325
O=C(N)C=1C(=O)[C@@]2(O)C(O)=C3C(=O)c4c(O)cccc4C(=C)[C@H]3[C@H](O)[C@H]2[C@H](N(C)C)C=1O	1	326
O=C(N)C=1C(=O)[C@@]2(O)C(O)=C3C(=O)c4c(O)cccc4[C@H](C)[C@@H]3[C@@H](O)[C@@H]2[C@H](N(C)C)C=1O	1	327
O=C(Nc1c(O)c2C(=O)C3=C(O)[C@]4(O)C(=O)C(C(=O)N)=C(O)[C@@H](N(C)C)[C@H]4C[C@H]3Cc2c(N(C)C)c1)CNC(C)(C)C	1	328
O=C(N)C=1C(=O)[C@@]2(O)C(O)=C3C(=O)c4c(O)ccc(N(C)C)c4C[C@H]3C[C@@H]2[C@H](N(C)C)C=1O	1	329
O=C(N)C=1C(=O)[C@@]2(O)C(O)=C3C(=O)c4c(O)cccc4[C@](O)(C)[C@@H]3C[C@@H]2[C@H](N(C)C)C=1O	1	330
O=C(CO)[C@]1(O)[C@]2(C)[C@H]([C@H]3[C@H]([C@H](O)C2)[C@]2(C)C(=CC(=O)C=C2)CC3)CC1	1	331
O=C(CO)[C@]1(O)[C@]2(C)[C@H]([C@H]3[C@H]([C@H](O)C2)[C@]2(C)C(=CC(=O)CC2)CC3)CC1	1	332
O=C(CO)[C@]1(O)[C@]2(C)[C@H]([C@@H]3[C@@H]([C@@H](O)C2)[C@]2(C)C([C@H](C)C3)=CC(=O)C=C2)CC1	1	333
O=C(O)CC[C@H](C)[C@@H]1[C@]2(C)[C@H]([C@@H]3[C@@H](O)C[C@@H]4[C@@](C)([C@H]3CC2)CC[C@H](O)C4)CC1	1	334
O=C(N[C@@H]1C(=O)N[C@H]([C@@H](O)C)C(=O)N2[C@@H](C(=O)N[C@H]([C@@H](O)[C@H](O)c3ccc(O)cc3)C(=O)N[C@H]([C@@H](O)CCN)C(=O)N3[C@H]([C@H](O)CC3)C(=O)N[C@@H](NCCN)[C@@H](O)C1)C[C@@H](O)C2)CCCCCCCC[C@H](C[C@H](CC)C)C	1	335
O[C@@H]1C(=C)/C(=C\C=C/2\[C@H]3[C@@](C)([C@@H]([C@@H](CCCC(C)C)C)CC3)CCC\2)/C[C@@H](O)C1	1	336
O=C1C=C2[C@@](C)([C@@H]3[C@H]([C@H]4[C@@](C)([C@H](O)CC4)CC3)CC2)CC1	1	337
O[C@H]1[C@]2(C)[C@H]([C@H]3[C@@H](c4c(cc(O)cc4)CC3)CC2)CC1	1	338
OC(CCC[C@H](C)[C@@H]1[C@]2(C)[C@H](/C(=C/C=C\3/C(=C)CC[C@H](O)C/3)/CCC2)CC1)(C)C	1	339
O=C(N[C@@H]1[C@H](O)Cc2c1cccc2)[C@@H](C[C@@H](O)CN1[C@@H](C(=O)NC(C)(C)C)CN(Cc2cnccc2)CC1)Cc1ccccc1	1	340
OCC	1	341
OC[C@@H](NCCN[C@H](CO)CC)CC	1	342
OC[C@@H]1C=C[C@@H](n2c3nc(N)nc(NC4CC4)c3nc2)C1	1	343
OCC=C	1	344
OCCO	1	345
O=[N+]([O-])c1n(CCO)c(C)nc1	1	346
OC/C=C(/C=C/C=C(/C=C/C=1C(C)(C)CCCC=1C)\C)\C	1	347
OCC(N[C@@H]1[C@H](O)[C@@H](O)[C@H](O)[C@@](O)(CO)C1)CO	1	348
O[C@]1(C)[C@@]2(C)[C@@H]([C@@H]3[C@H]([C@]4(C)[C@H](Cc5[nH]ncc5C4)CC3)CC2)CC1	1	349
O[C@]1(C#C)[C@]2(CC)[C@H]([C@H]3[C@H](C(=C)C2)[C@@H]2C(=CCCC2)CC3)CC1	1	350
O=C(O)[C@H]1/C(=C/CO)/O[C@@H]2N1C(=O)C2	1	351
O=[N+]([O-])c1c(O)c(O)cc(C(=O)c2ccc(C)cc2)c1	1	352
O=[N+]([O-])c1c(O)c(O)cc(/C=C(/C(=O)N(CC)CC)\C#N)c1	1	353
O=C1c2c(O)ccc(O)c2C(=O)c2c(NCCNCCO)ccc(NCCNCCO)c12	1	354
Oc1c2ncccc2ccc1	1	355
O=C(O)c1c(O)cc(N)cc1	1	356
O[C@H](CN[C@H](Cc1ccc(O)cc1)C)c1cc(O)cc(O)c1	1	357
O[C@@H](CNC)c1cc(O)ccc1	1	358
O=C(O)[C@@](N)(Cc1cc(O)c(O)cc1)C	1	359
O=C1[C@]2(C)[C@H]([C@H]3[C@@H](c4c(cc(O)cc4)CC3)CC2)CC1	1	360
Oc1cc2c([C@@H]3[C@H]([C@H]4[C@@](C)([C@](O)(C#C)CC4)CC3)CC2)cc1	1	361
O=C(O)c1c(O)ccc(N)c1	1	362
O=C(O)c1c(O)ccc(N=Nc2cc(C(=O)O)c(O)cc2)c1	1	363
O=C(Nc1ccc(O)cc1)C	1	364
O[C@H]([C@H](NCCc1ccc(O)cc1)C)c1ccc(O)cc1	1	365
O=C1C(c2ccc(O)cc2)(c2ccc(O)cc2)c2c(N1)cccc2	1	366
O=C(N)c1c(O)ccc([C@@H](O)CN[C@H](CCc2ccccc2)C)c1	1	367
O=C(O)c1ccc(-n2c(-c3c(O)cccc3)nc(-c3c(O)cccc3)n2)cc1	1	368
P(=O)(O)(O)C(P(=O)(O)O)(O)CCCN	1	369
P(=O)(O)(O)C(P(=O)(O)O)(O)Cc1cnccc1	1	370
P(=O)(O)(O)C(P(=O)(O)O)(O)Cn1cncc1	1	371
P(=O)(O)(O)CO[C@H](Cn1c2ncnc(N)c2nc1)C	1	372
[P@@](=O)(O[C@@H](OC(=O)CC)C(C)C)(CC(=O)N1[C@H](C(=O)O)C[C@H](C2CCCCC2)C1)CCCCc1ccccc1	1	373
P(=O)(OC[C@H]1[C@@H](O)[C@@H](O)[C@@H](n2c3nc(F)nc(N)c3nc2)O1)(O)O	1	374
S(=O)(=O)(C)c1ccc(C2=C(c3ccccc3)C(=O)OC2)cc1	1	375
S(=O)(=O)(C[C@](O)(C(=O)Nc1cc(C(F)(F)F)c(C#N)cc1)C)c1ccc(F)cc1	1	376
S(=O)(=O)(N(C)c1nc(C(C)C)c(/C=C/[C@H](O)C[C@H](O)CC(=O)O)c(-c2ccc(F)cc2)n1)C	1	377
S(=O)(=O)(N(C[C@H](O)[C@H](NC(=O)O[C@H]1COCC1)Cc1ccccc1)CC(C)C)c1ccc(N)cc1	1	378
S(=O)(=O)(N(C[C@@H](O)[C@H](NC(=O)O[C@H]1[C@H]2[C@@H](OC1)OCC2)Cc1ccccc1)CC(C)C)c1ccc(N)cc1	1	379
S(=O)(=O)(N(C[C@@H](OP(=O)(O)O)[C@@H](NC(=O)O[C@@H]1COCC1)Cc1ccccc1)CC(C)C)c1ccc(N)cc1	1	380
S(=O)(=O)(N)Cc1noc2c1cccc2	1	381
S(=O)(=O)(N)c1cc(C(=O)NC[C@H]2N(CC)CCC2)c(OC)cc1	1	382
S(=O)(=O)(N)c1c(C)ccc(Nc2nc(N(C)c3cc4nn(C)c(C)c4cc3)ccn2)c1	1	383
S(=O)(=O)(N)c1c(C(F)(F)F)cc2N[C@@H](Cc3ccccc3)NS(=O)(=O)c2c1	1	384
S(=O)(=O)(N)c1ccc(-n2c(-c3ccc(C)cc3)cc(C(F)(F)F)n2)cc1	1	385
S(=O)(=O)(N)c1ccc(N)cc1	1	386
S(=O)(=O)(N1CCN(C)CC1)c1cc(c(OCC)cc1)C1=Nc2c(CCC)nn(C)c2C(=O)N1	1	387
S(=O)(=O)(NC(=O)NC1CCC(C)CC1)c1ccc(CCNC(=O)N2C(=O)C(CC)=C(C)C2)cc1	1	388
S(=O)(=O)(NC(=O)NC1CCCCC1)c1ccc(C(=O)C)cc1	1	389
S(=O)(=O)(NC(=O)NCCCC)c1ccc(C)cc1	1	390
S(=O)(=O)(NC(=O)NN1C[C@H]2[C@@H](C1)CCC2)c1ccc(C)cc1	1	391
S(=O)(=O)(NC(=O)NN1CCCCCC1)c1ccc(C)cc1	1	392
S(=O)(=O)(NC(=O)c1cc(OC)c(Cc2c3c(n(C)c2)ccc(NC(=O)OC2CCCC2)c3)cc1)c1c(C)cccc1	1	393
S(=O)(=O)(NC)CCc1cc2c(C3CCN(C)CC3)c[nH]c2cc1	1	394
S(=O)(=O)(Nc1cc(OC)c(Nc2c3c(nc4c2cccc4)cccc3)cc1)C	1	395
S(=O)(=O)(Nc1cc([C@H](CC)C=2C(=O)O[C@](CCC)(CCc3ccccc3)CC=2O)ccc1)c1ncc(C(F)(F)F)cc1	1	396
S(=O)(=O)(Nc1cc2c([nH]c(C(=O)N3CCN(c4c(NC(C)C)cccn4)CC3)c2)cc1)C	1	397
S(=O)(=O)(Nc1c(Oc2ccccc2)cc([N+](=O)[O-])cc1)C	1	398
S(=O)(=O)(Nc1n(-c2ccccc2)ncc1)c1ccc(N)cc1	1	399
S(=O)(=O)(Nc1c(Oc2c(OC)cccc2)c(OCCO)nc(-c2ncccn2)n1)c1ccc(C(C)(C)C)cc1	1	400
S(=O)(=O)(Nc1ncccc1)c1ccc(N=Nc2cc(C(=O)O)c(O)cc2)cc1	1	401
S(=O)(=O)(Nc1ncccn1)c1ccc(N)cc1	1	402
S(=O)(=O)(Nc1noc(C)c1)c1ccc(N)cc1	1	403
S(=O)(=O)(c1ccc(N)cc1)c1ccc(N)cc1	1	404
[S@H0](=O)(C)c1ccc(/C=C\2/C(C)=C(CC(=O)O)c3c/2ccc(F)c3)cc1	1	405
[S@@H0](=O)(CCC1C(=O)N(N(c2ccccc2)C1=O)c1ccccc1)c1ccccc1	1	406
[S@H0](=O)(Cc1c(C)c(OC)c(C)cn1)c1[nH]c2c(n1)cc(OC)cc2	1	407
[S@H0](=O)(Cc1c(OC)c(OC)ccn1)c1[nH]c2c(n1)ccc(OC(F)F)c2	1	408
[S@H0](=O)(Cc1c(C)c(OCC(F)(F)F)ccn1)c1[nH]c2c(n1)cccc2	1	409
[S@H0](=O)(Cc1c(C)c(OCCCOC)ccn1)c1[nH]c2c(n1)cccc2	1	410
S(C(=O)C)[C@@H]1[C@H]2[C@H]3[C@@](C)([C@@]4(OC(=O)CC4)CC3)CC[C@@H]2[C@]2(C)C(=CC(=O)CC2)C1	1	411
S(C(C)C)c1ccc([C@H](O)[C@@H](CNCCCCCCC)C)cc1	1	412
S([C@H]1C[C@H](C(=O)N(C)C)NC1)C=1[C@@H](C)[C@H]2[C@H]([C@H](O)C)C(=O)N2C=1C(=O)O	1	413
S([C@@H]1C[C@@H](C(=O)Nc2cc(C(=O)O)ccc2)NC1)C=1[C@H](C)[C@H]2[C@H]([C@@H](O)C)C(=O)N2C=1C(=O)O	1	414
S(C[C@H](NC(=O)c1c(C)c(O)ccc1)[C@H](O)CN1[C@@H](C(=O)NC(C)(C)C)C[C@H]2[C@H](C1)CCCC2)c1ccccc1	1	415
S(CC[C@@H](N)C(=O)O)CC	1	416
S(CCC)c1cc2nc(NC(=O)OC)[nH]c2cc1	1	417
S(CCNC=N)C1=C(C(=O)O)N2C(=O)[C@@H]([C@H](O)C)[C@H]2C1	1	418
S(CCN/C(=N/C)/NC#N)Cc1c(C)nc[nH]1	1	419
S(CCN/C(/NCc1cc2OCOc2cc1)=C/[N+](=O)[O-])Cc1oc(CN(C)C)cc1	1	420
S(CCN/C(/NC)=C/[N+](=O)[O-])Cc1oc(CN(C)C)cc1	1	421
S(=O)(=O)(O)CCNC(=O)CC[C@@H](C)[C@@H]1[C@]2(C)[C@H]([C@@H]3[C@@H](O)C[C@H]4[C@@](C)([C@H]3CC2)CC[C@@H](O)C4)CC1	1	422
S(=O)(=O)(O)CN(C)C=1C(=O)N(N(C)C=1C)c1ccccc1	1	423
S(=O)(=O)(O[C@@H]1[C@@H](OC(=O)CC(C)C)[C@H](O[C@@H]2C[C@@H](C(=O)O)[C@@H]3[C@](C)([C@H]4[C@@]5([C@@H](O)C(=C)[C@@H](C5)CC4)CC3)C2)O[C@H](CO)[C@H]1OS(=O)(=O)O)O	1	424
S(=O)(=O)(OCCCCOS(=O)(=O)C)C	1	425
S(=O)(=O)(Oc1c(O)ccc([C@@H](O)[C@@H](O)[C@H]2C(=O)N[C@@H]([C@H](O)CC(=O)N)C(=O)N3[C@H]([C@H](O)[C@H](C)C3)C(=O)N[C@@H](O)[C@@H](O)C[C@H](NC(=O)c3ccc(-c4noc(-c5ccc(OCCCCC)cc5)c4)cc3)C(=O)N[C@@H]([C@H](O)C)C(=O)N3[C@H](C(=O)N2)C[C@H](O)C3)c1)O	1	426
S(SC(=S)N(CC)CC)C(=S)N(CC)CC	1	427
S(c1n(C)cnc1[N+](=O)[O-])c1ncnc2nc[nH]c12	1	428
O=C(Nc1ncccc1)C=1N(C)S(=O)(=O)c2c(C=1O)cccc2	1	429
O(CC1(C)CCCCC1)c1ccc(C[C@@H]2C(=O)NC(=O)S2)cc1	1	430
O(C[C@@]1(C)Oc2c(C)c(C)c(O)c(C)c2CC1)c1ccc(C[C@@H]2C(=O)NC(=O)S2)cc1	1	431
O(CCN(C)c1ncccc1)c1ccc(C[C@H]2C(=O)NC(=O)S2)cc1	1	432
O(CCc1ncc(CC)cc1)c1ccc(C[C@H]2C(=O)NC(=O)S2)cc1	1	433
O=C(N[C@H]1C(=O)N2C(C(=O)O)=C(C)CS[C@@H]12)[C@@H](N)c1ccc(O)cc1	1	434
O=C(N[C@@H]1C(=O)N2[C@H](C(=O)O)C(C)(C)S[C@H]12)[C@H](N)c1ccc(O)cc1	1	435
O=C(N[C@H]1C(=O)N2[C@H](C(=O)O)C(C)(C)S[C@H]12)[C@H](NC(=O)N1C(=O)C(=O)N(CC)CC1)c1ccccc1	1	436
S(=O)(=O)(C)N1C(=O)N(C(=O)N[C@H](C(=O)N[C@H]2C(=O)N3[C@@H](C(=O)O)C(C)(C)S[C@@H]23)c2ccccc2)CC1	1	437
O=C(O)[C@H]1C(C)(C)S[C@@H]2[C@H](NC(=O)c3c(OC)cccc3OC)C(=O)N12	1	438
O=C(O)[C@H]1C(C)(C)S[C@@H]2[C@H](NC(=O)c3c(C)onc3-c3ccccc3)C(=O)N12	1	439
O=C1N([C@@H]2O[C@@H](CO)SC2)C=CC(N)=N1	1	440
O=C(O)CCCC[C@H]1SC[C@H]2NC(=O)N[C@@H]12	1	441
[C@@H]1(c2ccccc2)N=C2SCCN2C1	1	442
O=C(N[C@H]1C(=O)N[C@@H](Cc2ccc(O)cc2)C(=O)N[C@@H](Cc2c3c([nH]c2)cccc3)C(=O)N[C@@H](CCCCN)C(=O)N[C@H](C(C)C)C(=O)N[C@H](C(=O)N[C@H]([C@H](O)C)C(=O)N)CSSC1)[C@@H](N)Cc1cc2c(cc1)cccc2	1	443
O=C(N[C@H]1C(=O)N[C@@H](Cc2ccccc2)C(=O)N[C@@H](Cc2c3c([nH]c2)cccc3)C(=O)N[C@@H](CCCCN)C(=O)N[C@@H]([C@H](O)C)C(=O)N[C@@H](C(=O)N[C@@H]([C@H](O)C)CO)CSSC1)[C@@H](N)Cc1ccccc1	1	444
S(CC1=C(C(=O)O)N2C(=O)[C@@H](NC(=O)[C@H](O)c3ccccc3)[C@H]2SC1)c1n(C)nnn1	1	445
O=C(Oc1c(C)c2OCOc2c2[C@H]3N4[C@@H](O)[C@H]5N(C)[C@@H]([C@@H]4[C@H](SC[C@@]4(C(=O)OC3)NCCc3c4cc(OC)c(O)c3)c12)c1c(O)c(OC)c(C)cc1C5)C	1	446
O=C1c2c(NCCN(CC)CC)ccc(CO)c2Sc2c1cccc2	1	447
S(C)c1cc2N(CC[C@H]3N(C)CCCC3)c3c(Sc2cc1)cccc3	1	448
FC(F)(F)c1cc2N(CCCN3CCN(C)CC3)c3c(Sc2cc1)cccc3	1	449
S1c2c(Nc3c1cccc3)cccc2	1	450
O(CCO)CCN1CCN(C2=Nc3c(Sc4c2cccc4)cccc3)CC1	1	451
S=C(N(CC(=O)O)C)c1c2c(c(C(F)(F)F)c(OC)cc2)ccc1	1	452
S=C(N)c1cc(CC)ncc1	1	453
S=C1N(C(=O)OCC)C=CN1C	1	454
S=C1N=C(N)Nc2nc[nH]c12	1	455
S=C1N=CNc2nc[nH]c12	1	456
S=C1NC(=O)C=C(CCC)N1	1	457
S=C1N(C)C=CN1	1	458
S=C=Nc1c2c(ccc1)cccc2	1	459
S=P(N1CC1)(N1CC1)N1CC1	1	460
SC([C@H](N)C(=O)O)(C)C	1	461
S[C@@H]([C@@H](S)C(=O)O)C(=O)O	1	462
S[C@H](CS)CO	1	463
SC[C@H](C(=O)N1[C@H](C(=O)O)CCC1)C	1	464
[S+](CCCNC(=O)c1nc(-c2nc(CCNC(=O)[C@@H](NC(=O)[C@H]([C@H](O)[C@H](NC(=O)[C@@H](NC(=O)c3c(C)c(N)nc([C@@H](NC[C@H](N)C(=O)N)CC(=O)N)n3)[C@@H](O[C@H]3[C@H](O[C@@H]4[C@H](O)[C@H](OC([O-])=N)[C@H](O)[C@@H](CO)O4)[C@H](O)[C@@H](O)[C@@H](CO)O3)c3[nH]cnc3)C)C)[C@H](O)C)sc2)sc1)(C)C	1	465
N(=Nc1ccccc1)c1c(N)nc(N)cc1	1	466
CN1CC/C(=C\2/c3ncccc3CCc3c/2cccc3)/CC1	1	467
CN1C[C@@H]2N(c3ncccc3Cc3c2cccc3)CC1	1	468
N(CCc1ncccc1)C	1	469
N(CCN(Cc1ccccc1)c1ncccc1)(C)C	1	470
N(C(C)C)c1ncccn1	1	471
N#Cc1ccc(C(n2ncnc2)c2ccc(C#N)cc2)cc1	1	472
N#CC(C)(C)c1cc(C(C#N)(C)C)cc(Cn2ncnc2)c1	1	473
N(N)c1nncc2c1cccc2	1	474
O=C(O)CCc1oc(c(-c2ccccc2)n1)-c1ccccc1	1	475
O=[N+]([O-])c1oc(/C=N/N2C(=O)NC(=O)C2)cc1	1	476
O=[N+]([O-])c1ccc(-c2oc(/C=N/N3C(=O)NC(=O)C3)cc2)cc1	1	477
O=C(c1c(CC)oc2c1cccc2)c1ccc(O)cc1	1	478
O[C@]1(C#C)[C@]2(C)[C@H]([C@H]3[C@@H]([C@]4(C)C(=Cc5oncc5C4)CC3)CC2)CC1	1	479
O=C(O)[C@@H](NC(=O)c1sc(N(Cc2cc3C(=O)NC(C)=Nc3cc2)C)cc1)CCC(=O)O	1	480
O=C(Nc1sc(C)cn1)C=1N(C)S(=O)(=O)c2c(C=1O)cccc2	1	481
S(=O)(=O)(Nc1sc(C)nn1)c1ccc(N)cc1	1	482
S(=O)(=O)(N)c1sc(NC(=O)C)nn1	1	483
CN1CCN(C2=Nc3c(Nc4sc(C)cc24)cccc3)CC1	1	484
O=C(N(O)[C@@H](C)c1sc2c(c1)cccc2)N	1	485
FC(F)(F)Oc1cc2sc(N)nc2cc1	1	486
O=C1[C@H](C)[C@@H](O)[C@@H](C)CCC[C@@]2(C)O[C@H]2C[C@@H](/C(=C/c2nc(C)sc2)/C)NC(=O)C[C@H](O)C1(C)C	1	487
S(CCN/C(/NC)=C/[N+](=O)[O-])Cc1nc(CN(C)C)sc1	1	488
O=C(N[C@@H]1C(=O)N2C(C(=O)O)=C(C=C)CS[C@H]12)/C(=N\O)/c1nc(N)sc1	1	489
S(CC1=C(C(=O)O)N2C(=O)[C@@H](NC(=O)/C(=N\OC)/c3nc(N)sc3)[C@@H]2SC1)C=1N(C)NC(=O)C(=O)N=1	1	490
O=C(N[C@@H]1C(=O)N2C(C(=O)O)=CCS[C@H]12)/C(=N\OC)/c1nc(N)sc1	1	491
O=C(N[C@@H]1C(=O)N2C(C(=O)O)=C(C=C)CS[C@H]12)/C(=N\OCC(=O)O)/c1nc(N)sc1	1	492
S(CC1=C(C(=O)O)N2C(=O)[C@@H](NC(=O)Cc3nc(N)sc3)[C@@H]2SC1)c1n(CCN(C)C)nnn1	1	493
S(=O)(=O)(/N=C(\N)/CCSCc1nc(/N=C(\N)/N)sc1)N	1	494
O([C@@H](CCNC)c1sccc1)c1c2c(ccc1)cccc2	1	495
O=C(N[C@H]1C(=O)N2C(C(=O)O)=C(COC(=O)C)CS[C@@H]12)Cc1sccc1	1	496
O=C(N[C@H]1C(=O)N2C(C(=O)[O-])=C(C[n+]3ccccc3)CS[C@@H]12)Cc1sccc1	1	497
N(CCN(Cc1sccc1)c1ncccc1)(C)C	1	498
O=C(Nc1sccn1)C=1N(C)S(=O)(=O)c2c(C=1O)cccc2	1	499
O=C(OCc1scnc1)N[C@@H]([C@@H](O)C[C@@H](NC(=O)[C@@H](NC(=O)N(Cc1nc(C(C)C)sc1)C)C(C)C)Cc1ccccc1)Cc1ccccc1	1	500
Clc1ccc(C(N2CCN(CCOCCOC(=O)c3c(O)c(Cc4c(O)c(C(=O)O)cc5c4cccc5)c4c(c3)cccc4)CC2)c2ccccc2)cc1	1	501
ClC(Cl)CCl	1	502
N(N)(C)C	1	503
Cl/C=C/CCl	1	504
Oc1cc2c(cc1)cccc2	1	505
O=[N+]([O-])C(C)C	1	506
Clc1cc(Cl)cc(N2C(=O)CCC2=O)c1	1	507
O(C)c1c2c(occ2)cc2OC(=O)C=Cc12	1	508
O=C(OC1CC=2[C@@](C)(C3C(C4[C@@](C)(C(c5cnccc5)=CC4)CC3)CC=2)CC1)C	1	509
O=C[C@H](O)[C@@H](O)[C@H](O[C@@H]1[C@H](O)[C@@H](O)[C@H](O[C@@H]2[C@H](O)[C@@H](O)[C@H](N[C@@H]3[C@H](O)[C@@H](O)[C@H](O)C(CO)=C3)[C@@H](C)O2)C(CO)O1)[C@H](O)CO	1	510
OC(C#N)(C)C	1	511
O=C(C)c1cc2N(CCCN3CCN(CCO)CC3)c3c(Sc2cc1)cccc3	1	512
P(=O)(OCOC(=O)C(C)(C)C)(OCOC(=O)C(C)(C)C)COCCn1c2ncnc(N)c2nc1	1	513
OC[C@@H]1[C@@H](O)[C@@H](O)[C@H](n2c3ncnc(N)c3nc2)O1	1	514
O(C)c1c(/C=C\2/C(c3cnccc3)=NCCC/2)ccc(OC)c1	1	515
O(C)c1c2c(OC(O)=C3C(O)=CC=C23)c2[C@H]3[C@@H](Oc2c1)OC=C3	1	516
O=C(NCCc1c2c(ccc(OC)c2)ccc1)C	1	517
S(C(=O)C)CC(C(=O)N1C(C(=O)NC(C(=O)O)Cc2ccccc2)CCC1)C	1	518
ClC1(Cl)[C@]2(Cl)C(Cl)=C(Cl)[C@@]1(Cl)C1[C@H]2[C@@H]2C=C[C@H]1C2	1	519
O=C(NCC(C(=O)N)(C)C)[C@H](C(C)C)C[C@H](O)C(N)C[C@@H](C(C)C)Cc1cc(OCCCOC)cc(OC)c1	1	520
Fc1ccc(C(N2CCN(c3nc(NCC=C)nc(NCC=C)n3)CC2)c2ccc(F)cc2)cc1	1	521
O=C1N(Cc2c(C)[nH]cn2)CCc2n(C)c3c(c12)cccc3	1	522
Clc1cc2C(c3ccccc3)=NCc3n(c(C)nn3)-c2cc1	1	523
O=C(O)CN1C(=O)c2c3c(ccc2)cccc3C1=O	1	524
O=C(NCC(=O)O)C(CN1CC(C)C(C)(c2cc(O)ccc2)CC1)Cc1ccccc1	1	525
O=C(O)[C@H]1C(C)(C)S[C@@H]2[C@H](/N=C/N3CCCCCC3)C(=O)N12	1	526
Nc1c(N)ccnc1	1	527
O=C(N[C@H]1[C@H](O[C@@H]2[C@H](O)[C@@H](N)[C@H](O)[C@@H](CO)O2)[C@@H](O)[C@H](O[C@@H]2[C@H](O)[C@@H](O)[C@H](O)[C@@H](CN)O2)[C@@H](N)C1)[C@@H](O)CCN	1	528
Clc1c(N)nc(N)c(C(=O)NC(=N)N)n1	1	529
O=C(O)CCC(=O)CN	1	530
Clc1c(C2/C(=C(\OCC)/O)/C(COCCN)=NC(C)=C2C(=O)OC)cccc1	1	531
O=C1N(CCN(C)C)C(=O)c2c3c(cc(N)cc13)ccc2	1	532
Clc1c(Cl)ccc2Nc3n(cc(O)n3)Cc12	1	533
O(C)c1ccc(C2C(=O)c3c(C2=O)cccc3)cc1	1	534
N(Cc1ccccc1)(CC1=NCCN1)c1ccccc1	1	535
FC(F)(F)c1cc(N2CCN(CCOC(=O)c3c(Nc4c5c(ncc4)cc(C(F)(F)F)cc5)cccc3)CC2)ccc1	1	536
FC(F)(F)c1cc([C@H](O[C@@H]2[C@@H](N(CC3=NNC(=O)N3)CCO2)c2ccc(F)cc2)C)cc(C(F)(F)F)c1	1	537
O=CNc1c(O)ccc([C@H](O)CN[C@@H](Cc2ccc(OC)cc2)C)c1	1	538
S(=O)(=O)(N[C@H](C(=O)N1[C@@H](C(=O)O)C[C@H](C)CC1)CCC/N=C(\N)/N)c1c2NCC(C)Cc2ccc1	1	539
Clc1cc2[C@@H]3[C@@H](c4c(Oc2cc1)cccc4)CN(C)C3	1	540
Clc1ccc(C2CCC(C=3C(=O)C(=O)c4c(C=3O)cccc4)CC2)cc1	1	541
Clc1nc(NC(C)C)nc(NCC)n1	1	542
Clc1c(OC)ccc(CNc2c(C(=O)NCc3ncccn3)cnc(N3[C@H](CO)CCC3)n2)c1	1	543
O=C1C(CCC)C(=O)N2N1C(N(C)C)=Nc1c2cc(C)cc1	1	544
O=C(OCC1=C(C)OC(=O)O1)c1c2n(Cc3ccc(C=4C(C5=NOC(=O)N5)=CCCC=4)cc3)c(OCC)nc2ccc1	1	545
O=C(OC(OC(=O)[C@H]1C(C)(C)S[C@@H]2[C@H](NC(=O)[C@H](N)c3ccccc3)C(=O)N12)C)OCC	1	546
O=C(O)CCNC(=O)c1ccc(N=Nc2cc(C(=O)O)c(O)cc2)cc1	1	547
O=C(Oc1cc(OC(=O)N(C)C)cc(C(O)CNC(C)(C)C)c1)N(C)C	1	548
O=[N+]([O-])c1cc([C@@H]2/C(=C(\OC)/O)/C(C)=NC(C)=C2C(=O)O[C@H]2CN(Cc3ccccc3)CC2)ccc1	1	549
O(CCN1CCCCCC1)c1ccc(Cn2c(c(C)c3c2ccc(O)c3)-c2ccc(O)cc2)cc1	1	550
Clc1ccc(Cc2ccc(OC(C(=O)OCC)(CC)C)cc2)cc1	1	551
Clc1c(S(=O)(=O)N)cc2S(=O)(=O)NC(C(C)c3ccccc3)Nc2c1	1	552
O=C(OCC1=C(C)OC(=O)O1)c1n(Cc2ccc(-c3c(-c4n[nH]nn4)cccc3)cc2)c(CCC)nc1C(O)(C)C	1	553
O=C1Nc2sc3c(c2C(c2ccccc2)=NC1)CCCC3	1	554
O=C(Nc1ccc(C(=O)O)cc1)C(NC(=O)c1ccccc1)Cc1ccc(O)cc1	1	555
Clc1ccc(C(=O)NCC(=O)NO)cc1	1	556
Clc1c(N=NC(C(=O)Nc2ccccc2)C(=O)C)ccc(-c2cc(Cl)c(N=NC(C(=O)Nc3ccccc3)C(=O)C)cc2)c1	1	557
O=Cc1ccc(NCCCC)cc1	1	558
N(C(Cc1ccccc1)C)(Cc1ccccc1)C	1	559
Clc1c(S(=O)(=O)N)cc2S(=O)(=O)N=C(CSCc3ccccc3)Nc2c1	1	560
Clc1c(S(=O)(=O)N)cc2S(=O)(=O)NC(Cc3ccccc3)Nc2c1	1	561
Fc1ccc(C2=C(/C=C/[C@H](O)C[C@H](O)CC(=O)OCC)C3(Oc4c2cccc4)CCCC3)cc1	1	562
F[C@]12[C@@H](O)C[C@]3(C)[C@@](OC(=O)CC)(C(=O)COC(=O)CC)[C@@H](C)C[C@H]3[C@@H]1CCC=1[C@]2(C)C=CC(=O)C=1	1	563
P(=O)(OCC(=O)[C@@]1(O)[C@@H](C)C[C@@H]2[C@]1(C)C[C@H](O)[C@]1(F)[C@]3(C)C(=CC(=O)C=C3)CC[C@@H]21)(O)O	1	564
F[C@@]12[C@@H](O)C[C@@]3(C)[C@](OC(=O)CCCC)(C(=O)CO)[C@@H](C)C[C@H]3[C@@H]1CCC=1[C@@]2(C)C=CC(=O)C=1	1	565
Oc1c(CN(CC)CC)cc(-c2cc(CN(CC)CC)c(O)c(CC=C)c2)cc1CC=C	1	566
Clc1ccc(OC(Oc2ccc(Cl)cc2)C(=O)OCC2N(C)CCC2)cc1	1	567
O=C(NCC)CCC/C=C/C[C@@H]1[C@@H](/C=C/[C@@H](O)CCc2ccccc2)[C@H](O)C[C@@H]1O	1	568
Clc1ccc(OC(C(=O)OC(COC(=O)c2cnccc2)COC(=O)c2cnccc2)(C)C)cc1	1	569
Clc1c(OC)cc(Nc2c(C#N)cnc3c2cc(OC)c(OCCCN2CCN(C)CC2)c3)c(Cl)c1	1	570
Fc1c(-c2ccc(-c3c(C)c(C(=O)O)c4c(n3)ccc(F)c4)cc2)cccc1	1	571
Brc1cc2C(c3ncccc3)=NCC(=O)Nc2cc1	1	572
BrC(Cl)Cl	1	573
BrC(Br)Br	1	574
BrC1=C(c2ccccc2)N=C(N)NC1=O	1	575
Brc1sc2-n3c(C)nnc3CN=C(c3c(Cl)cccc3)c2c1	1	576
Clc1c(C2CCCCC2)ccc(C(=O)CCC(=O)O)c1	1	577
O=C(O)C(C(=O)N(Nc1ccccc1)c1ccccc1)CCCC	1	578
O=C(O)C(CC)c1ccc(CC(C)C)cc1	1	579
Clc1c(S(=O)(=O)N)cc2S(=O)(=O)NC(CC(C)C)Nc2c1	1	580
N(CC(CC1c2c(cccc2)CCc2c1cccc2)C)(C)C	1	581
O=C1N(C)C(=O)c2n(C)cnc2N1C	1	582
OC(CCC[C@@H](C)C1[C@]2(C)C(/C(=C\C=C\3/C(=C)CC[C@@H](O)C/3)/CCC2)CC1)(C)C	1	583
OC(CCC[C@@H](C)[C@@H]1[C@]2(C)[C@H](/C(=C\C=C\3/C(=C)[C@@H](O)C[C@H](O)C/3)/CCC2)CC1)(C)C	1	584
O=C(O)c1c(O)cc(NC(=O)c2ccccc2)cc1	1	585
O=C(O)c1c(ON)cccc1	1	586
O=C(NCCCC(=O)O)[C@H](O)C(CO)(C)C	1	587
O=C1C=C2[C@@](C)([C@@H]3C([C@@H](C)C2)[C@H]2[C@@](C)([C@](O)(C)CC2)CC3)CC1	1	588
O=C(OC(OC(=O)c1c2n(Cc3ccc(-c4c(-c5n[nH]nn5)cccc4)cc3)c(OCC)nc2ccc1)C)OC1CCCCC1	1	589
O=C(N/C=C\1/C(=O)NC(C(=O)NCC(N)C(=O)NC(CO)C(=O)NC(CNC(=O)CC(N)CCCN)C(=O)N/1)C1NC(N)=NCC1)N	1	590
O=C1NCCCCC1	1	591
ClC(Cl)(SN1C(=O)C2C(C1=O)CC=CC2)C(Cl)Cl	1	592
O=C(N[C@H](C(=O)O)CCC(=O)O)N	1	593
O(CCNCC(O)COc1c2c([nH]c3c2cccc3)ccc1)c1c(OC)cccc1	1	594
ClC1=C(C(=O)O)N2C(=O)[C@@H](NC(=O)[C@H](N)c3ccccc3)[C@H]2SC1	1	595
S(CC1=C(C(=O)O)N2C(=O)[C@@H](NC(=O)Cn3nnnc3)[C@H]2SC1)c1sc(C)nn1	1	596
O=C(N[C@@H]1C(=O)N2C(C(=O)O)=C(C=C)CS[C@H]12)/C(=N/O)/c1nc(N)sc1	1	597
O=C(OCOC(=O)C1=C(/C=C/c2c(C)ncs2)CS[C@@H]2[C@H](NC(=O)/C(=N/OC)/c3nc(N)sc3)C(=O)N12)C(C)(C)C	1	598
O=C(OCOC(=O)C1=C(C)CS[C@@H]2[C@H](NC(=O)/C(=N\OC)/c3nc(N)sc3)C(=O)N12)C(C)(C)C	1	599
O=C(N[C@@H]1C(=O)N2C(C(=O)O)=C(C=C)CS[C@H]12)/C(=N/OCC(=O)O)/c1nc(N)sc1	1	600
S(CC1=C(C(=O)O)N2C(=O)[C@@H](NC(=O)/C(=N\OC)/c3nc(N)sc3)[C@H]2SC1)c1n(C)nnn1	1	601
S(CC1=C(C(=O)O)N2C(=O)C(NC(=O)/C(=N/OC)/c3nc(N)sc3)C2SC1)c1sc(CC(=O)O)c(C)n1	1	602
O=C(N[C@@H]1C(=O)N2C(C(=O)O)=C(COC(=O)C)CS[C@H]12)/C(=N/OC)/c1nc(N)sc1	1	603
S(CC1=C(C(=O)O)N2C(=O)[C@@H](NC(=O)[C@H](NC(=O)C=3C(=O)C=C(C)NC=3)c3ccc(O)cc3)[C@H]2SC1)c1n(C)nnn1	1	604
O=C(N[C@@H]1C(=O)N2C(C(=O)O)=C(COC)CS[C@H]12)/C(=N/OC)/c1nc(N)sc1	1	605
O=C(N[C@@H]1C(=O)N2C(C(=O)O)=CCS[C@H]12)/C(=C\CC(=O)O)/c1nc(N)sc1	1	606
O=C(N[C@@H]1C(=O)N2C(C(=O)O)=CCS[C@H]12)/C(=N/OC)/c1nc(N)sc1	1	607
O=C(N[C@@H]1C(=O)N2C(C(=O)O)=C(/C=C\3/C(=O)N([C@H]4CN(C(=O)OCC5=C(C)OC(=O)O5)CC4)CC/3)CS[C@H]12)/C(=N/O)/c1nc(N)sn1	1	608
O=C(OCC1=C(C(=O)O)N2C(=O)[C@@H](NC(=O)/C(=N\OC)/c3occc3)[C@H]2SC1)N	1	609
O=C(N[C@@H]1C(=O)N2C(C(=O)O)=C(C)CS[C@H]12)[C@H](N)c1ccccc1	1	610
ClC(Cl)(Cl)C(O)O	1	611
Clc1ccc(SCc2ccc(Cl)cc2)cc1	1	612
ClC1(Cl)C2(Cl)C3(Cl)C4(Cl)C(=O)C5(Cl)C3(Cl)C1(Cl)C5(Cl)C24Cl	1	613
Clc1cc2C(=[N+]([O-])CC(NC)=Nc2cc1)c1ccccc1	1	614
ClCc1ccccc1	1	615
Clc1ccc(CC(OCCN(C)C)(C)c2ccccc2)cc1	1	616
Clc1cc2/C(=C/CCN(C)C)/c3c(Sc2cc1)cccc3	1	617
Clc1ccc(C(=O)c2ccc(OC(C(=O)NCCS(=O)(=O)O)(C)C)cc2)cc1	1	618
O=C(O)CC[C@@H](C)[C@@H]1[C@@]2(C)[C@@H](O)C[C@@H]3[C@]4(C)[C@H](C[C@@H](O)[C@H]3[C@@H]2CC1)C[C@H](O)CC4	1	619
Clc1ccc(C(=O)c2ccc(OC(C(=O)O)(C)C)cc2)cc1	1	620
P(=O)(O)(O)CO[C@H](CO)CN1C(=O)N=C(N)C=C1	1	621
O=[N+]([O-])c1cc(C2/C(=C(\OCCOC)/O)/C(C)=NC(C)=C2C(=O)OC/C=C/c2ccccc2)ccc1	1	622
O=C(O)Cc1c(C)n(C(=O)/C=C/c2ccccc2)c2c1cc(OC)cc2	1	623
O=C(OC1=C(C(=O)Nc2ncccc2)N(C)S(=O)(=O)c2c1cccc2)/C=C/c1ccccc1	1	624
Clc1c(Cl)cccc1[C@H]1/C(=C(/OCOC(=O)CCC)\O)/C(C)=NC(C)=C1C(=O)OC	1	625
Cl[C@H]([C@@H](NC(=O)[C@H]1N(C)C[C@H](CCC)C1)C1[C@H](O)[C@H](O)[C@@H](OP(=O)(O)O)[C@@H](SC)O1)C	1	626
O=C(O)C(Oc1ccc(C2(c3ccc(OC(C(=O)O)(CC)C)cc3)CCCCC2)cc1)(CC)C	1	627
Clc1ccc(-c2ccc(COC(C(=O)O)(C)C)cc2)cc1	1	628
Clc1ccc(Nc2c(/N=C(\C)/C)cc3N(c4ccc(Cl)cc4)c4c(Nc3c2)cccc4)cc1	1	629
ClCCc1c(C)ncs1	1	630
Cl/C(=C(\c1ccc(OCCN(CC)CC)cc1)/c1ccccc1)/c1ccccc1	1	631
Clc1cc2C(c3ccccc3)=NC(C(=O)O)C(O)(O)Nc2cc1	1	632
Clc1cc2C(c3ccccc3)=NC(C(=O)O)C(=O)Nc2cc1	1	633
Clc1ccc(/C(=N/OCCN)/CCCCOC)cc1	1	634
O=C(Nc1ccc(C(=O)N2c3c(-c4[nH]c(C)nc4CC2)cccc3)cc1)c1c(-c2ccccc2)cccc1	1	635
O(C)c1c2O[C@H]3C(=O)C[C@H](CC)C4[C@@H]5N(CC6CC6)CC[C@]34c2c(cc1)C5	1	636
Oc1ccc(C)cc1	1	637
O=C(O[C@@H]1C[C@H](C)CC(C)(C)C1)[C@H]1NC(=O)CC1	1	638
O=C(O)C=1Oc2c(c(OCC(O)COc3c4C(=O)C=C(C(=O)O)Oc4ccc3)ccc2)C(=O)C=1	1	639
Clc1c(S(=O)(=O)N)cc2S(=O)(=O)NC(CC3CCCC3)Nc2c1	1	640
C1CC1	1	641
Nc1ccncc1	1	642
Fc1c(C)cc(C2=C(/C=C/[C@H]3OC(=O)C[C@H](O)C3)C(C)(C)CC(C)(C)C2)cc1	1	643
O=C1N([C@@H]2O[C@H](CO)[C@@H](O)C2)C=NC(N)=N1	1	644
O=C(OCC)C(NC(C(=O)N(CC(=O)O)C1Cc2c(cccc2)C1)C)CCc1ccccc1	1	645
Clc1c2[C@@H](O)[C@@H]3C(C(=O)[C@]4(O)C(O)=C(C(=O)N)C(=O)[C@@H](N(C)C)[C@@H]4C3)=C(O)c2c(O)cc1	1	646
O=C(N[C@@H]1[C@@H](O[C@H]2[C@H](O)[C@@H](O)[C@H](OC)[C@H](C(=O)O)O2)[C@@H](O)[C@@H](CO)O[C@H]1OC)C	1	647
F[C@]12[C@@H](O)C[C@]3(C)[C@@](O)(C(=O)COC(=O)C)[C@H](C)C[C@H]3[C@@H]1CCC=1[C@]2(C)C=CC(=O)C=1	1	648
O=C(O)[C@@H](C)c1ccc(N2C(=O)c3c(cccc3)C2)cc1	1	649
[C@@H](C)(c1c(C)c(C)ccc1)c1nc[nH]c1	1	650
OC[C@@H]1[C@@H](O)[C@H](O)[C@@H](O)C(O)O1	1	651
Clc1cc2C(c3ccccc3)=NCC(=O)N(C)c2cc1	1	652
O=C(OCC)NC=1C(=O)C(N2CC2)=C(NC(=O)OCC)C(=O)C=1N1CC1	1	653
Clc1cc2S(=O)(=O)N=C(C)Nc2cc1	1	654
Clc1cc(Cc2c(O)ccc(Cl)c2)c(O)cc1	1	655
Oc1ccc(/C(/C(=C/C)/c2ccc(O)cc2)=C/C)cc1	1	656
Oc1ccc(/C(=C(\CC)/c2ccc(O)cc2)/CC)cc1	1	657
O=C1N2N(C(=O)c3c(cccc3)C2)Cc2c1cccc2	1	658
O=C(O[C@@H]1[C@H](c2ccc(OC)cc2)Sc2c(N(CCN(C)C)C1=O)cccc2)C	1	659
N(CCCN1c2c(C(C)(C)c3c1cccc3)cccc2)(C)C	1	660
O=C(O)/C(=C(/C(=O)O)\C)/C	1	661
O1CCOCC1	1	662
O=C(C(c1ccccc1)c1ccccc1)C1C(=O)c2c(C1=O)cccc2	1	663
O=C(Nc1ncccc1)Cc1ccc(-c2ccccc2)cc1	1	664
S(c1ccccc1)c1ccccc1	1	665
O(C(c1ccccc1)c1ccccc1)C1CCN(C)CC1	1	666
Clc1c(OCCOS(=O)(=O)O)ccc(Cl)c1	1	667
S(=O)(=O)(O)C(C(=O)OCC(CCCC)CC)CC(=O)OCC(CCCC)CC	1	668
Clc1cc2NC(=O)N(C3CCN(CCCN4C(=O)Nc5c4cccc5)CC3)c2cc1	1	669
O(C)c1c(OC)cc2c(C(=O)C(CC3CCN(Cc4ccccc4)CC3)C2)c1	1	670
N(CC/C=C/1\c2c(SCc3c\1cccc3)cccc2)(C)C	1	671
O=C(N)C=1C(=O)[C@@H](N(C)C)[C@@H]2[C@@H](O)[C@@H]3[C@@H](C)c4c(c(O)ccc4)C(=O)C3=C(O)[C@]2(O)C=1O	1	672
O(CCN(C)C)c1ccc(/C(=C(\CC)/c2ccccc2)/c2cc(O)ccc2)cc1	1	673
Clc1ccc(OC(=O)C(Oc2ccc(Cl)cc2)(C)C)cc1	1	674
O=C(O)C(C)(C)c1ccc(C(=O)CCCN2CCC(OC(c3ccccc3)c3ccccc3)CC2)cc1	1	675
O=C(O)C(NC(=O)c1ccc(C(CC)Cc2nc3c(N)nc(N)nc3nc2)cc1)CCC(=O)O	1	676
O=C(O)c1cc(-c2c(O)c(N=NC=3C(=O)N(c4cc(C)c(C)cc4)NC=3C)ccc2)ccc1	1	677
Fc1c(N2CCNCC2)nc2N(CC)C=C(C(=O)O)C(=O)c2c1	1	678
O=C1NC(N)=Nc2n([C@@H]3C(=C)[C@H](CO)[C@@H](O)C3)cnc12	1	679
S=C1N(c2cc(C(F)(F)F)c(C#N)cc2)C(=O)C(C)(C)N1c1cc(F)c(C(=O)NC)cc1	1	680
NC=1N2c3c(cccc3)Cc3c(cccc3)C2CN=1	1	681
Clc1c(S(=O)(=O)N)cc2S(=O)(=O)NC(CSCC(F)(F)F)Nc2c1	1	682
O=C(NC1(C(C)C)C(=O)N2C(O)(O1)C1N(C(=O)C2C(CC)(C)C)CCC1)C1CN(C)C2C(c3c4c([nH]cc4C2)ccc3)C1	1	683
O(C)[C@H]1[C@@H](C[C@H](O)CN)O[C@@H]2[C@@H]1CC(=O)C[C@@H]1O[C@@H]3[C@@H]4O[C@@]5(O[C@@H]6[C@H](O[C@H]3CC1)[C@H]4O[C@@H]6C5)CC[C@@H]1O[C@H](C(=C)C1)CC[C@@H]1O[C@@H](C(=C)[C@H](C)C1)C2	1	684
O=C(O[C@@H]1c2c(N(C(=O)N)c3c(cccc3)C1)cccc2)C	1	685
O=C(Oc1cc2c([C@@H]3[C@H]([C@H]4[C@@](C)([C@@H](O)CC4)CC3)CC2)cc1)C	1	686
O=C(O[C@@H]1[C@]2(C)[C@H]([C@H]3[C@@H](c4c(cc(O)cc4)CC3)CC2)CC1)CCC1CCCC1	1	687
ClCCN(C(=O)Oc1cc2c([C@@H]3[C@H]([C@H]4[C@@](C)([C@@H](OP(=O)(O)O)CC4)CC3)CC2)cc1)CCCl	1	688
Clc1cnc(N2C(=O)c3nccnc3C2OC(=O)N2CCN(C)CC2)cc1	1	689
O=[N+]([O-])c1n(CC(=O)NCCO)ccn1	1	690
BrCC	1	691
ClCCO	1	692
BrCCBr	1	693
N1CC1	1	694
P(=O)(O)(O)C(P(=O)(O)O)(O)C	1	695
FC(F)(F)c1cc(Nc2c(C(=O)OCCOCCO)cccc2)ccc1	1	696
Clc1ccc(OC(C(=O)OCCOC(=O)c2cnccc2)(C)C)cc1	1	697
O=C(OCC)c1n([C@H](C)c2ccccc2)cnc1	1	698
P(=O)(Oc1c(OC)cc(C2c3c(C(OC4C(O)C(O)C5OC(C)OCC5O4)C4C2C(=O)OC4)cc2OCOc2c3)cc1OC)(O)O	1	699
Fc1c(C)c2c3c(nc4c(c3[C@@H](N)CC2)CN2C(=O)C3=C([C@](CC)(C)C(=O)OC3)C=C42)c1	1	700
S(=O)(=O)(C)c1ccc(/C=C\2/C(C)=C(CC(=O)O)c3c/2ccc(F)c3)cc1	1	701
O=C(O)c1c(C)nc(-c2cc(C#N)c(OCC(C)C)cc2)s1	1	702
Clc1c(Cl)cccc1C1/C(=C(/OCC)\O)/C(C)=NC(C)=C1C(=O)OC	1	703
O=C(O)CCC(=O)c1ccc(-c2ccccc2)cc1	1	704
Clc1ccc(C(O)c2ccc(OC(C(=O)O)(C)C)cc2)cc1	1	705
Clc1ccc(-c2c(CC(=O)O)sc(-c3ccccc3)n2)cc1	1	706
O=C1N(N(c2ccccc2)C(=O)C1C/C=C(\C)/C)c1ccccc1	1	707
Fc1cc2[C@]3(C(=O)NC(=O)N3)C[C@@H](C(=O)N)Oc2cc1	1	708
FCCN1c2c(F)c(N3CCN(C)CC3)c(F)cc2C(=O)C(C(=O)O)=C1	1	709
[SH0](=O)(C)C=1C(=O)c2c(N(C)C=1)cc(F)cc2	1	710
Fc1ccc(C(=O)c2cc3nc(NC(=O)OC)[nH]c3cc2)cc1	1	711
Clc1c(-c2c(C(=O)N[C@@H]3C(=O)N4[C@@H](C(=O)O)C(C)(C)S[C@H]34)c(C)on2)c(F)ccc1	1	712
FC(F)(F)c1cc(Nc2c(C(=O)O)cccc2)ccc1	1	713
Fc1cc2C(=O)C(C(=O)O)=CN3C(C)CCc(c23)c1	1	714
Fc1c(C2=NCC(=O)N(C)c3c2cc([N+](=O)[O-])cc3)cccc1	1	715
O=C(O)c1c(C=2c3c(OC=4C=2C=CC(=O)C=4)cc(O)cc3)cccc1	1	716
FC(F)(F)c1cc2N(CCCN3CCN(CCOC(=O)CCCCCCCCC)CC3)c3c(Sc2cc1)cccc3	1	717
FC(F)(F)c1cc2N(CCCN3CCN(CCOC(=O)CCCCCC)CC3)c3c(Sc2cc1)cccc3	1	718
F[C@@H]1C=2[C@@](C)([C@H]3[C@@H](O)C[C@]4(C)[C@@](O)(C(=O)CO)CC[C@H]4[C@@H]3C1)C=CC(=O)C=2	1	719
Fc1ccc(C2=NC(=O)N(C(C)C)c3c2ccc(C)c3)cc1	1	720
S(C(=O)[C@@]1(OC(=O)CC)[C@H](C)C[C@@H]2[C@]1(C)C[C@H](O)[C@]1(F)[C@]3(C)C([C@@H](F)C[C@@H]21)=CC(=O)C=C3)CF	1	721
Cc1c[nH]nc1	1	722
P(=O)(O)(O)N1C(=O)NC(CN2[C@H]([C@@H](O[C@H](C)c3cc(C(F)(F)F)cc(C(F)(F)F)c3)OCC2)c2ccc(F)cc2)=N1	1	723
P(=O)(O)(O)[C@@H]1[C@H](C)O1	1	724
O=C(N)c1cc2c([nH]c3c2C[C@H](NC)CC3)cc1	1	725
O=C(O)/C(/CC/C=C(\C)/C)=C/1\[C@@H](OC(=O)C)C[C@]2(C)[C@]3(C)[C@@H]([C@H](O)C[C@@H]\12)[C@]1(C)[C@H]([C@H](C)[C@H](O)CC1)CC3	1	726
O=C(O)CC1(CN)CCCCC1	1	727
O=C(O)CN(CC(=O)NC)CCN(CC(=O)O)CCN(CC(=O)O)CC(=O)NC	1	728
P(=O)(OC[C@H](N(CC(=O)O)CC(=O)O)CN(CC(=O)O)CCN(CC(=O)O)CC(=O)O)(OC1CCC(c2ccccc2)(c2ccccc2)CC1)O	1	729
O=C(O)CN(CC(=O)O)CCN(CC(=O)O)CCN(CC(=O)O)CC(=O)O	1	730
O=C(O)CN(CC(=O)NCCOC)CCN(CC(=O)O)CCN(CC(=O)O)CC(=O)NCCOC	1	731
O=C(O)CN(C(CN(CC(=O)O)CCN(CC(=O)O)CC(=O)O)Cc1ccc(OCC)cc1)CC(=O)O	1	732
Fc1c(N2CC(C)NCC2)c(OC)c2N(C3CC3)C=C(C(=O)O)C(=O)c2c1	1	733
FC1(F)[C@H](O)[C@@H](CO)O[C@H]1N1C(=O)N=C(N)C=C1	1	734
Fc1c(N2C/C(=N\OC)/C(CN)C2)nc2N(C3CC3)C=C(C(=O)O)C(=O)c2c1	1	735
Fc1ccc(-c2c(/C=C/C3OC(=O)CC(O)C3)c(C(C)C)nc(-c3ccccc3)c2)cc1	1	736
S(=O)(=O)(NC(=O)NC1CCC(C)CC1)c1ccc(CCNC(=O)n2c(O)c(CC)c(C)c2)cc1	1	737
S(=O)(=O)(NC(=O)NC1CCCCC1)c1ccc(CCNC(=O)c2ncc(C)nc2)cc1	1	738
Clc1ccc(C(=O)n2c(C)c(CC(=O)NC(C=O)C(O)C(O)C(O)CO)c3c2ccc(OC)c3)cc1	1	739
N=C(N)N	1	740
Clc1c2c(c3c(c(C(O)CCN(CCCC)CCCC)c2)ccc(C(F)(F)F)c3)cc(Cl)c1	1	741
Clc1ccc(C2(O)CCN(CCCC(=O)c3ccc(F)cc3)CC2)cc1	1	742
Clc1ccc(C2(OC(=O)CCCCCCCCC)CCN(CCCC(=O)c3ccc(F)cc3)CC2)cc1	1	743
O=C(O)CCc1c(C)[cH0]=2[nH][cH0]1=CC=1C(CCC(=O)O)=C(C)C(N=1)=CC=1C(C)=C(C=C)C(N=1)=Cc1c(C)c(C=C)c([nH]1)C=2	1	744
ClC1(Cl)C2(Cl)C(Cl)=C(Cl)C1(Cl)C1C2C(Cl)C=C1	1	745
O=C(O)[C@H]1C(C)(C)S[C@@H]2[C@H](N3C(=O)[C@@H](c4ccccc4)NC3(C)C)C(=O)N12	1	746
O(C)c1c2O[C@H]3C(=O)CC[C@H]4[C@@H]5N(C)CC[C@]34c2c(cc1)C5	1	747
O=C(OCC(=O)[C@]1(O)[C@]2(C)[C@H]([C@H]3C([C@@H](O)C2)[C@]2(C)C(=CC(=O)CC2)CC3)CC1)C	1	748
O=C(O[C@]1(C(=O)CO)[C@@]2(C)[C@H]([C@H]3[C@H]([C@@H](O)C2)[C@@]2(C)C(=CC(=O)CC2)CC3)CC1)CCC	1	749
O=C(OCC(=O)[C@]1(O)[C@]2(C)[C@H]([C@H]3C([C@@H](O)C2)[C@]2(C)C(=CC(=O)CC2)CC3)CC1)CCC1CCCC1	1	750
O=C(O[C@@]1(C(=O)COC(=O)CC)[C@]2(C)[C@H]([C@H]3[C@H]([C@@H](O)C2)[C@]2(C)C(=CC(=O)CC2)CC3)CC1)CCC	1	751
P(=O)(OCC(=O)[C@]1(O)[C@]2(C)[C@H]([C@H]3[C@H]([C@@H](O)C2)[C@]2(C)C(=CC(=O)CC2)CC3)CC1)(O)O	1	752
O=C(OCC(=O)[C@]1(O)[C@]2(C)[C@H]([C@H]3C([C@@H](O)C2)[C@]2(C)C(=CC(=O)CC2)CC3)CC1)CCC(=O)O	1	753
O=C(O[C@@]1(C(=O)CO)[C@]2(C)[C@H]([C@H]3[C@H]([C@@H](O)C2)[C@]2(C)C(=CC(=O)CC2)CC3)CC1)CCCC	1	754
O(C)c1cc2c(C(O)C3N4CC(CC)C(C3)CC4)ccnc2cc1	1	755
O=C(NO)C(C)c1ccc(CC(C)C)cc1	1	756
Fc1cc2onc(C3CCN(CCCOc4c(OC)cc(C(=O)C)cc4)CC3)c2cc1	1	757
S(CC/N=C/N)C1=C(C(=O)O)N2C(=O)C(C(O)C)C2C1	1	758
[O-][N+](CCCN1c2c(cccc2)CCc2c1cccc2)(C)C	1	759
Fc1cc2C3(C(=O)NC(=O)N3)c3c(-c2cc1)ccc(F)c3	1	760
O=C1C(N)=CC(c2ccncc2)=CN1	1	761
O=C1Nc2c(O)ccc([C@@H](O)CNC3Cc4c(cc(CC)c(CC)c4)C3)c2C=C1	1	762
c12c(cccc1)CC=C2	1	763
IC(I)I	1	764
N(CCCn1c2c(c3c1CCCCCC3)cccc2)(C)C	1	765
O=C(Oc1cc2c(CC)c3c(nc2cc1)C=1N(C(=O)C2=C([C@](O)(CC)C(=O)OC2)C=1)C3)N1CCC(N2CCCCC2)CC1	1	766
O=C(O)/C=C(/C=C/C=C(/C=C/C=1C(C)(C)CCCC=1C)\C)\C	1	767
O=C(OC(C)C)c1c(c(C(=O)OC)c(C)nc1C)-c1c2NONc2ccc1	1	768
O=C(O)/C=C\1/c2c(C(OC)=Cc3c/1cccc3)scc2	1	769
O=C(CCC1C(=O)N(N(c2ccccc2)C1=O)c1ccccc1)C	1	770
O=C(O)C(C)c1cc(C(=O)c2ccccc2)ccc1	1	771
O=C(OC(C)(C)C)/C=C/c1c(C2/C(=C(\OCC)/O)/C(C)=NC(C)=C2C(=O)OCC)cccc1	1	772
O=C(NCc1ccccc1)[C@H](NC(=O)C)COC	1	773
O([C@H]1[C@H](O)[C@@](O)(CO)O[C@@H]1CO)[C@H]1[C@H](O)[C@@H](O)[C@@H](O)[C@@H](CO)O1	1	774
O(CCN1CCCC1)c1ccc([C@H]2[C@@H](c3ccccc3)CCc3c2ccc(O)c3)cc1	1	775
Clc1cnc(C(=O)NCCN)cc1	1	776
O=[N+]([O-])c1cc(C2/C(=C(\OC)/O)/C(C)=NC(C)=C2C(OC(CN(CCC(c2ccccc2)c2ccccc2)C)(C)C)=O)ccc1	1	777
Clc1cc(C(n2cncc2)c2cc3nc[nH]c3cc2)ccc1	1	778
Fc1ccc(C(CCCN2CCN(CC(=O)Nc3c(C)cccc3C)CC2)c2ccc(F)cc2)cc1	1	779
Fc1c(F)cc(F)c2sc(Cc3c4c(n(CC(=O)O)c3)cccc4)nc12	1	780
Clc1ccc(OC(Oc2ccc(Cl)cc2)C(=O)OC2CCN(C)CC2)cc1	1	781
O=C(N[C@H](Cc1ccccc1)C)[C@@H](N)CCCCN	1	782
Clc1ccc(-c2c(CC(=O)O)cn(-c3ccccc3)n2)cc1	1	783
Clc1c(Cn2nc(C(=O)O)c3c2cccc3)ccc(Cl)c1	1	784
Clc1cc2c(/C(=C/3\CCN(C(=O)OCC)CC\3)/c3ncccc3CC2)cc1	1	785
FC(F)(CCCC)C1(O)OC2C(C(CCCCCCC(=O)O)C(=O)C2)CC1	1	786
O=C1N(C[C@H]2[C@H](CN3CCN(c4nsc5c4cccc5)CC3)CCCC2)C(=O)C2[C@H]3C[C@@H](C12)CC3	1	787
O=[N+]([O-])c1cc(C2/C(=C(/OC)\O)/C(C)=NC(C)=C2C(=O)OCCN2CCN(C(c3ccccc3)c3ccccc3)CC2)ccc1	1	788
C(n1c2c(c3c1CCN(C)C3)cccc2)c1ccccc1	1	789
Clc1c(S(=O)(=O)N)cc2S(=O)(=O)NC(C(C(CC)C)C)Nc2c1	1	790
Clc1c2C(=C)[C@H]3[C@H](O)[C@H]4[C@H](N(C)C)C(=O)C(C(=O)N)=C(O)[C@@]4(O)C(=O)C3=C(O)c2c(O)cc1	1	791
O=C(C)C1(O)C2(C)C(C3C(C4(C)C(C(C)C3)=CC(=O)CC4)CC2)CC1	1	792
FC(F)(F)c1nc2c(C(F)(F)F)cccc2c([C@H](O)C2NCCCC2)c1	1	793
O=C(O[C@@]1(C(=O)C)[C@]2(C)[C@H]([C@H]3[C@@H]([C@]4(C)C(C(C)=C3)=CC(=O)CC4)CC2)CC1)C	1	794
O[C@@H]([C@H](O)[C@@H](O)CNC)[C@H](O)CO	1	795
N(CC/C=C/1\c2c(C(C)(C)c3c\1cccc3)cccc2)(C)C	1	796
P(=O)(Oc1c(C)cc(OP(=O)(O)O)c2c1cccc2)(O)O	1	797
O=C(OCC(COC(=O)N)(CCC)C)N	1	798
[SH0](=O)(C)c1cc2N(CCC3N(C)CCCC3)c3c(Sc2cc1)cccc3	1	799
O=[N+]([O-])c1cc(N)ccc1	1	800
O=C(OCc1ccccc1)NCC1CN(C)C2C(c3c4c(n(C)cc4C2)ccc3)C1	1	801
N(\C(N(C)C)=N)=C(\N)/N	1	802
O=C(C(CC(N(C)C)C)(c1ccccc1)c1ccccc1)CC	1	803
O=C1C=C2[C@@](C)([C@@H]3[C@H]([C@H]4[C@@](C)([C@](O)(C)CC4)CC3)CC2)C=C1	1	804
C(N1c2c(Sc3c1cccc3)cccc2)C1CN(C)CC1	1	805
O=C(OC1C2(C)C(C3C(C4(C)C(C)=CC(=O)CC4CC3)CC2)CC1)C	1	806
S(/C(=N/OC(=O)NC)/C)C	1	807
O(C)c1c2occc2cc2c1OC(=O)C=C2	1	808
ClC(Cl)(Cl)C(c1ccc(OC)cc1)c1ccc(OC)cc1	1	809
O(C(C)(C)C)C	1	810
N(C)c1ccccc1	1	811
O=C(OCC(=O)C1(O)C2(C)C(C3C(C4(C)C(C(C)C3)=CC(=O)C=C4)C(O)C2)CC1)C	1	812
O=C(OCC(=O)[C@]1(O)[C@]2(C)[C@H]([C@H]3C([C@@H](O)C2)[C@]2(C)C([C@@H](C)C3)=CC(=O)C=C2)CC1)CCC(=O)O	1	813
S(=O)(=O)(N)c1c(C)cc2c(S(=O)(=O)CCC2)c1	1	814
O=C(O[C@@H]1C2[C@@H](CC[C@H]3OC(=O)C[C@H](O)C3)[C@@H](C)C=C[C@H]2C[C@H](C)C1)[C@H](CC)C	1	815
O=C(N(CC)CC)[C@@]1([C@H](CN)C1)c1sccc1	1	816
Brc1cc(F)c(CN2C(=O)C3(C(=O)NC(=O)C3)c3c(C2=O)ccc(F)c3)cc1	1	817
O=C(N)C=1C(=O)[C@@H](N(C)C)[C@H]2[C@@](O)(C=1O)C(=O)C1=C(O)c3c(O)ccc(N(C)C)c3C[C@H]1C2	1	818
O=C(Nc1ccc(CCNC[C@H](O)c2ccccc2)cc1)Cc1nc(N)sc1	1	819
N(\N=C(\C=N\N=C(/N)\N)/C)=C(\N)/N	1	820
BrCC(O)C(O)C(O)C(O)CBr	1	821
OCCNC/C=N/c1c2c(O)c3c(O)ccc(O)c3c(O)c2c(NCCNCCO)cc1	1	822
[SH0](=O)(C(c1ccccc1)c1ccccc1)CC(=O)N	1	823
O=C1N(c2ccccc2)NC(=O)C1CCCC	1	824
O=C(OCC(O)CO)CCCCCCC	1	825
O=C(O)/C(=C/C(=O)O)/CC	1	826
O[C@@H]1[C@@H]2Oc3c(O)ccc4c3[C@@]32[C@H]([C@H](N(C)CC3)C4)C=C1	1	827
Clc1c(NC2=NCCN2)c(OC)nc(C)n1	1	828
O=C(N(C)C)C	1	829
O=C(O[C@@H]1[C@]2(C)[C@H]([C@H]3[C@@H]([C@@H]4C(=CC(=O)CC4)CC3)CC2)CC1)CCCCCCCCC	1	830
O=C1C=C2[C@@H]([C@@H]3[C@H]([C@H]4[C@@](C)([C@@H](O)CC4)CC3)CC2)CC1	1	831
O=C(N)c1cnccc1	1	832
O=C(NCc1ccccc1)CCNNC(=O)c1ccncc1	1	833
O=[N+]([O-])c1cc(C2/C(=C(\OC)/O)/C(C)=NC(C)=C2C(=O)OCCN(Cc2ccccc2)C)ccc1	1	834
Clc1cc([N+](=O)[O-])c(O)c(-c2c(O)c([N+](=O)[O-])cc(Cl)c2)c1	1	835
Clc1c(NC(=O)c2c(O)ccc(Cl)c2)ccc([N+](=O)[O-])c1	1	836
Clc1ccc(OC(C(=O)OCc2cnccc2)(C)C)cc1	1	837
O=[N+]([O-])c1c(C2/C(=C(\OC)/O)/C(C)=NC(C)=C2C(=O)OC)cccc1	1	838
FC(F)(F)c1cc(Nc2c(C(=O)O)cccn2)ccc1	1	839
O=[N+]([O-])c1cc(C2/C(=C(/OC(C)C)\O)/C(C)=NC(C#N)=C2C(=O)OC)ccc1	1	840
O=[N+]([O-])c1cc(C2/C(=C(/OCCOC)\O)/C(C)=NC(C)=C2C(=O)OC(C)C)ccc1	1	841
S(CCN/C(/NCc1cc2OCOc2cc1)=C\[N+](=O)[O-])Cc1oc(CN(C)C)cc1	1	842
O=[N+]([O-])c1c(C2/C(=C(/OC)\O)/C(C)=NC(C)=C2C(=O)OCC(C)C)cccc1	1	843
FC(F)(F)c1cc([N+](=O)[O-])c(C(=O)C2C(=O)CCCC2=O)cc1	1	844
O=[N+]([O-])N(C)c1c([N+](=O)[O-])cc([N+](=O)[O-])cc1[N+](=O)[O-]	1	845
O=[N+]([O-])c1cc(C2/C(=C(/OCC)\O)/C(C)=NC(C)=C2C(=O)OC)ccc1	1	846
S(c1c(C)ccc2N=C(N)NC(=O)c12)c1ccncc1	1	847
Fc1ccc(Cn2c(NC3CCNCC3)nc3c2cccc3)cc1	1	848
O=C(O[C@H]1[C@@H](O)[C@H](Oc2c(C)c3OC(=O)C(NC(=O)c4cc(C/C=C(\C)/C)c(O)cc4)=C(O)c3cc2)OC(C)(C)[C@@H]1OC)N	1	849
O(/N=C/1\c2c(cccc2)CCc2c\1cccc2)CCN(C)C	1	850
O=C(OCC)CC/C=C\C/C=C\C/C=C\C/C=C\C/C=C\C/C=C\CC	1	851
O=C1C(Cn2c(C)ncc2)CCc2n(C)c3c(c12)cccc3	1	852
Clc1c(Cl)cccc1	1	853
Clc1ccc(C(=O)n2c(C)c(CC(=O)NO)c3c2ccc(OC)c3)cc1	1	854
Clc1cc2C(c3ccccc3)=NC(O)C(=O)Nc2cc1	1	855
O=CC1=C(O)C[C@H]2[C@](C)([C@@H]3[C@H]([C@H]4[C@](C)([C@@](O)(C)CC4)CC3)CC2)C1	1	856
O=C1N(N(c2ccccc2)C(=O)C1CCCC)c1ccc(O)cc1	1	857
O=C(N)C=1C(=O)[C@@H](N(C)C)[C@@H]2[C@@H](O)[C@@H]3[C@@](O)(C)c4c(c(O)ccc4)C(=O)C3=C(O)[C@]2(O)C=1O	1	858
P(=O)(O)(O)C(P(=O)(O)O)(O)CCN	1	859
Clc1c(S(=O)(=O)N)cc2S(=O)(=O)NC(Cc3ccc(F)cc3)Nc2c1	1	860
O=C1N(C)C(=O)OC1(CC)C	1	861
F[C@@H]1C=2[C@@](C)([C@H]3[C@@H](O)C[C@]4(C)[C@@](O)(C(=O)COC(=O)C)[C@H](C)C[C@H]4[C@@H]3C1)C=CC(=O)C=2	1	862
OC([C@H](/C=C/[C@@H](C)[C@@H]1[C@]2(C)[C@H](/C(=C\C=C\3/C[C@@H](O)C[C@H](O)C/3)/CCC2)CC1)C)(C)C	1	863
N(=Nc1ccccc1)c1ccc(N(C)C)cc1	1	864
O=C(/C=C/C=C/C(=C/[C@H](O)CCCC)/C)N1C(=O)CCC1	1	865
Oc1c(-c2ccccc2)oc(N)n1	1	866
S(=O)(=O)(N)c1c(C(F)(F)F)cc2NC(CCCCC)NS(=O)(=O)c2c1	1	867
ClC(Cl)(Cl)C(Cl)Cl	1	868
O=C1C(C(CCC)C)(CC)C(=O)NC(=O)N1	1	869
OC[C@@H]1[C@@H](O)C[C@H](n2c3NC=NC[C@@H](O)c3nc2)O1	1	870
O=C1N(c2ccccc2)C=C(c2ncccc2)C=C1c1c(C#N)cccc1	1	871
S(C[C@H]1CN(CCC)[C@H]2[C@@H](c3c4c([nH]cc4C2)ccc3)C1)C	1	872
Clc1cc2N(CCCN3CCN(CCO)CC3)c3c(Sc2cc1)cccc3	1	873
N(N)CCc1ccccc1	1	874
O=C1C(c2ccccc2)C(=O)c2c1cccc2	1	875
O(CC(NN)C)c1ccccc1	1	876
O=C1C(C(CC)c2ccccc2)=C(O)Oc2c1cccc2	1	877
S(=O)(=O)(Nc1sccn1)c1ccc(NC(=O)c2c(C(=O)O)cccc2)cc1	1	878
Oc1c(/C=C/C(=C/CC[C@@H](CCC[C@@H](CCCC(C)C)C)C)/C)c(C)c(O)c2c1cccc2	1	879
Clc1ccc(OC(C(=O)OCCNC(=O)c2cnccc2)(C)C)cc1	1	880
O=[N+]([O-])c1c(O)c([N+](=O)[O-])cc([N+](=O)[O-])c1	1	881
O=C1N(N(c2ccccc2)C(=O)C1(CCCC)CN1CCN(C)CC1)c1ccccc1	1	882
Clc1ccc(-c2c(CC(=O)O)nn(-c3ccc(F)cc3)c2)cc1	1	883
Clc1ccc(OC(C(=O)OCc2nc(CO)ccc2)(C)C)cc1	1	884
O=C1c2c(NCCN)ccc(/N=C/CN)c2C(O)=C2C1=CNC=C2	1	885
Brc1cc(F)c(CN2C(=O)c3c(C(CC(=O)O)=N2)cccc3)cc1	1	886
Clc1cc2C(C)c3c(OC(C(=O)OCC)Oc2cc1)ccc(Cl)c3	1	887
O=C(Nc1ccc(OCC(O)CNC(C)C)cc1)C	1	888
O=C(Nc1cc2OC(c3n[nH]nn3)=CC(=O)c2cc1)c1ccc(OCCCCc2ccccc2)cc1	1	889
Fc1c(C(C(=O)C2CC2)N2Cc3c(sc(OC(=O)C)c3)CC2)cccc1	1	890
Clc1cc2C(c3ccccc3)=NCC(=O)N(CC3CC3)c2cc1	1	891
O=C(OCC(=O)[C@]1(O)[C@]2(C)[C@H]([C@H]3C([C@@H](O)C2)[C@]2(C)C(=CC(=O)C=C2)CC3)CC1)C	1	892
P(=O)(OCC(=O)[C@]1(O)[C@]2(C)[C@H]([C@H]3[C@H]([C@@H](O)C2)[C@]2(C)C(=CC(=O)C=C2)CC3)CC1)(O)O	1	893
O=C(OCC(=O)[C@]1(O)[C@]2(C)[C@H]([C@H]3[C@H]([C@@H](O)C2)[C@]2(C)C(=CC(=O)C=C2)CC3)CC1)CC(C)(C)C	1	894
N(C(Cc1ccccc1)C)CCC(c1ccccc1)c1ccccc1	1	895
Clc1ccc(/C(=N\CCCC(=O)N)/c2c(O)ccc(F)c2)cc1	1	896
ClC(CCl)C	1	897
n1ccccc1	1	898
S(SCc1c(CO)c(O)c(C)nc1)Cc1c(CO)c(O)c(C)nc1	1	899
Clc1c(S(=O)(=O)N)cc2C(=O)NC(CC)Nc2c1	1	900
Fc1ccc(CNC(=O)C2=C(O)C(=O)N(C)C(C(NC(=O)c3oc(C)nn3)(C)C)=N2)cc1	1	901
Brc1cc(F)c(CN2C(=O)[C@@]3(C(=O)NC(=O)C3)n3c(C2=O)ccc3)cc1	1	902
O=C(Nc1c(C)cccc1C)CN1CCN(CC(O)COc2c(OC)cccc2)CC1	1	903
Clc1c(C(F)(F)F)cc(NC(=O)Nc2c(F)cc(Oc3cc(C(=O)NC)ncc3)cc2)cc1	1	904
O=C(NC(Cc1ccccc1)(C)c1ccccc1)CN	1	905
O=C(OC)CCN1CCC(N(C(=O)CC)c2ccccc2)(C(=O)OC)CC1	1	906
S(CC(=O)O[C@H]1[C@]2(C)[C@H](C)CC[C@]3([C@@H](C)[C@H](O)[C@@](C=C)(C)C1)[C@H]2C(=O)CC3)C1C[C@@H]2N(C)[C@H](C1)CC2	1	907
O(CCCCC)c1c(OCC)cc(C2C(=O)NC(=O)S2)cc1	1	908
Clc1c(NC(=O)c2cc(OCC3CC3)c(OC(F)F)cc2)c(Cl)cnc1	1	909
Clc1ccc(-c2oc(COC(C(=O)O)(C)C)c(C)n2)cc1	1	910
SCC/C=C/[C@H]1OC(=O)[C@H](C(C)C)NC(=O)/C(=C/C)/NC(=O)[C@@H](CS)NC(=O)[C@@H](C(C)C)CC(=O)C1	1	911
Clc1ccc(OC(C(=O)OCCCOC(=O)c2cnccc2)(C)C)cc1	1	912
Clc1c(Cl)cc(OP(=S)(OC)OC)c(Cl)c1	1	913
Oc1[nH]c2c(c(CCN(CCC)CCC)ccc2)c1	1	914
O=C(NCCCOc1cc(CN2CCCCC2)ccc1)COC(=O)C	1	915
O=C1NC(=O)C=2c3c4c(n(c3)CCO[C@H](CN(C)C)CCn3c5c(c(c3)C1=2)cccc5)cccc4	1	916
Fc1c(Cn2nnc(C(=O)N)c2)c(F)ccc1	1	917
Clc1ccc(OC(C(=O)OCC(OC(=O)c2c(OC(=O)C)cccc2)COC(=O)C(Oc2ccc(Cl)cc2)(C)C)(C)C)cc1	1	918
Fc1c(C2(Cn3ncnc3)OC(COc3ccc(N4CCN(c5ccc(N6C(=O)N(C(CC)C)N=C6)cc5)CC4)cc3)CO2)ccc(F)c1	1	919
N([C@@H](Cc1ccccc1)C)(CC#C)C	1	920
Clc1ccc(OC(C(SCCC(NC(=O)C)C(=O)O)=O)(C)C)cc1	1	921
Clc1ccc(OC(C(=O)OCCCOC(=O)C(Oc2ccc(Cl)cc2)(C)C)(C)C)cc1	1	922
Clc1c(N2C[C@@H](N)C3(C2)CC3)c(F)cc2C(=O)C(C(=O)O)=CN([C@H]3[C@@H](F)C3)c12	1	923
Clc1ccc(OC(C(=O)O[C@@H]2CC=3[C@@](C)([C@@H]4[C@H]([C@H]5[C@@](C)([C@@H]([C@@H](CC[C@H](C(C)C)CC)C)CC5)CC4)CC=3)CC2)(C)C)cc1	1	924
O=C(O)CCCc1ccccc1	1	925
S(=O)(=O)(O[C@@H]1CC=2[C@](C)([C@@H]3[C@H]([C@H]4[C@](C)(C(=O)CC4)CC3)CC=2)CC1)O	1	926
S(=O)(=O)(OC(CC(C)C)CCC(CCCC)CC)O	1	927
Fc1cc2[C@]3(C(=O)NC(=O)N3)C[C@@H](C)Oc2cc1	1	928
O=C1[C@]2(O)O[C@@H]3[C@@H](NC)[C@@H](O)[C@@H](NC)[C@H](O)[C@H]3O[C@@H]2O[C@H](C)C1	1	929
S(C(=O)c1sccc1)C(C(=O)NCC(=O)O)C	1	930
O=C[C@]1(O)[C@@H](O[C@H]2[C@@H](NC)[C@H](O)[C@@H](O)[C@H](CO)O2)[C@H](O[C@@H]2[C@@H](O)[C@H](O)[C@@H](/N=C(\N)/N)[C@H](O)[C@H]2/N=C(\N)/N)O[C@H]1C	1	931
C(=C)c1ccccc1	1	932
Clc1nnc(NS(=O)(=O)c2ccc(N)cc2)cc1	1	933
S(=O)(=O)(Nc1sc(CC)nn1)c1ccc(N)cc1	1	934
S(=O)(=O)(Nc1nnc(OC)cc1)c1ccc(N)cc1	1	935
S(=O)(=O)(Nc1nc(C)nc(C)c1)c1ccc(N)cc1	1	936
[SH0](=O)(O)CNc1ccc(S(=O)(=O)c2ccc(NC[SH0](=O)O)cc2)cc1	1	937
S(C(C)C)c1ccc(C(O)C(NCCCCCCCC)C)cc1	1	938
O=C(OCC1(CCCC)C(=O)N(N(c2ccccc2)C1=O)c1ccccc1)CCC(=O)O	1	939
Nc1c2c(nc3c1CCCC3)cccc2	1	940
O=C(Nc1ccc(OCC(O)CNC(C)(C)C)cc1)NC1CCCCC1	1	941
FC(F)(F)c1cc(Nc2c(C(=O)OC3OC(=O)c4c3cccc4)cccn2)ccc1	1	942
Oc1cc([C@@H]([C@H](CN(C)C)C)CC)ccc1	1	943
S(=O)(=O)(O)CCNC(=O)CC[C@@H](C)[C@@H]1[C@]2(C)[C@H]([C@H]3[C@@H]([C@]4(C)[C@@H](C[C@H](O)CC4)CC3)CC2)CC1	1	944
O=C(O)[C@H]1[C@@](Cn2nncc2)(C)S(=O)(=O)[C@H]2N1C(=O)C2	1	945
ClC(Cl)(Cl)C1NS(=O)(=O)c2c(N1)cc(Cl)c(S(=O)(=O)N)c2	1	946
O(C)c1cc2c(/C=N/N/C(=N/CCCCC)/N)c[nH]c2cc1	1	947
Clc1cc2c(C(=O)c3sccc3)c(O)n(C(=O)N)c2cc1	1	948
O=C(OC1C2C(CCC(O)CC(O)CC(=O)O)C(C)C=CC2=CC(C)C1)C(CC)(C)C	1	949
P(=O)(OCOC(=O)OC(C)C)(OCOC(=O)OC(C)C)COC(Cn1c2ncnc(N)c2nc1)C	1	950
O=C(Nc1ncccc1)C=1N(C)S(=O)(=O)c2c(C=1O)scc2	1	951
FC(F)(F)c1ccc(NC(=O)/C(/C#N)=C(\O)/C)cc1	1	952
O=C(OC(OCCCCC)CN1C(=O)N(CC(OC(=O)N)COCCCC)C(=O)C(CC)(c2ccccc2)C1=O)N	1	953
O=C(N)C=1C(=O)[C@@H](N(C)C)[C@H]2[C@@](O)(C=1O)C(O)=C1C(=O)c3c(O)cccc3[C@](O)(C)[C@H]1C2	1	954
c1(-c2ncsc2)[nH]c2c(n1)cccc2	1	955
S=C(N/N=C/c1ccc(NC(=O)C)cc1)N	1	956
S=C1NC(=O)C(C(CCC)C)(CC)C(=O)N1	1	957
Sc1ccccc1	1	958
S(=O)(=O)(N(C)C)c1cc2/C(=C/CCN3CCN(C)CC3)/c3c(Sc2cc1)cccc3	1	959
Clc1ccc(OC(C(=O)OCCSCCCCCCCCCCSCCOC(=O)C(Oc2ccc(Cl)cc2)(C)C)(C)C)cc1	1	960
O=C(O)C(C)c1sc(C(=O)c2ccccc2)cc1	1	961
S(CCC)c1nc(N[C@H]2[C@H](c3cc(F)c(F)cc3)C2)c2nnn([C@H]3[C@H](O)[C@H](O)[C@@H](OCCO)C3)c2n1	1	962
O=C(O)[C@@H](C(=O)N[C@@H]1C(=O)N2[C@@H](C(=O)O)C(C)(C)S[C@H]12)c1cscc1	1	963
O=C(Nc1c(O)c2C(O)=C3C(=O)[C@]4(O)C(O)=C(C(=O)N)C(=O)[C@@H](N(C)C)[C@@H]4C[C@@H]3Cc2c(N(C)C)c1)CNC(C)(C)C	1	964
Clc1ccc(OC(C(=O)N2C(C(=O)O)CSC2)(C)C)cc1	1	965
O(C[C@@H](O)CNC(C)(C)C)c1c(N2CCOCC2)nsn1	1	966
SC(C(=O)NCC(=O)O)C	1	967
S(=O)(=O)(Nc1cc([C@@H](CC)C2=C(O)O[C@](CCC)(CCc3ccccc3)CC2=O)ccc1)c1ncc(C(F)(F)F)cc1	1	968
Clc1c(Nc2[nH]ccn2)c2NSNc2cc1	1	969
O=C(Nc1c(C)cccc1C)C(N)C	1	970
Clc1ccc(OC(C(=O)Oc2c(C)c(C)c3O[C@@](CCC[C@@H](CCC[C@@H](CCCC(C)C)C)C)(C)CCc3c2C)(C)C)cc1	1	971
Clc1c(C)c(Nc2c(C(=O)O)cccc2)ccc1	1	972
S(=O)(=O)(OC[C@]12OC(C)(C)O[C@H]1[C@@H]1OC(C)(C)O[C@@H]1CO2)N	1	973
O=C(Nc1c(C(=O)O)cccc1)/C=C/c1cc(OC)c(OC)cc1	1	974
N[C@H]1[C@H](c2ccccc2)C1	1	975
FC(F)(F)c1cc(OC[C@H](O)/C=C/[C@@H]2[C@@H](C/C=C/CCCC(=O)OC(C)C)[C@@H](O)C[C@H]2O)ccc1	1	976
F[C@]12[C@@H](O)C[C@]3(C)[C@]4(C(=O)COC(=O)CC(C)(C)C)OC(C)(C)O[C@@H]4C[C@H]3[C@@H]1CCC=1[C@]2(C)C=CC(=O)C=1	1	977
Clc1c(C2=NCc3n(c(C)nn3)-c3c2cc(Cl)cc3)cccc1	1	978
O[C@@H]1[C@]2(C)[C@H]([C@H]3[C@@H]([C@]4(C)[C@@]5(O[C@@H]5C(O)=C(C#N)C4)CC3)CC2)CC1	1	979
O=C(C(C)(C)C)CCC1C(=O)N(N(c2ccccc2)C1=O)c1ccccc1	1	980
O=C1Oc2c(C)c3oc(C)cc3cc2C(C)=C1	1	981
S=C(N1CCOCC1)c1cc(OC)c(OC)c(OC)c1	1	982
Clc1ccc(C(=O)n2c(C)c(CC(=O)OCC(C(=O)O)c3ccccc3)c3c2ccc(OC)c3)cc1	1	983
O=C(OC1CC2N(C)C(C1)CC2)c1c2c([nH]c1)cccc2	1	984
Clc1ccc(OC(Oc2ccc(Cl)cc2)C(=O)NC(=O)N)cc1	1	985
O=C(OCC)N	1	986
S(=O)(=O)(N[C@H](C(=O)N1CCN(C(=O)OCC)CC1)Cc1cc(C(=N)N)ccc1)c1c(C(C)C)cc(C(C)C)cc1C(C)C	1	987
S(=O)(=O)(N)c1ccc(-c2c(C)onc2-c2ccccc2)cc1	1	988
O=C(O)[C@@H](N(C(=O)CCCC)Cc1ccc(-c2c(-c3n[nH]nn3)cccc2)cc1)C(C)C	1	989
n1c2c(ncc1)cc1c(c2)C2CNCC1C2	1	990
O=C(CNC1C2C(CC(CO)C1)CC2)N1[C@H](C#N)CCC1	1	991
ClC(Cl)=C	1	992
O=C(OC/C=C(/C=C/C=C(/C=C/C=1C(C)(C)CCCC=1C)\C)\C)CCCCCCCCCCCCCCC	1	993
O=C(NO)CCCCCCC(=O)Nc1ccccc1	1	994
O=C(CC(c1ccccc1)C1=C(O)Oc2c(C1=O)cccc2)C	1	995
O(CCCCCC)c1c(C2=CCCN(C)C2)nsn1	1	996
O=C(OCC)CN[C@@H](C(=O)N1[C@H](C(=O)NCc2ccc(C(NO)=N)cc2)CC1)C1CCCCC1	1	997
O=C(N[C@@H]1[C@@H](NC(=N)N)C=C(C(=O)O)OC1[C@H](O)[C@H](O)CO)C	1	998
Brc1cc(F)c(CN2C(=O)N(CC(=O)O)c3c(C2=O)ccc(Cl)c3)cc1	1	999
O=C(O)Cc1c(C)n(C(=O)c2ccc(N=[N+]=[N-])cc2)c2c1cc(OC)cc2	1	1000
Brc1ccc(/C(=C\CN(C)C)/c2cnccc2)cc1	1	1001
Clc1c(CCN2CCN(c3nsc4c3cccc4)CC2)cc2c([nH]c(O)c2)c1	1	1002
FC(F)(F)c1cc2nc(CN3C(=O)c4c(C(CC(=O)O)=N3)cccc4)sc2cc1	1	1003
Fc1c(C)c2c3c(nc4c(c3[C@@H](N)CC2)CN2C(=O)C3=C([C@](O)(CC)C(=O)OC3)C=C42)c1	1	1004
Clc1c(F)ccc(Nc2ncnc3c2cc(NC(=O)/C=C/CN(C)C)c(O[C@@H]2COCC2)c3)c1	1	1005
NC1C(N)CCCC1	1	1006
FC(F)(F)COC=C	1	1007
OCC1=CCC(C(=C)C)CC1	1	1008
FC(F)(F)Oc1cc2SC(N)Nc2cc1	1	1009
O=C1[C@H](C)C[C@]2(C)[C@@H]3[C@H]([C@H]4[C@@](C)([C@](O)(C)CC4)CC3)CC[C@H]2C1	1	1010
O(C)c1c(OC)c2c(cc1OC)CCC(NC)C=1C2=CC=C(OC)C(=O)C=1	1	1011
O(CC)c1c(OCC)ccc(Cc2nccc3c2cc(OCC)c(OCC)c3)c1	1	1012
O=[N+]([O-])c1cc2n(C)cc(C3=C(c4c5c(n(C)c4)cccc5)C(=O)NC3=O)c2cc1	1	1013
O=C(OC1(C#C)C2(C)C(C3C(C4C(=CC(=O)CC4)CC3)CC2)CC1)CCCCCC	1	1014
O=C(O)CNC(C(=O)N1C(C(=O)NCc2ccc(C(=N)N)cc2)CC1)C1CCCCC1	1	1015
O=C(OCC)CNC(C(=O)N1C(C(=O)NCc2ccc(/C=N/NO)cc2)CC1)C1CCCCC1	1	1016
O=C(NC1C(O)c2c(cccc2)C1)C(CC(O)CN1C(C(=O)NC(C)(C)C)CN(Cc2cnccc2)CC1)Cc1ccccc1	1	1017
O=C(CO)[C@]1(O)C[C@H](O[C@@H]2O[C@@H](C)[C@@H](O)[C@@H](N3C[C@@H](OC)OCC3)C2)c2c(O)c3C(=O)c4c(OC)cccc4C(=O)c3c(O)c2C1	1	1018
S(C[C@H](NC(=O)COc1c2c(cncc2)ccc1)C(=O)N[C@H]([C@H](O)C(=O)N1[C@H](C(=O)NC(C)(C)C)CSC1)Cc1ccccc1)C	1	1019
ClC(Cl)(Cl)C	1	1020
O=[N+]([O-])c1c(O)ccc([N+](=O)[O-])c1	1	1021
O(CCO)CC	1	1022
O=C(O)/C=C(\C=C\C=C(\C=C\c1c(C)c(C)c(OC)cc1C)/C)/C	1	1023
S(C(=O)C)C[C@H](C(=O)N1[C@H](C(=O)N[C@H](C(=O)O)Cc2ccccc2)CCC1)C	1	1024
ClC1(Cl)[C@]2(Cl)C(Cl)=C(Cl)[C@@]1(Cl)C1[C@H]2[C@H]2C=C[C@@H]1C2	1	1025
O=C(NCC(=O)O)[C@H](CN1C[C@H](C)[C@](C)(c2cc(O)ccc2)CC1)Cc1ccccc1	1	1026
FC(F)(F)c1cc([C@H](O[C@H]2[C@H](N(CC3=NNC(=O)N3)CCO2)c2ccc(F)cc2)C)cc(C(F)(F)F)c1	1	1027
S(=O)(=O)(N[C@H](C(=O)N1[C@@H](C(=O)O)C[C@H](C)CC1)CCC/N=C(\N)/N)c1c2NC[C@@H](C)Cc2ccc1	1	1028
O=C1N=C2SC3=C(C2=C(c2ccccc2)NC1)CCCC3	1	1029
Clc1c(N=N[C@@H](C(=O)Nc2ccccc2)C(=O)C)ccc(-c2cc(Cl)c(N=N[C@@H](C(=O)Nc3ccccc3)C(=O)C)cc2)c1	1	1030
BrC=1C(=O)NC(=O)N([C@@H]2O[C@H](CO)[C@@H](O)C2)C=1	1	1031
O([C@@H](OC(=O)c1c2n(Cc3ccc(-c4c(-c5n[nH]nn5)cccc4)cc3)c(OCC)nc2ccc1)C)C(=O)OC1CCCCC1	1	1032
ClC(Cl)(SN1C(=O)[C@H]2[C@H](C1=O)CC=CC2)C(Cl)Cl	1	1033
O(CCNC[C@@H](O)COc1c2c([nH]c3c2cccc3)ccc1)c1c(OC)cccc1	1	1034
S(CC1=C(C(=O)O)N2C(=O)[C@@H](NC(=O)Cn3nnnc3)[C@@H]2SC1)c1sc(C)nn1	1	1035
O=C(OCOC(=O)C1=C(/C=C\c2c(C)ncs2)CS[C@@H]2[C@H](NC(=O)/C(=N\OC)/c3nc(N)sc3)C(=O)N12)C(C)(C)C	1	1036
S(CC1=C(C(=O)O)N2C(=O)[C@@H](NC(=O)/C(=N\OC)/c3nc(N)sc3)[C@H]2SC1)c1sc(CC(=O)O)c(C)n1	1	1037
O=C(N[C@H]1C(=O)N2C(C(=O)O)=C(COC(=O)C)CS[C@@H]12)/C(=N\OC)/c1nc(N)sc1	1	1038
ClC1=CC2=C(N(O)C/C(=N/C)/N=C2C=C1)c1ccccc1	1	1039
Clc1c2[C@](O)(C)[C@@H]3C(C(=O)[C@]4(O)C(=O)/C(=C(\O)/N)/C(=O)[C@@H](N(C)C)[C@@H]4C3)=C(O)c2c(O)cc1	1	1040
O=[N+]([O-])c1cc([C@@H]2C(C(=O)OC/C=C/c3ccccc3)=C(C)NC(C)=C2C(=O)OCCOC)ccc1	1	1041
Clc1cc2C(c3ccccc3)=N[C@H](C(=O)O)C(=O)Nc2cc1	1	1042
Clc1cc2NC(N3CCN(C)CC3)=C3C(=Nc2cc1)C=CC=C3	1	1043
O=C(N)C=1/C(=N/NN(C)C)/N=CN=1	1	1044
O=C(O)c1ccc(N2/C(=C\3/C(=O)C=CC=C/3)/N/C(=C\3/C(=O)C=CC=C/3)/N2)cc1	1	1045
O=C(OCC)[C@@H](N[C@H](C(=O)N(CC(=O)O)C1Cc2c(cccc2)C1)C)CCc1ccccc1	1	1046
Clc1c2[C@@H](O)[C@@H]3C(C(=O)[C@]4(O)C(=O)/C(=C(/O)\N)/C(=O)[C@@H](N(C)C)[C@@H]4C3)=C(O)c2c(O)cc1	1	1047
Br[C@@H](CBr)CCl	1	1048
O=C/1[C@@H](N(C)C)[C@@H]2[C@@H](O)[C@@H]3[C@@H](C)c4c(c(O)ccc4)C(O)=C3C(=O)[C@]2(O)C(=O)\C\1=C(/O)\N	1	1049
O=C(O)[C@@H](NC(=O)c1ccc([C@H](CC)Cc2nc3c(N)nc(N)nc3nc2)cc1)CCC(=O)O	1	1050
S=C1N(CC(=O)O)C(=O)/C(=C/C(=C/c2ccccc2)/C)/S1	1	1051
O=[N+](O[C@@H]([C@H](O[N+](=O)[O-])CO[N+](=O)[O-])CO[N+](=O)[O-])[O-]	1	1052
ClCC	1	1053
ClCCCl	1	1054
NCCN	1	1055
ClC(Cl)C	1	1056
O=C(OCC)/C=C(\C=C\C=C(\C=C\c1c(C)c(C)c(OC)cc1C)/C)/C	1	1057
Clc1c(OC)c(C(=O)O[C@@H]2[C@@H](C)O[C@@H](O[C@@H]3[C@@H](C)O[C@]4(O[C@]5(C)[C@H](O)[C@H](O[C@H]6[C@@H](OC)[C@@H](C)O[C@@H](O[C@H]7[C@H](O)[C@H](OC)[C@H](O[C@H]8[C@H](O)[C@@H]9O[C@]%10(O[C@H]9CO8)OC[C@@H](OC(=O)c8c(O)cc(O)cc8C)[C@@H]8OCO[C@@H]%108)O[C@@H]7COC)[C@@H]6O)O[C@H](C)[C@H]5O4)C[C@H]3O)C[C@H]2O[C@@H]2O[C@@H](C)[C@H](OC)[C@]([N+](=O)[O-])(C)C2)c(C)c(Cl)c1O	1	1058
Fc1cc2C(=O)C(C(=O)O)=CN3[C@H](C)CCc(c23)c1	1	1059
FCC(=O)O	1	1060
O=C(O)CN([C@@H](CN(CC(=O)O)CCN(CC(=O)O)CC(=O)O)Cc1ccc(OCC)cc1)CC(=O)O	1	1061
Fc1c(N2C[C@@H](C)NCC2)c(OC)c2N(C3CC3)C=C(C(=O)O)C(=O)c2c1	1	1062
O=C(O)[C@@H](N)CCC(=O)N	1	1063
Clc1c2c(c3c(c([C@@H](O)CCN(CCCC)CCCC)c2)ccc(C(F)(F)F)c3)cc(Cl)c1	1	1064
S(=O)(=O)(OC[C@@H]1[C@@H](O[C@H]2[C@@H](OS(=O)(=O)O)[C@@H](O)[C@H](O[C@H]3[C@@H](NS(=O)(=O)O)[C@H](OS(=O)(=O)O)[C@H](O[C@@H]4[C@H](OS(=O)(=O)O)[C@H](O)[C@H](O)[C@@H](C(=O)O)O4)[C@@H](CO)O3)[C@@H](C(=O)O)O2)[C@H](O)[C@H](NC(=O)C)[C@H](O)O1)O	1	1065
Cl[C@H]1C2[C@]3(Cl)C(Cl)(Cl)[C@@](Cl)(C(Cl)=C3Cl)[C@H]2C=C1	1	1066
O(C)c1cc2c([C@H](O)C3N4C[C@H](CC)[C@H](C3)CC4)ccnc2cc1	1	1067
IC=1C(=O)NC(=O)N([C@@H]2O[C@H](CO)[C@@H](O)C2)C=1	1	1068
Ic1cc(C/N=C(\N)/N)ccc1	1	1069
O=C(Oc1cc2c(CC)c3c(nc2cc1)C=1N(C(=O)C2=C([C@@](O)(CC)C(=O)OC2)C=1)C3)N1CCC(N2CCCCC2)CC1	1	1070
O(C)[C@@H]1[C@@H](O[C@@H]2O[C@@H](C)[C@H](O)[C@@H](OC)C2)[C@H](C)O[C@@H](O[C@@H]\2[C@@H](C)/C=C/C=C\3/[C@]4(O)[C@@H]([C@H](O)C(C)=C[C@H]4C(=O)O[C@@H]4C[C@@]5(O[C@H]([C@H](CC)C)[C@@H](C)CC5)O[C@@H](C4)C/C=C/2\C)OC/3)C1	1	1071
O=C(O)[C@H](C)c1cc(C(=O)c2ccccc2)ccc1	1	1072
O=C(N[C@H](C(=O)N[C@H](C(=O)N1[C@H](C(=O)NCC)CCC1)CCC/N=C(\N)/N)C(C)C)[C@H](NC(=O)[C@@H](NC(=O)[C@H](NC(=O)[C@@H](NC(=O)[C@@H](NC(=O)[C@H]1NC(=O)CC1)Cc1[nH]cnc1)Cc1c2c([nH]c1)cccc2)CO)Cc1ccc(O)cc1)C(C)C	1	1073
Clc1cc([C@@H](n2cncc2)c2cc3[nH]cnc3cc2)ccc1	1	1074
P(=O)(OCc1c(CN(CC(=O)O)CCN(CC(=O)O)Cc2c(O)c(C)ncc2COP(=O)(O)O)c(O)c(C)nc1)(O)O	1	1075
O=C(C)[C@]1(O)[C@]2(C)[C@H]([C@H]3[C@@H]([C@]4(C)C([C@@H](C)C3)=CC(=O)CC4)CC2)CC1	1	1076
O=S1(=O)N(C)/C(=C(/O)\Nc2sc(C)cn2)/C(=O)c2c1cccc2	1	1077
O=C(OCc1ccccc1)NC[C@H]1CN(C)[C@H]2[C@@H](c3c4c(n(C)cc4C2)ccc3)C1	1	1078
O=C(C(C[C@H](N(C)C)C)(c1ccccc1)c1ccccc1)CC	1	1079
C(N1c2c(Sc3c1cccc3)cccc2)[C@@H]1CN(C)CC1	1	1080
O=C(O[C@@H]1[C@]2(C)[C@H]([C@H]3[C@@H]([C@@]4(C)C(C)=CC(=O)C[C@@H]4CC3)CC2)CC1)C	1	1081
ClC	1	1082
S(C)C=1N(N)C(=O)C(C(C)(C)C)=NN=1	1	1083
O=C/1[C@@H](N(C)C)[C@H]2[C@@](O)(C(=O)\C\1=C(/O)\N)C(=O)C1=C(O)c3c(O)ccc(N(C)C)c3C[C@H]1C2	1	1084
ON1C(=N)N=C(N2CCCCC2)C=C1N	1	1085
N(\N=C(/C=N/N=C(\N)/N)\C)=C(\N)/N	1	1086
BrC[C@H](O)[C@@H](O)[C@@H](O)[C@H](O)CBr	1	1087
O=C(OC[C@H](O)CO)CCCCCCC	1	1088
O=CN(C)C	1	1089
O=[N+]([O-])c1cc([C@@H]2C(C(=O)OC)=C(C#N)NC(C)=C2C(=O)OC(C)C)ccc1	1	1090
CN1CCN(C=2Nc3c(N=C4SC(C)=CC=24)cccc3)CC1	1	1091
O=C(O)c1c(O)ccc(N/N=C/2\C=C(C(=O)O)C(=O)C=C\2)c1	1	1092
O=C1[C@@H](Cn2c(C)ncc2)CCc2n(C)c3c(c12)cccc3	1	1093
Clc1cc2C(c3ccccc3)=N[C@H](O)C(=O)Nc2cc1	1	1094
O=C/1[C@@H](N(C)C)[C@@H]2[C@@H](O)[C@@H]3[C@@](O)(C)c4c(c(O)ccc4)C(O)=C3C(=O)[C@]2(O)C(=O)\C\1=C(/O)\N	1	1095
Nc1ccc(Cc2ccc(N)cc2)cc1	1	1096
O=C1N(C)C(=O)O[C@]1(CC)C	1	1097
S(=O)(=O)(O)c1cc(C)c(C)cc1	1	1098
O=C(O[C@@H]1[C@H](O)[C@@H](O[C@H]2[C@@H](O)[C@H](O)[C@H](CO)O[C@H]2O[C@@H]([C@H](NC(=O)c2c(C)c(N)nc([C@H](NC[C@H](N)C(=O)N)CC(=O)N)n2)C(=O)N[C@@H]([C@H](O)[C@H](C(=O)N[C@@H]([C@H](O)C)C(=O)NCCc2scc(-c3scc(C(=O)NCCCN[C@@H](C)c4ccccc4)n3)n2)C)C)c2[nH]cnc2)O[C@H](CO)[C@H]1O)N	1	1099
O=S1(=O)N(C)/C(=C(/O)\Nc2ncccc2)/C(=O)c2c1cccc2	1	1100
O=C[C@H](CC)C1[C@H]2[C@@H](O)[C@]34[C@H](N(C)c5c3cccc5)[C@H](N(CCC)[C@@H]2C4)C1	1	1101
Clc1ccc(/C(/NCCCC(=O)N)=C/2\C(=O)C=CC(F)=C\2)cc1	1	1102
Cl[C@@H](CCl)C	1	1103
Clc1c(S(=O)(=O)N)cc2C(=O)N[C@@H](CC)Nc2c1	1	1104
Oc1cc(O)ccc1	1	1105
O=C(O[C@H]1[C@@H](C)[C@H](O)[C@@H](C)[C@@H](O)[C@@H](C)/C=C\C=C(/C)\C(=O)NC=2C(=O)c3c(O)c(C)c4O[C@@](C)(C(=O)c4c3C3=NC4(NC=23)CCN(CC(C)C)CC4)O/C=C\[C@H](OC)[C@H]1C)C	1	1106
O=C(O[C@H]1[C@H](C)[C@H](O)[C@H](C)[C@@H](O)[C@@H](C)/C=C/C=C(\C)/C(=O)NC=2/C(=C/NN3CCN(C4CCCC4)CC3)/C(=O)c3c(c(O)c(C)c4O[C@@](C)(C(=O)c34)O/C=C/[C@H](OC)[C@H]1C)C=2O)C	1	1107
O=C(O)CCCCC[C@H](c1ccccc1)C=1C(=O)C(C)=C(C)C(=O)C=1C	1	1108
O(C)[C@@H]1[C@H](O)/C(/C)=C/[C@@H](C)C(=O)CC([C@@H](C[C@H]2C[C@@H](OC)[C@H](O)CC2)C)OC(=O)[C@H]2N(C(=O)C(=O)[C@@]3(O)[C@H](C)CC[C@H](O3)C[C@H](OC)/C(/C)=C/C=C/C=C\[C@@H](C)C[C@@H](C)C1=O)CCCC2	1	1109
O=C(O)[C@H]1NC[C@@H](C2CCCCC2)C1	1	1110
S(=O)(=O)(Nc1ncccc1)c1ccc(N/N=C\2/C=C(C(=O)O)C(=O)C=C/2)cc1	1	1111
Fc1cc2/C(=C\c3c(C)c(C(=O)NCCN(CC)CC)c(C)[nH]3)/C(=O)Nc2cc1	1	1112
O(C)[C@H]1[C@H](O)CC[C@@H](/C=C(\C)/[C@@H]2[C@H](C)[C@@H](O)CC(=O)[C@H](CC=C)/C=C(/C)\C[C@H](C)C[C@H](OC)[C@@H]3[C@@H](OC)C[C@@H](C)[C@](O)(C(=O)C(=O)N4[C@H](C(=O)O2)CCCC4)O3)C1	1	1113
O=C(Nc1ccc(OC[C@@H](O)CNC(C)(C)C)cc1)NC1CCCCC1	1	1114
OCc1cc2/C(=C/NN/C(=N/CCCCC)/N)/C=Nc2cc1	1	1115
P(=O)(OCOC(=O)OC(C)C)(OCOC(=O)OC(C)C)CO[C@@H](Cn1c2ncnc(N)c2nc1)C	1	1116
ClC(Cl)C(Cl)Cl	1	1117
O=C/1[C@@H](N(C)C)[C@H]2[C@@](O)(C(=O)\C\1=C(/O)\N)C(=O)C1=C(O)c3c(O)cccc3[C@](O)(C)[C@H]1C2	1	1118
S=C1NC(=O)C([C@@H](CCC)C)(CC)C(=O)N1	1	1119
O=C(O)[C@H](C)c1sc(C(=O)c2ccccc2)cc1	1	1120
O=C(Nc1c(O)c2C(O)=C3C(=O)[C@]4(O)C(=O)/C(=C(\O)/N)/C(=O)[C@@H](N(C)C)[C@@H]4C[C@@H]3Cc2c(N(C)C)c1)CNC(C)(C)C	1	1121
S[C@@H](C(=O)NCC(=O)O)C	1	1122
O=C(CN1CCN(c2nc(N3CCCC3)nc(N3CCCC3)c2)CC1)[C@H]1[C@H](C)C[C@@H]2[C@]1(C)CC=C1[C@]3(C)C(=CC(=O)C=C3)CC[C@@H]21	1	1123
O=C(OC1C[C@@H]2N(C)[C@H](C1)CC2)c1c2c([nH]c1)cccc2	1	1124
O=C(OC)CCc1c(C)[cH0]=2[nH][cH0]1=CC=1C(CCC(=O)O)=C(C)C(N=1)=Cc1c(C=C)c(C)c([nH]1)C=C1N=C([C@]3(C)[C@H](C(=O)OC)C(C(=O)OC)=CC=C13)C=2	1	1125
O=C(C[C@@H](c1ccccc1)C1=C(O)Oc2c(C1=O)cccc2)C	1	1126
S(CC[C@@H]1C(=O)N[C@H](Cc2ccc(O)cc2)C(=O)N[C@H](CC(=O)O)C(=O)N[C@@H]2C(=O)N[C@@H]3C(=O)NC([C@H](O)C)C(=O)NCC(=O)N[C@@H](CO)C(=O)N[C@H](C(=O)N[C@@H](CCCNC(=N)N)C(=O)N[C@@H](CO)C(=O)NCC(=O)N[C@@H](CCCCN)C(=O)N[C@@H](C(=O)N)CSSC2)CSSC[C@H](C(=O)N[C@H](CO)C(=O)N[C@@H](CCCNC(=N)N)C(=O)N[C@H](CC(C)C)C(=O)N1)NC(=O)[C@H](CCCCN)NC(=O)[C@@H](C)NC(=O)CNC(=O)[C@H](CCCCN)NC(=O)CNC(=O)[C@H](CCCCN)NC(=O)[C@H](N…	1	1127
O=C1N([C@@H]2O[C@H](CO)[C@@H]([N-][N+]#N)C2)C=C(C)C(=O)N1	1	1128
Clc1c(N)nc(N)c(C(=O)/N=C(\N)/N)n1	1	1129
S(=O)(=O)(N(C)c1nc(C(C)C)c(CC[C@@H](O)C[C@@H](O)CC(=O)O)c(-c2ccc(F)cc2)n1)C	1	1130
Clc1ccc(C(N2CCN(C)CC2)c2ccccc2)cc1	1	1131
P(=O)(O)(O)COCCn1c2ncnc(N)c2nc1	1	1132
O(C)[C@H]1[C@H](O)CC[C@@H](/C=C(\C)/[C@@H]2[C@H](C)[C@@H](O)CC(=O)[C@@H](CC=C)/C=C(/C)\C[C@H](C)C[C@H](OC)[C@@H]3[C@@H](OC)C[C@@H](C)[C@](O)(C(=O)C(=O)N4[C@H](C(=O)O2)CCCC4)O3)C1	1	1133
O=C(NC(C(=O)NC(C(=O)NC(C(=O)NC(C(=O)CN1C(C(=O)NCC(=O)N)CCC1)CCCNC(=N)N)CC(C)C)CC=1c2c(cccc2)CC=1)Cc1ccc(O)cc1)C(NC(=O)C(NC(=O)C(CC(=O)C1NC(=O)CC1)Cc1[nH]cnc1)CCc1c(NC=C)cccc1)CO	1	1134
ClC1=CC2=C(N(O)C/C(=N\C)/N=C2C=C1)c1ccccc1	1	1135
FC(F)(F)c1nc2c(C(F)(F)F)cccc2c(C(O)C2NCCCC2)c1	1	1136
Fc1ccc(CN/C(/O)=C/2\C(=O)C(=O)N(C)C(C(NC(=O)c3oc(C)nn3)(C)C)=N\2)cc1	1	1137
n1c2c(ncc1)cc1[C@H]3CNC[C@@H](c1c2)C3	1	1138
O=C(OC)[C@@H](N)Cc1cc(O)c(O)cc1	1	1139
Clc1c(OC)cc(OC)c2C(=O)[C@@]3([C@H](C)CC(=O)CC3OC)Oc12	1	1140
S=C1N(CCC)C(=O)C=CN1	1	1141
